# Supplementary material for: Analysis of historical road accident data supporting autonomous vehicle control strategies
Source: PeerJ journal article supplement (doi:10.7717/peerj-cs.399), 2021-02-23
Supplement: accident_scoring.pdf [file accident_scoring.pdf]

Table 1: “Slippery Road Surface” ( $R_1$ ) scores for the “Accident Nature” property

| Code | Description                                   | Weight                  |
|------|-----------------------------------------------|-------------------------|
| 31   | Slipping, carving, overturning on the road    | $W_{accnat=31}^1 = 0.9$ |
| 32   | Track leaving, with solid object collision    | $W_{accnat=32}^1 = 0.4$ |
| 33   | Track leaving, without solid object collision | $W_{accnat=33}^1 = 0.4$ |
| ?    | Other cases                                   | $W_{accnat=?}^1 = 0.0$  |

Table 2: “Slippery Road Surface” ( $R_1$ ) scores for the “Road Surface” property

| Code | Description                | Weight                  |
|------|----------------------------|-------------------------|
| 1    | normal                     | $W_{roadsrf=1}^1 = 0.0$ |
| 2    | wet                        | $W_{roadsrf=2}^1 = 0.3$ |
| 3    | snowy                      | $W_{roadsrf=3}^1 = 0.6$ |
| 4    | oily, slippery             | $W_{roadsrf=4}^1 = 1.0$ |
| 5    | other staining (mud, etc.) | $W_{roadsrf=5}^1 = 0.7$ |
| 6    | not a road                 | $W_{roadsrf=6}^1 = 0.0$ |

Table 3: “Slippery Road Surface” ( $R_1$ ) scores for the “Weather” property

| Code | Description | Weight               |
|------|-------------|----------------------|
| 1    | sunny       | $W_{wthr=1}^1 = 0.0$ |
| 2    | overcast    | $W_{wthr=2}^1 = 0.0$ |
| 3    | foggy       | $W_{wthr=3}^1 = 0.1$ |
| 4    | rainy       | $W_{wthr=4}^1 = 0.2$ |
| 5    | stormy      | $W_{wthr=5}^1 = 0.3$ |
| 6    | snowy       | $W_{wthr=6}^1 = 0.5$ |
