# Supplementary material for: Analysis of historical road accident data supporting autonomous vehicle control strategies
Source: PeerJ Comput Sci. 2021 Feb 23;7:e399. doi: 10.7717/peerj-cs.399 (PMC7959616; doi:10.7717/peerj-cs.399)
Supplement: Supplemental Information 1 — Each row of the file stands for an accident. [file peerj-cs-07-399-s001.xlsx]

## Sheet: Web-Bal export
#	Accident time	County	GPS	Road number and section	Outcome	Surface	Weather	Accident nature
1	2011-01-01 03:34:00	Győr-Moson-Sopron	47.726694 17.724638	1 117+527	light injury	normal	sunny	collision in same direction
2	2011-01-01 20:00:00	Győr-Moson-Sopron	47.513793 17.252693	86 138+235	light injury	normal	overcast	track leaving, with solid object collision
3	2011-01-02 09:12:00	Győr-Moson-Sopron	47.727449 16.643588	94000	light injury	snowy	snowy	track leaving, with solid object collision
4	2011-01-03 14:00:00	Heves	47.68811 19.741471	M3 60+700	light injury	wet	overcast	track leaving, without solid object collision
5	2011-01-03 14:00:00	Győr-Moson-Sopron	47.660278 17.658138	94000	light injury	normal	sunny	pedestrian
6	2011-01-03 16:35:00	Heves	47.885643 20.349	2416 41+179	serious injury	wet	overcast	pedestrian
7	2011-01-04 05:10:00	Győr-Moson-Sopron	45.037146 10.787483	M1 0+000	serious injury	wet	foggy	collision in same direction
8	2011-01-04 06:30:00	Győr-Moson-Sopron	47.811478 17.302068	M1 153+137	light injury	wet	sunny	collision in same direction
9	2011-01-04 09:00:00	Győr-Moson-Sopron	47.612049 17.245256	94000	light injury	snowy	sunny	collision in crossing direction
10	2011-01-04 16:50:00	Győr-Moson-Sopron	47.544899 16.822533	8627 0+000	serious injury	wet	overcast	pedestrian
11	2011-01-04 17:45:00	Győr-Moson-Sopron	47.621164 16.676468	84 111+143	light injury	normal	overcast	collision in same direction
12	2011-01-05 10:20:00	Győr-Moson-Sopron	47.568989 17.88186	81 56+937	light injury	normal	overcast	track leaving, without solid object collision
13	2011-01-05 16:03:00	Győr-Moson-Sopron	47.689916 17.632777	94000	light injury	normal	sunny	pedestrian
14	2011-01-06 00:43:00	Győr-Moson-Sopron	47.595611 17.587027	83 63+382	light injury	normal	sunny	track leaving, with solid object collision
15	2011-01-06 03:15:00	Győr-Moson-Sopron	47.677777 17.58736	1 129+881	light injury	normal	sunny	track leaving, without solid object collision
16	2011-01-06 07:05:00	Győr-Moson-Sopron	47.82936 17.314027	1 156+622	serious injury	normal	sunny	collision in same direction
17	2011-01-06 07:30:00	Győr-Moson-Sopron	47.689647 17.635004	94000	light injury	wet	sunny	pedestrian
18	2011-01-07 09:40:00	Győr-Moson-Sopron	47.685759 17.635416	94000	light injury	wet	sunny	collision with stopped vehicle
19	2011-01-08 10:45:00	Heves	47.680166 19.66675	21 1+812	light injury	wet	overcast	collision in same direction
20	2011-01-09 04:30:00	Győr-Moson-Sopron	47.699874 17.289348	8509 8+593	serious injury	snowy	foggy	track leaving, without solid object collision
21	2011-01-09 09:00:00	Győr-Moson-Sopron	47.571111 17.579221	83 60+558	serious injury	snowy	sunny	track leaving, without solid object collision
22	2011-01-09 14:00:00	Győr-Moson-Sopron	47.690555 17.523555	M1 131+544	light injury	wet	foggy	track leaving, without solid object collision
23	2011-01-10 11:30:00	Heves	47.902437 20.365361	94000	light injury	normal	overcast	pedestrian
24	2011-01-11 12:00:00	Győr-Moson-Sopron	47.557346 16.842145	8612 30+499	light injury	wet	foggy	collision in crossing direction
25	2011-01-12 05:25:00	Győr-Moson-Sopron	47.512563 17.249099	86 137+919	serious injury	wet	overcast	track leaving, without solid object collision
26	2011-01-12 10:02:00	Győr-Moson-Sopron	47.498742 17.687112	94000	light injury	wet	sunny	collision with animals
27	2011-01-12 18:30:00	Győr-Moson-Sopron	47.682405 16.573767	86107 3+665	light injury	wet	overcast	pedestrian
28	2011-01-13 05:28:00	Heves	47.928059 20.193674	24 42+283	fatal	snowy	overcast	track leaving, with solid object collision
29	2011-01-13 16:35:00	Győr-Moson-Sopron	47.687305 17.62336	94000	light injury	wet	rainy	collision in crossing direction
30	2011-01-13 16:44:00	Győr-Moson-Sopron	47.672139 17.643055	94000	light injury	wet	rainy	collision in crossing direction
31	2011-01-13 17:00:00	Győr-Moson-Sopron	47.574283 17.580245	83 60+919	light injury	wet	rainy	collosing opposite direction
32	2011-01-14 10:00:00	Győr-Moson-Sopron	47.595556 17.586999	83 63+376	serious injury	wet	overcast	collosing opposite direction
33	2011-01-14 12:00:00	Győr-Moson-Sopron	47.6675 17.650833	94000	light injury	not a road	sunny	collision in crossing direction
34	2011-01-14 16:55:00	Heves	47.700833 20.475083	33101 11+882	fatal	wet	foggy	track leaving, without solid object collision
35	2011-01-14 17:35:00	Győr-Moson-Sopron	47.597477 16.809977	85 60+698	light injury	wet	foggy	collision in same direction
36	2011-01-14 18:30:00	Győr-Moson-Sopron	47.878736 17.273543	150 1+000	serious injury	wet	overcast	pedestrian
37	2011-01-15 03:00:00	Heves	47.869165 20.381694	25 10+629	light injury	wet	overcast	track leaving, with solid object collision
38	2011-01-15 20:48:00	Győr-Moson-Sopron	47.596463 16.927697	85 51+165	serious injury	normal	overcast	track leaving, without solid object collision
39	2011-01-16 01:10:00	Heves	47.870637 20.380472	94000 1+600	light injury	wet	overcast	track leaving, without solid object collision
40	2011-01-16 07:25:00	Heves	48.013276 20.036944	23 18+306	light injury	wet	sunny	track leaving, with solid object collision
41	2011-01-16 10:48:00	Győr-Moson-Sopron	47.766134 17.385111	M1 144+956	light injury	normal	sunny	track leaving, with solid object collision
42	2011-01-16 17:50:00	Győr-Moson-Sopron	47.460889 17.302916	8408 17+262	serious injury	normal	sunny	pedestrian
43	2011-01-17 07:45:00	Heves	47.763996 19.909523	3 79+462	serious injury	wet	foggy	collision in crossing direction
44	2011-01-17 17:50:00	Győr-Moson-Sopron	47.684655 16.577125	94000	light injury	wet	overcast	pedestrian
45	2011-01-18 18:45:00	Győr-Moson-Sopron	47.61566 16.838139	8522 0+500	light injury	wet	foggy	track leaving, without solid object collision
46	2011-01-18 18:55:00	Heves	47.667945 19.681849	3 58+328	serious injury	normal	sunny	pedestrian
47	2011-01-19 17:00:00	Győr-Moson-Sopron	47.642694 17.609749	83 69+420	light injury	wet	rainy	collision in same direction
48	2011-01-19 17:30:00	Győr-Moson-Sopron	47.766611 17.682638	1303 3+888	light injury	wet	rainy	track leaving, without solid object collision
49	2011-01-20 08:50:00	Győr-Moson-Sopron	47.686889 17.627027	94000	light injury	normal	overcast	collision with turning
50	2011-01-20 13:26:00	Győr-Moson-Sopron	47.686371 17.621281	94000	light injury	normal	sunny	collision with turning
51	2011-01-20 13:40:00	Heves	47.754116 19.953644	3204-01-31 18:55:00	serious injury	wet	overcast	collision in same direction
52	2011-01-20 19:35:00	Győr-Moson-Sopron	47.88728 17.319012	94000	light injury	normal	sunny	track leaving, with solid object collision
53	2011-01-21 07:40:00	Győr-Moson-Sopron	47.777999 17.064833	8507 4+663	serious injury	snowy	sunny	track leaving, without solid object collision
54	2011-01-21 07:50:00	Győr-Moson-Sopron	47.452773 16.689265	8627 22+725	serious injury	snowy	overcast	track leaving, without solid object collision
55	2011-01-21 16:35:00	Győr-Moson-Sopron	47.905388 17.181306	1 171+049	fatal	normal	overcast	collision in crossing direction
56	2011-01-23 05:40:00	Győr-Moson-Sopron	47.689555 17.643333	14 0+121	light injury	normal	sunny	collision with solid obstacle
57	2011-01-24 06:40:00	Győr-Moson-Sopron	47.577427 17.24243	86 146+164	light injury	snowy	overcast	track leaving, without solid object collision
58	2011-01-24 15:05:00	Győr-Moson-Sopron	47.440629 16.673436	94000	fatal	wet	sunny	collision in crossing direction
59	2011-01-25 17:36:00	Győr-Moson-Sopron	47.861388 17.395055	1401 25+144	light injury	wet	overcast	track leaving, with solid object collision
60	2011-01-26 05:30:00	Heves	47.82842 20.114365	2410 0+600	serious injury	snowy	overcast	track leaving, without solid object collision
61	2011-01-26 05:48:00	Győr-Moson-Sopron	47.562333 17.574194	83 59+345	light injury	snowy	sunny	track leaving, with solid object collision
62	2011-01-27 07:45:00	Heves	47.879661 20.381841	25 11+817	serious injury	snowy	sunny	pedestrian
63	2011-01-27 16:00:00	Heves	48.004331 20.323861	2506 1+491	serious injury	snowy	sunny	track leaving, without solid object collision
64	2011-01-28 10:30:00	Győr-Moson-Sopron	47.620267 16.866549	8518 5+270	light injury	normal	overcast	collision in crossing direction
65	2011-01-28 13:55:00	Heves	47.737499 19.978194	3204-04-30 23:22:00	serious injury	wet	sunny	track leaving, with solid object collision
66	2011-01-28 14:00:00	Győr-Moson-Sopron	47.691055 17.523583	M1 131+560	light injury	wet	foggy	track leaving, without solid object collision
67	2011-01-28 18:15:00	Győr-Moson-Sopron	47.691472 17.653166	1 124+512	light injury	snowy	foggy	collision in crossing direction
68	2011-01-30 04:00:00	Győr-Moson-Sopron	47.672347 16.633021	8518 24+807	light injury	wet	sunny	track leaving, with solid object collision
69	2011-01-30 15:00:00	Heves	48.002255 20.319555	25 27+400	light injury	snowy	sunny	collosing opposite direction
70	2011-01-31 07:13:00	Győr-Moson-Sopron	47.668608 17.644617	94000	light injury	normal	overcast	collision in crossing direction
71	2011-01-31 13:20:00	Győr-Moson-Sopron	47.676639 17.665249	94000	serious injury	normal	overcast	collision in same direction
72	2011-01-31 17:10:00	Győr-Moson-Sopron	47.502239 16.784135	8627 13+242	light injury	normal	sunny	collision in crossing direction
73	2011-02-01 13:45:00	Győr-Moson-Sopron	47.689639 17.634916	94000	light injury	normal	sunny	collision in crossing direction
74	2011-02-02 10:55:00	Győr-Moson-Sopron	47.627615 17.321859	85 20+463	light injury	normal	sunny	track leaving, without solid object collision
75	2011-02-02 13:20:00	Győr-Moson-Sopron	47.464533 17.112677	86 125+487	light injury	normal	sunny	collision in crossing direction
76	2011-02-02 16:45:00	Győr-Moson-Sopron	47.661028 17.638249	94000	light injury	normal	sunny	collision in same direction
77	2011-02-03 09:05:00	Győr-Moson-Sopron	47.678248 16.618204		serious injury	normal	sunny	collision in crossing direction
78	2011-02-03 16:05:00	Győr-Moson-Sopron	47.630269 16.732729	8518 15+712	light injury	wet	sunny	track leaving, without solid object collision
79	2011-02-03 16:30:00	Győr-Moson-Sopron	47.639722 17.654721	M1 119+400	serious injury	normal	sunny	track leaving, with solid object collision
80	2011-02-03 17:40:00	Győr-Moson-Sopron	47.60717 17.244675	86 149+490	light injury	normal	sunny	collision in same direction
81	2011-02-04 18:30:00	Győr-Moson-Sopron	47.682342 16.573582	94000	light injury	wet	sunny	pedestrian
82	2011-02-04 19:45:00	Győr-Moson-Sopron	47.436574 17.068252	86 120+754	serious injury	normal	overcast	collosing opposite direction
83	2011-02-05 04:51:00	Győr-Moson-Sopron	47.758083 17.550638	1401 8+584	light injury	wet	sunny	track leaving, with solid object collision
84	2011-02-05 05:15:00	Győr-Moson-Sopron	47.601778 17.746471	8222-10-01 02:00:00	light injury	normal	sunny	track leaving, without solid object collision
85	2011-02-05 13:57:00	Győr-Moson-Sopron	47.677027 17.613694	1 127+889	light injury	normal	sunny	collision in same direction
86	2011-02-06 07:30:00	Győr-Moson-Sopron	47.463916 16.689	94000 0+000	light injury	snowy	sunny	track leaving, with solid object collision
87	2011-02-06 20:15:00	Győr-Moson-Sopron	47.631557 17.636575	83129 0+643	light injury	normal	sunny	track leaving, without solid object collision
88	2011-02-07 05:35:00	Győr-Moson-Sopron	47.597222 17.610638	8309 21+638	light injury	normal	sunny	track leaving, without solid object collision
89	2011-02-07 06:50:00	Győr-Moson-Sopron	47.709749 16.608941	8527-01-31 19:00:00	light injury	wet	sunny	collision with turning
90	2011-02-07 08:05:00	Győr-Moson-Sopron	47.520831 17.265182	86 139+511	serious injury	wet	sunny	collosing opposite direction
91	2011-02-08 08:18:00	Heves	47.92083 20.372702	94000	light injury	normal	overcast	pedestrian
92	2011-02-08 10:15:00	Győr-Moson-Sopron	47.729751 16.634223	8527-04-30 18:00:00	light injury	wet	sunny	track leaving, without solid object collision
93	2011-02-08 17:40:00	Győr-Moson-Sopron	47.856944 17.290518	94000	light injury	normal	sunny	track leaving, with solid object collision
94	2011-02-09 08:15:00	Heves	47.805168 19.909603	24137 1+700	light injury	wet	sunny	track leaving, without solid object collision
95	2011-02-09 08:17:00	Győr-Moson-Sopron	47.547889 17.748749	94000	serious injury	normal	sunny	collision with turning
96	2011-02-09 10:50:00	Heves	47.667945 19.681849	3 58+328	fatal	normal	sunny	collision in same direction
97	2011-02-10 14:15:00	Győr-Moson-Sopron	47.851705 17.277929	94000	light injury	normal	sunny	collision in crossing direction
98	2011-02-10 14:50:00	Győr-Moson-Sopron	47.684889 16.59311	94000	light injury	normal	sunny	collision in same direction
99	2011-02-10 14:50:00	Győr-Moson-Sopron	47.659583 17.657305	94000	light injury	normal	sunny	collision with turning
100	2011-02-10 15:30:00	Heves	47.794543 20.000769	2416-03-31 22:04:00	serious injury	not a road	sunny	pedestrian
101	2011-02-10 19:43:00	Heves	47.89296 20.371561	25 13+726	light injury	wet	overcast	collision with turning
102	2011-02-10 20:30:00	Heves	47.731255 19.664455	21 7+380	serious injury	wet	sunny	collision in crossing direction
103	2011-02-11 08:15:00	Győr-Moson-Sopron	47.594233 16.862898	94000	serious injury	wet	rainy	collision in crossing direction
104	2011-02-11 10:40:00	Győr-Moson-Sopron	47.58488 17.243034	86 146+992	serious injury	wet	overcast	collision with turning
105	2011-02-11 21:30:00	Győr-Moson-Sopron	47.60029 16.753647	85 65+021	light injury	wet	overcast	track leaving, without solid object collision
106	2011-02-12 05:55:00	Győr-Moson-Sopron	47.671305 17.639027	94000	light injury	wet	overcast	collision in crossing direction
107	2011-02-12 08:40:00	Heves	47.896336 20.386587	94000	light injury	normal	sunny	pedestrian
108	2011-02-13 09:35:00	Győr-Moson-Sopron	47.502239 16.784135	8627 13+242	light injury	normal	overcast	collision in crossing direction
109	2011-02-13 17:10:00	Heves	47.919075 20.36949	25 16+982	light injury	normal	sunny	collision in crossing direction
110	2011-02-13 17:56:00	Győr-Moson-Sopron	47.667583 17.656416	94000	serious injury	normal	overcast	collision in crossing direction
111	2011-02-15 11:52:00	Heves	47.899041 20.373094	94000	light injury	normal	sunny	not driver accident
112	2011-02-15 15:00:00	Heves	47.73649 19.982022	3204-04-30 20:07:00	light injury	normal	sunny	track leaving, without solid object collision
113	2011-02-16 02:20:00	Győr-Moson-Sopron	47.481626 16.796779	84 92+613	serious injury	snowy	rainy	pedestrian
114	2011-02-16 04:10:00	Győr-Moson-Sopron	47.778694 17.067	8507-05-31 20:00:00	serious injury	snowy	foggy	track leaving, with solid object collision
115	2011-02-16 05:30:00	Győr-Moson-Sopron	47.865303 17.259227	94000	serious injury	snowy	rainy	collision in crossing direction
116	2011-02-16 08:10:00	Győr-Moson-Sopron	47.595763 16.782454	8612 30+499	serious injury	wet	rainy	collision in crossing direction
117	2011-02-17 05:25:00	Győr-Moson-Sopron	47.642138 17.408277	85 13+521	light injury	wet	overcast	collision in same direction
118	2011-02-17 11:54:00	Heves	47.667722 19.682472	3 58+381	fatal	wet	snowy	pedestrian
119	2011-02-17 18:20:00	Győr-Moson-Sopron	47.561124 17.704328	94000	light injury	wet	overcast	pedestrian
120	2011-02-18 06:53:00	Győr-Moson-Sopron	47.685778 17.688249	94000	light injury	wet	rainy	collision in same direction
121	2011-02-18 07:00:00	Heves	47.726325 19.982282	M3 79+801	light injury	wet	overcast	collision with turning
122	2011-02-18 08:25:00	Heves	47.626111 19.731222	32 5+330	serious injury	wet	overcast	track leaving, without solid object collision
123	2011-02-18 09:40:00	Győr-Moson-Sopron	47.542334 17.643805	94000	light injury	wet	foggy	track leaving, without solid object collision
124	2011-02-18 16:20:00	Győr-Moson-Sopron	47.739683 16.546444	84 0+000	light injury	other	overcast	collision in same direction
125	2011-02-18 16:35:00	Győr-Moson-Sopron	47.689763 16.57719	94000	light injury	normal	overcast	collision with turning
126	2011-02-18 17:50:00	Győr-Moson-Sopron	47.721379 17.612724	M1 129+798	serious injury	normal	overcast	collision in same direction
127	2011-02-19 11:30:00	Heves	47.596361 20.287667	94000	light injury	normal	sunny	collision in crossing direction
128	2011-02-19 20:55:00	Heves	47.779275 19.928716	24 0+469	serious injury	wet	rainy	pedestrian
129	2011-02-19 23:35:00	Győr-Moson-Sopron	47.834653 17.460589	94000	light injury	normal	sunny	track leaving, without solid object collision
130	2011-02-20 05:33:00	Győr-Moson-Sopron	47.831075 17.316418	1 156+765	fatal	normal	sunny	collosing opposite direction
131	2011-02-20 19:50:00	Győr-Moson-Sopron	47.668694 17.653749	94000	light injury	normal	sunny	collision with turning
132	2011-02-22 18:25:00	Heves	47.729126 19.919214	M3 74+900	light injury	normal	sunny	collision in same direction
133	2011-02-23 14:30:00	Győr-Moson-Sopron	47.680584 16.586389	94000	light injury	normal	sunny	pedestrian
134	2011-02-23 18:40:00	Heves	47.705722 20.084944	M3 88+324	light injury	normal	overcast	collision in same direction
135	2011-02-23 18:55:00	Győr-Moson-Sopron	47.607611 17.613499	83129 0+000	light injury	normal	overcast	track leaving, without solid object collision
136	2011-02-24 07:40:00	Heves	48.050566 20.34635	2506-06-30 19:05:00	light injury	normal	overcast	pedestrian
137	2011-02-25 06:50:00	Heves	47.729999 20.388778	M3 111+497	serious injury	snowy	snowy	collision with turning
138	2011-02-25 08:30:00	Heves	47.97247 20.346805	25 23+441	fatal	snowy	snowy	pedestrian
139	2011-02-26 11:08:00	Győr-Moson-Sopron	47.6915 17.653138	94000	light injury	normal	sunny	collision in crossing direction
140	2011-02-26 13:47:00	Győr-Moson-Sopron	47.634101 16.654325	84 113+342	light injury	normal	sunny	track leaving, without solid object collision
141	2011-02-27 20:50:00	Győr-Moson-Sopron	47.686778 17.812749	M1 106+063	light injury	normal	sunny	track leaving, without solid object collision
142	2011-03-01 10:05:00	Heves	47.918344 19.882715	24113 0+693	light injury	snowy	sunny	collosing opposite direction
143	2011-03-02 11:15:00	Győr-Moson-Sopron	47.608811 16.706299	85 69+000	light injury	normal	sunny	track leaving, without solid object collision
144	2011-03-02 13:02:00	Heves	47.951011 20.084754	94000	serious injury	normal	sunny	slipping, carving, overturning on the road
145	2011-03-02 20:21:00	Győr-Moson-Sopron	47.67859 17.660915	81 81+542	serious injury	wet	snowy	pedestrian
146	2011-03-03 06:50:00	Heves	47.807464 19.868043	24138 2+566	light injury	snowy	overcast	track leaving, with solid object collision
147	2011-03-03 07:45:00	Győr-Moson-Sopron	47.684798 16.599925	94000	light injury	snowy	overcast	collision in same direction
148	2011-03-03 12:00:00	Győr-Moson-Sopron	47.689498 16.541561	86108 1+963	serious injury	wet	overcast	track leaving, with solid object collision
149	2011-03-03 14:25:00	Győr-Moson-Sopron	47.984722 17.251695	1408 12+205	serious injury	normal	overcast	track leaving, with solid object collision
150	2011-03-03 22:05:00	Győr-Moson-Sopron	47.730333 17.488805	94000	serious injury	wet	overcast	track leaving, with solid object collision
151	2011-03-04 14:55:00	Győr-Moson-Sopron	47.661055 17.63611	94000	serious injury	normal	sunny	collision with turning
152	2011-03-04 18:40:00	Győr-Moson-Sopron	47.622793 17.604848	94000	light injury	normal	sunny	collision with turning
153	2011-03-05 02:10:00	Győr-Moson-Sopron	47.672606 17.644337	94000	light injury	normal	overcast	track leaving, with solid object collision
154	2011-03-05 05:00:00	Győr-Moson-Sopron	47.65 17.583333	M1 125+198	light injury	normal	sunny	track leaving, with solid object collision
155	2011-03-05 08:15:00	Heves	48.01822 20.092416	23 22+586	serious injury	wet	overcast	track leaving, without solid object collision
156	2011-03-07 13:40:00	Heves	47.658047 20.259168	94000	light injury	normal	sunny	track leaving, without solid object collision
157	2011-03-07 15:25:00	Heves	47.837849 20.416075	2501 7+063	light injury	normal	sunny	collision in crossing direction
158	2011-03-08 10:00:00	Győr-Moson-Sopron	49.277023 18.749165	M1 0+000	light injury	normal	sunny	track leaving, without solid object collision
159	2011-03-09 03:00:00	Győr-Moson-Sopron	47.606207 16.726964	85 67+208	light injury	normal	sunny	track leaving, without solid object collision
160	2011-03-09 09:45:00	Heves	47.770055 19.934944	94000	serious injury	normal	sunny	collision in crossing direction
161	2011-03-09 11:08:00	Győr-Moson-Sopron	47.732139 17.846999	1 108+000	light injury	normal	sunny	collision in same direction
162	2011-03-09 12:50:00	Győr-Moson-Sopron	47.681545 16.594491	94000	light injury	normal	sunny	pedestrian
163	2011-03-09 14:22:00	Győr-Moson-Sopron	47.687277 17.623333	94000	light injury	normal	sunny	collision in crossing direction
164	2011-03-09 15:35:00	Heves	47.680555 19.666416	21 1+847	light injury	normal	sunny	track leaving, with solid object collision
165	2011-03-09 16:05:00	Győr-Moson-Sopron	47.684994 16.587742	94000	serious injury	normal	sunny	collision in crossing direction
166	2011-03-09 18:37:00	Győr-Moson-Sopron	47.858146 17.262396	94000	serious injury	normal	sunny	collision with stopped vehicle
167	2011-03-10 16:45:00	Győr-Moson-Sopron	47.607445 16.720183	85 67+650	fatal	wet	overcast	collosing opposite direction
168	2011-03-10 17:10:00	Heves	47.784316 19.92754	94000	light injury	normal	sunny	pedestrian
169	2011-03-10 18:20:00	Győr-Moson-Sopron	47.693889 17.639888	14 0+487	light injury	wet	overcast	collosing opposite direction
170	2011-03-11 04:35:00	Győr-Moson-Sopron	51.321915 18.62862	M1 155+329	light injury	wet	overcast	track leaving, without solid object collision
171	2011-03-11 16:50:00	Győr-Moson-Sopron	47.589043 17.074808	85 39+730	light injury	normal	sunny	collision in same direction
172	2011-03-12 07:10:00	Győr-Moson-Sopron	47.682648 16.565417	94000	light injury	not a road	sunny	collision in crossing direction
173	2011-03-12 16:25:00	Győr-Moson-Sopron	47.682577 16.586434	8525-12-31 15:29:00	light injury	normal	sunny	collision in crossing direction
174	2011-03-13 16:16:00	Győr-Moson-Sopron	47.687266 17.623348	94000	serious injury	normal	sunny	collision in crossing direction
175	2011-03-14 04:05:00	Győr-Moson-Sopron	47.681097 16.597037	94000	light injury	normal	sunny	track leaving, with solid object collision
176	2011-03-14 10:10:00	Győr-Moson-Sopron	47.502239 16.784135	8627 13+000	light injury	normal	overcast	collision in crossing direction
177	2011-03-14 19:55:00	Heves	47.852721 20.365777	25 8+187	fatal	wet	overcast	track leaving, with solid object collision
178	2011-03-15 16:00:00	Győr-Moson-Sopron	47.455392 17.311635	94000	light injury	normal	sunny	track leaving, with solid object collision
179	2011-03-15 17:25:00	Győr-Moson-Sopron	47.614807 16.688834	84603 0+100	serious injury	normal	sunny	collision in crossing direction
180	2011-03-16 06:55:00	Heves	47.922887 20.429666	2504-04-30 22:40:00	light injury	wet	overcast	track leaving, without solid object collision
181	2011-03-16 19:50:00	Győr-Moson-Sopron	47.540528 17.733888	82 56+724	light injury	normal	sunny	track leaving, with solid object collision
182	2011-03-16 20:00:00	Győr-Moson-Sopron	47.669789 17.647614	94000	serious injury	not a road	sunny	slipping, carving, overturning on the road
183	2011-03-16 21:28:00	Heves	47.925276 20.082389	24 32+367	serious injury	normal	overcast	track leaving, without solid object collision
184	2011-03-17 06:50:00	Győr-Moson-Sopron	47.435192 17.772492	8302 27+231	light injury	wet	rainy	track leaving, with solid object collision
185	2011-03-17 07:30:00	Győr-Moson-Sopron	47.856888 17.27247	94000	light injury	wet	overcast	pedestrian
186	2011-03-17 19:10:00	Heves	47.900038 20.370819	94000	light injury	wet	rainy	pedestrian
187	2011-03-17 22:20:00	Győr-Moson-Sopron	47.68075 17.661083	94000	serious injury	wet	rainy	pedestrian
188	2011-03-18 04:50:00	Győr-Moson-Sopron	47.735556 18.2475	M1 0+000	light injury	wet	rainy	collision in same direction
189	2011-03-18 10:35:00	Győr-Moson-Sopron	47.868261 17.27139	1 162+833	light injury	wet	rainy	pedestrian
190	2011-03-18 12:55:00	Győr-Moson-Sopron	47.596315 16.79981	85 60+476	light injury	wet	rainy	track leaving, without solid object collision
191	2011-03-18 15:00:00	Győr-Moson-Sopron	47.969266 17.283989	1408 10+201	serious injury	wet	rainy	slipping, carving, overturning on the road
192	2011-03-18 16:32:00	Heves	47.773169 19.931515	94000	light injury	wet	overcast	collision in crossing direction
193	2011-03-18 17:00:00	Győr-Moson-Sopron	47.691972 17.644138	94000	light injury	wet	rainy	pedestrian
194	2011-03-18 18:45:00	Győr-Moson-Sopron	47.687696 16.584333	94000	light injury	wet	overcast	pedestrian
195	2011-03-18 18:50:00	Heves	47.895637 20.387333	94000	light injury	wet	overcast	pedestrian
196	2011-03-18 18:51:00	Győr-Moson-Sopron	47.875268 17.263782	94000	light injury	wet	overcast	pedestrian
197	2011-03-18 19:10:00	Győr-Moson-Sopron	47.690465 16.583112	94000	serious injury	wet	overcast	pedestrian
198	2011-03-19 17:25:00	Győr-Moson-Sopron	47.597868 17.163509	85 32+925	serious injury	wet	overcast	collision in crossing direction
199	2011-03-21 11:20:00	Heves	47.822605 20.357067	25 4+104	light injury	normal	sunny	track leaving, without solid object collision
200	2011-03-21 11:35:00	Győr-Moson-Sopron	47.684722 17.626944	94000	serious injury	normal	sunny	collision with turning
201	2011-03-21 15:42:00	Győr-Moson-Sopron	47.553611 17.578277		serious injury	normal	sunny	collision in crossing direction
202	2011-03-21 17:30:00	Győr-Moson-Sopron	47.466911 17.304484	8408 17+000	serious injury	normal	sunny	collision in crossing direction
203	2011-03-22 08:50:00	Győr-Moson-Sopron	47.689805 17.643138	14 0+153	light injury	normal	sunny	collision with stopped vehicle
204	2011-03-22 09:10:00	Győr-Moson-Sopron	47.506833 17.081222	8611 10+884	light injury	normal	sunny	collision in crossing direction
205	2011-03-22 18:45:00	Győr-Moson-Sopron	47.430528 17.47961	83 42+091	light injury	normal	sunny	track leaving, without solid object collision
206	2011-03-23 21:30:00	Győr-Moson-Sopron	47.526001 16.809977	8627-08-31 18:10:00	light injury	normal	sunny	track leaving, without solid object collision
207	2011-03-24 08:00:00	Heves	47.902102 20.366754	25 14+822	light injury	normal	sunny	pedestrian
208	2011-03-24 10:50:00	Győr-Moson-Sopron	47.589194 17.243249	86 147+000	light injury	normal	sunny	collision with turning
209	2011-03-24 11:55:00	Heves	47.725086 19.858814	M3 70+400	serious injury	normal	sunny	track leaving, without solid object collision
210	2011-03-24 15:45:00	Heves	47.769261 19.916373	3 80+248	serious injury	normal	sunny	collision in crossing direction
211	2011-03-24 21:40:00	Győr-Moson-Sopron	47.697277 17.63761	94000	light injury	normal	sunny	collision in same direction
212	2011-03-25 10:20:00	Győr-Moson-Sopron	47.875918 17.267616	94000	serious injury	normal	sunny	collision with turning
213	2011-03-25 15:00:00	Heves	47.560417 20.340917	3209 5+768	light injury	normal	sunny	track leaving, with solid object collision
214	2011-03-25 17:40:00	Győr-Moson-Sopron	47.68388 16.599644	94000	light injury	normal	sunny	pedestrian
215	2011-03-26 11:00:00	Heves	47.73206 20.034454	94000 0+000	serious injury	normal	sunny	collision with stopped vehicle
216	2011-03-26 18:38:00	Győr-Moson-Sopron	47.675833 17.684805		serious injury	normal	overcast	pedestrian
217	2011-03-26 21:45:00	Heves	47.857051 20.36764	2502 0+000	serious injury	normal	sunny	collosing opposite direction
218	2011-03-28 08:00:00	Heves	47.853221 20.366333	25 8+254	light injury	wet	overcast	track leaving, without solid object collision
219	2011-03-28 12:12:00	Győr-Moson-Sopron	47.675878 17.66929	81 81+920	serious injury	normal	sunny	collision in same direction
220	2011-03-28 15:15:00	Győr-Moson-Sopron	47.621306 17.303403	85 22+013	serious injury	normal	sunny	track leaving, with solid object collision
221	2011-03-28 17:10:00	Győr-Moson-Sopron	47.648305 17.665277	94000	light injury	normal	sunny	collision in crossing direction
222	2011-03-29 04:38:00	Győr-Moson-Sopron	47.689144 16.574007	94000	light injury	normal	overcast	collision in crossing direction
223	2011-03-29 07:07:00	Győr-Moson-Sopron	47.677027 17.642472	94000	light injury	normal	sunny	pedestrian
224	2011-03-29 13:35:00	Heves	47.78567 19.925857	2406 20+967	light injury	normal	sunny	pedestrian
225	2011-03-29 14:35:00	Győr-Moson-Sopron	47.660171 16.626635	84 115+200	serious injury	normal	sunny	collision with turning
226	2011-03-29 18:00:00	Heves	47.592823 20.581698	94000	serious injury	normal	sunny	pedestrian
227	2011-03-30 09:15:00	Győr-Moson-Sopron	47.683566 17.631373	94000	light injury	normal	sunny	pedestrian
228	2011-03-30 13:10:00	Heves	47.786194 19.923998	2406 20+876	serious injury	normal	sunny	pedestrian
229	2011-03-31 08:27:00	Győr-Moson-Sopron	47.684716 17.630557	94000	light injury	normal	sunny	pedestrian
230	2011-03-31 10:00:00	Heves	47.851627 20.327995	24129 6+643	light injury	normal	sunny	collosing opposite direction
231	2011-03-31 15:35:00	Győr-Moson-Sopron	47.672722 17.644249	94000	light injury	normal	sunny	slipping, carving, overturning on the road
232	2011-03-31 16:05:00	Győr-Moson-Sopron	47.6891 16.585666	94000	serious injury	normal	sunny	pedestrian
233	2011-03-31 16:55:00	Győr-Moson-Sopron	47.713277 17.623916	1401 1+022	light injury	normal	sunny	collision in same direction
234	2011-04-01 09:50:00	Győr-Moson-Sopron	47.685777 17.637333	94000	serious injury	normal	overcast	pedestrian
235	2011-04-01 10:30:00	Heves	47.848832 20.36925	25 7+672	light injury	wet	rainy	track leaving, with solid object collision
236	2011-04-01 11:30:00	Győr-Moson-Sopron	47.668639 17.644527	82 74+250	light injury	normal	sunny	collision in crossing direction
237	2011-04-01 15:10:00	Győr-Moson-Sopron	47.879798 17.271483	94000	light injury	wet	overcast	collision in crossing direction
238	2011-04-01 20:35:00	Győr-Moson-Sopron	47.683444 17.614277	94000	light injury	wet	overcast	slipping, carving, overturning on the road
239	2011-04-02 10:23:00	Győr-Moson-Sopron	47.686583 17.639694	94000	light injury	normal	sunny	collision in crossing direction
240	2011-04-03 12:05:00	Győr-Moson-Sopron	47.649859 16.658036	8518 22+008	serious injury	normal	sunny	collision in same direction
241	2011-04-03 13:10:00	Győr-Moson-Sopron	47.595867 16.782337	8612 30+499	light injury	normal	sunny	collision in crossing direction
242	2011-04-03 18:00:00	Győr-Moson-Sopron	47.593576 17.024607	85 43+560	light injury	normal	sunny	collision in crossing direction
243	2011-04-04 19:40:00	Heves	47.934299 20.098543	94000	serious injury	normal	overcast	slipping, carving, overturning on the road
244	2011-04-05 02:35:00	Győr-Moson-Sopron	47.671972 17.643055	94000	light injury	normal	overcast	collision with stopped vehicle
245	2011-04-05 12:20:00	Győr-Moson-Sopron	47.849838 17.428925	1401 24+080	light injury	normal	sunny	collision in crossing direction
246	2011-04-05 19:05:00	Győr-Moson-Sopron	47.64825 17.622194	83 70+582	light injury	normal	sunny	collision in same direction
247	2011-04-06 07:30:00	Győr-Moson-Sopron	47.862789 17.274304	94000	light injury	normal	sunny	pedestrian
248	2011-04-06 07:41:00	Heves	47.780613 19.923191	94000	light injury	normal	sunny	collision with turning
249	2011-04-06 19:20:00	Heves	47.845238 20.373333	25 7+181	serious injury	normal	sunny	collision with turning
250	2011-04-07 11:30:00	Győr-Moson-Sopron	47.634708 16.652903	84 112+400	light injury	normal	sunny	collision with turning
251	2011-04-07 14:54:00	Győr-Moson-Sopron	47.693139 17.628777	94000	light injury	normal	sunny	collision in same direction
252	2011-04-07 16:48:00	Győr-Moson-Sopron	47.688611 17.642416	94000	serious injury	normal	sunny	pedestrian
253	2011-04-07 17:42:00	Győr-Moson-Sopron	47.617031 16.683998	84 110+384	fatal	normal	sunny	collosing opposite direction
254	2011-04-07 18:15:00	Győr-Moson-Sopron	47.682577 16.586434	8518 20+943	serious injury	normal	sunny	collision with turning
255	2011-04-07 18:30:00	Győr-Moson-Sopron	47.682203 16.55021	94000	light injury	normal	sunny	collision in same direction
256	2011-04-08 09:20:00	Heves	47.77901 19.917482	94000	serious injury	normal	sunny	collision in crossing direction
257	2011-04-08 11:30:00	Heves	47.830915 20.356389	25 5+049	serious injury	normal	sunny	track leaving, without solid object collision
258	2011-04-08 15:20:00	Győr-Moson-Sopron	47.681622 16.592836	94000	serious injury	normal	overcast	pedestrian
259	2011-04-09 11:38:00	Heves	47.892054 19.976389	24 18+990	serious injury	normal	sunny	slipping, carving, overturning on the road
260	2011-04-09 12:30:00	Heves	47.770361 19.926316	94000	light injury	normal	sunny	collision in crossing direction
261	2011-04-09 13:00:00	Heves	47.888248 20.306694	24128 11+500	serious injury	normal	sunny	track leaving, with solid object collision
262	2011-04-09 13:40:00	Győr-Moson-Sopron	47.670064 17.648429	82 73+071	light injury	normal	sunny	collision in same direction
263	2011-04-09 15:40:00	Heves	47.774916 19.917944	94000	light injury	normal	overcast	pedestrian
264	2011-04-09 21:00:00	Győr-Moson-Sopron	47.45913 16.816138	84 89+602	serious injury	normal	overcast	slipping, carving, overturning on the road
265	2011-04-10 17:23:00	Győr-Moson-Sopron	47.64235 16.665736	8525-12-31 15:29:00	fatal	normal	sunny	collision in crossing direction
266	2011-04-10 18:10:00	Heves	47.88611 20.375833	94000	light injury	normal	sunny	collision in crossing direction
267	2011-04-10 19:30:00	Győr-Moson-Sopron	47.613826 17.245659	94000	serious injury	normal	sunny	collision in same direction
268	2011-04-10 19:30:00	Heves	47.740383 20.415755	94000	serious injury	normal	sunny	collision with stopped vehicle
269	2011-04-11 06:55:00	Győr-Moson-Sopron	47.685246 16.581735	94000	serious injury	normal	overcast	pedestrian
270	2011-04-12 07:30:00	Győr-Moson-Sopron	47.683488 17.622042	94000	light injury	normal	sunny	pedestrian
271	2011-04-12 13:45:00	Győr-Moson-Sopron	47.703277 17.690333	94000	light injury	wet	overcast	collosing opposite direction
272	2011-04-12 15:45:00	Heves	47.649753 20.669151	33 28+007	serious injury	normal	sunny	track leaving, with solid object collision
273	2011-04-12 17:05:00	Győr-Moson-Sopron	47.677 17.642499	94000	light injury	wet	rainy	pedestrian
274	2011-04-13 08:36:00	Győr-Moson-Sopron	47.49097 16.791812	84 93+703	fatal	normal	sunny	collosing opposite direction
275	2011-04-13 09:10:00	Heves	47.798444 19.880416	2406 17+207	light injury	normal	sunny	track leaving, without solid object collision
276	2011-04-14 03:20:00	Heves	47.798277 19.877028	2406 17+020	light injury	normal	sunny	track leaving, without solid object collision
277	2011-04-14 07:45:00	Győr-Moson-Sopron	47.525217 17.078533	8611-07-31 17:27:00	serious injury	wet	rainy	track leaving, without solid object collision
278	2011-04-15 12:40:00	Győr-Moson-Sopron	47.732639 17.819527	94000	light injury	normal	sunny	collision with turning
279	2011-04-15 14:50:00	Győr-Moson-Sopron	47.459244 16.814088	84 89+400	light injury	normal	sunny	collision in same direction
280	2011-04-15 20:00:00	Heves	47.676551 20.523821	33 15+726	light injury	normal	sunny	collision in same direction
281	2011-04-16 12:15:00	Győr-Moson-Sopron	47.949136 17.34725	1407 8+364	serious injury	normal	sunny	track leaving, with solid object collision
282	2011-04-16 14:40:00	Heves	47.953721 20.082611	2411-02-28 22:02:00	serious injury	normal	overcast	track leaving, without solid object collision
283	2011-04-16 20:25:00	Győr-Moson-Sopron	47.739397 16.546795	84 128+350	light injury	normal	overcast	collision with turning
284	2011-04-17 05:00:00	Győr-Moson-Sopron	47.588494 16.862043	85 56+500	serious injury	normal	overcast	pedestrian
285	2011-04-17 11:45:00	Győr-Moson-Sopron	47.590575 16.888423		light injury	normal	sunny	track leaving, without solid object collision
286	2011-04-17 17:30:00	Győr-Moson-Sopron	47.519768 17.499911	8416-12-31 21:08:00	serious injury	normal	sunny	track leaving, without solid object collision
287	2011-04-18 07:15:00	Heves	48.055879 20.228806	25 40+818	serious injury	normal	sunny	collision with stopped vehicle
288	2011-04-18 13:54:00	Heves	47.906656 20.37193	94000	light injury	normal	sunny	pedestrian
289	2011-04-18 18:08:00	Győr-Moson-Sopron	47.552569 17.755811	8224-10-31 19:09:00	light injury	normal	sunny	track leaving, without solid object collision
290	2011-04-18 18:32:00	Győr-Moson-Sopron	47.685498 16.581908	94000	serious injury	normal	sunny	pedestrian
291	2011-04-20 09:45:00	Győr-Moson-Sopron	47.715629 17.649095	94000	serious injury	normal	sunny	collision in crossing direction
292	2011-04-20 13:20:00	Győr-Moson-Sopron	47.669305 17.646704	82 74+160	serious injury	normal	sunny	collision in same direction
293	2011-04-20 16:11:00	Heves	48.037413 20.102506	2305 2+266	serious injury	normal	sunny	collision with stopped vehicle
294	2011-04-21 09:40:00	Heves	47.816535 19.959291	24 5+287	serious injury	normal	sunny	collision with turning
295	2011-04-21 15:00:00	Győr-Moson-Sopron	47.587343 16.8783	94000	serious injury	normal	sunny	collision in same direction
296	2011-04-21 17:00:00	Győr-Moson-Sopron	47.869452 17.268744	94000	light injury	normal	sunny	collision in crossing direction
297	2011-04-21 18:00:00	Heves	47.811193 19.933639	94000	light injury	normal	sunny	pedestrian
298	2011-04-21 20:12:00	Győr-Moson-Sopron	47.905222 17.181333	10532 0+310	light injury	normal	sunny	collision in crossing direction
299	2011-04-22 08:15:00	Győr-Moson-Sopron	47.657093 17.522174		light injury	normal	sunny	collision of train and vehicle
300	2011-04-22 11:00:00	Győr-Moson-Sopron	47.624417 17.787916	81 70+674	light injury	normal	sunny	collision in same direction
301	2011-04-22 18:50:00	Győr-Moson-Sopron	47.589417 17.001469	85 45+404	light injury	normal	sunny	collision with turning
302	2011-04-23 10:05:00	Győr-Moson-Sopron	47.699329 17.548847	94000	light injury	normal	sunny	collision in crossing direction
303	2011-04-23 18:40:00	Heves	47.928165 20.094861	24 33+368	serious injury	normal	sunny	collision with stopped vehicle
304	2011-04-23 20:10:00	Győr-Moson-Sopron	47.687295 17.623391	94000	light injury	normal	sunny	collision in crossing direction
305	2011-04-24 01:40:00	Győr-Moson-Sopron	47.587555 16.867972	85 57+225	light injury	normal	sunny	track leaving, without solid object collision
306	2011-04-24 02:30:00	Heves	47.831221 19.969583	94000 0+000	light injury	normal	sunny	pedestrian
307	2011-04-24 06:00:00	Győr-Moson-Sopron	47.588429 17.52192	8418-04-30 20:34:00	serious injury	normal	sunny	collosing opposite direction
308	2011-04-24 13:00:00	Heves	47.848277 19.961583	24 11+348	light injury	normal	sunny	collision with turning
309	2011-04-24 16:30:00	Heves	47.904753 20.371552	25 15+088	serious injury	normal	sunny	collision in same direction
310	2011-04-24 16:55:00	Győr-Moson-Sopron	47.50309 17.225308	86 135+729	light injury	normal	sunny	collision in same direction
311	2011-04-25 13:15:00	Heves	47.81236 19.799889	2406-11-01 00:34:00	light injury	wet	overcast	track leaving, with solid object collision
312	2011-04-25 15:00:00	Győr-Moson-Sopron	47.643039 16.665261	8518 21+000	light injury	normal	overcast	collision in crossing direction
313	2011-04-26 08:40:00	Győr-Moson-Sopron	47.691666 16.590203	84 0+000	light injury	wet	rainy	other
314	2011-04-26 11:45:00	Győr-Moson-Sopron	47.687541 16.57888	94000	light injury	wet	rainy	collision in crossing direction
315	2011-04-26 13:45:00	Győr-Moson-Sopron	47.669666 17.64761	94000	light injury	normal	sunny	pedestrian
316	2011-04-26 14:45:00	Győr-Moson-Sopron	47.5066 17.080976	8603 14+798	light injury	wet	rainy	collision in crossing direction
317	2011-04-26 17:15:00	Heves	47.830416 20.091907	2416 13+525	light injury	normal	sunny	collision in crossing direction
318	2011-04-27 08:00:00	Heves	47.776205 19.918704	94000	light injury	normal	sunny	collision with turning
319	2011-04-27 12:25:00	Heves	47.846085 20.226489	2416 27+337	serious injury	normal	sunny	track leaving, without solid object collision
320	2011-04-27 18:45:00	Heves	47.76763 20.519961	M3 122+728	serious injury	normal	sunny	collision in same direction
321	2011-04-28 15:00:00	Győr-Moson-Sopron	47.717673 16.621644	94000	light injury	normal	sunny	collision with solid obstacle
322	2011-04-28 22:00:00	Győr-Moson-Sopron	47.681333 17.660999	94000	light injury	normal	sunny	collision with turning
323	2011-04-29 15:40:00	Győr-Moson-Sopron	47.661571 17.638805	83 72+543	light injury	wet	rainy	collision in same direction
324	2011-04-30 06:30:00	Heves	47.503389 20.49314	3213 0+325	serious injury	normal	sunny	collision in same direction
325	2011-04-30 09:33:00	Győr-Moson-Sopron	47.68871 16.586597	94000	light injury	normal	sunny	collision in same direction
326	2011-04-30 09:45:00	Győr-Moson-Sopron	47.62045 16.874549	94000	serious injury	wet	sunny	collision in crossing direction
327	2011-04-30 11:26:00	Győr-Moson-Sopron	47.569833 17.626138	8309 19+370	light injury	normal	sunny	collosing opposite direction
328	2011-04-30 13:40:00	Heves	47.772325 19.921828	3 80+782	light injury	normal	sunny	slipping, carving, overturning on the road
329	2011-04-30 14:15:00	Győr-Moson-Sopron	47.69285 17.630785	94000	serious injury	not a road	rainy	slipping, carving, overturning on the road
330	2011-05-01 13:15:00	Heves	47.779464 19.918012	94000	light injury	normal	sunny	track leaving, without solid object collision
331	2011-05-01 21:34:00	Győr-Moson-Sopron	47.647827 17.42309	94000	light injury	wet	overcast	track leaving, without solid object collision
332	2011-05-02 03:19:00	Heves	47.692638 20.082389	3204 15+250	fatal	normal	overcast	pedestrian
333	2011-05-02 08:45:00	Győr-Moson-Sopron	47.685034 17.640952	94000	light injury	normal	sunny	collision with turning
334	2011-05-02 16:05:00	Győr-Moson-Sopron	47.593504 16.904226	85 0+000	light injury	normal	sunny	collision in same direction
335	2011-05-03 08:45:00	Győr-Moson-Sopron	47.682577 16.586434	84 119+738	light injury	normal	overcast	collision in crossing direction
336	2011-05-03 09:10:00	Győr-Moson-Sopron	47.634611 17.669749	82 69+500	serious injury	normal	sunny	collision with turning
337	2011-05-03 15:25:00	Győr-Moson-Sopron	47.856966 17.289543	1406 1+100	serious injury	wet	overcast	collision in crossing direction
338	2011-05-03 16:50:00	Heves	47.725749 19.899917	3203-04-01	light injury	normal	overcast	collosing opposite direction
339	2011-05-04 06:55:00	Heves	47.775399 20.486688	94000	light injury	normal	overcast	collision in crossing direction
340	2011-05-04 09:04:00	Győr-Moson-Sopron	47.634242 17.611297	94000	serious injury	normal	sunny	pedestrian
341	2011-05-04 10:40:00	Győr-Moson-Sopron	47.861391 17.274703	1 160+500	light injury	normal	sunny	pedestrian
342	2011-05-04 16:40:00	Heves	47.810971 19.956722	24 4+700	serious injury	normal	sunny	track leaving, without solid object collision
343	2011-05-04 18:05:00	Heves	47.606722 20.282139	94000	serious injury	normal	sunny	collosing opposite direction
344	2011-05-05 17:44:00	Győr-Moson-Sopron	47.591729 16.872156	94000	fatal	normal	sunny	collision with turning
345	2011-05-06 08:10:00	Heves	47.839519 20.367363	25 6+392	light injury	normal	sunny	collision in same direction
346	2011-05-06 16:20:00	Heves	47.712322 20.423517	33 6+400	light injury	normal	sunny	collosing opposite direction
347	2011-05-06 17:35:00	Győr-Moson-Sopron	47.629887 16.734064	8518 0+000	serious injury	normal	sunny	track leaving, without solid object collision
348	2011-05-06 17:55:00	Győr-Moson-Sopron	47.675639 17.629944	821 0+000	serious injury	normal	sunny	track leaving, with solid object collision
349	2011-05-06 20:23:00	Győr-Moson-Sopron	47.879986 17.264175	94000	serious injury	normal	sunny	track leaving, without solid object collision
350	2011-05-06 22:00:00	Heves	47.785083 19.740666	2402-11-01 01:00:00	serious injury	normal	sunny	collision in crossing direction
351	2011-05-07 00:15:00	Győr-Moson-Sopron	47.845497 17.185107	8506 0+000	serious injury	normal	sunny	track leaving, without solid object collision
352	2011-05-07 08:45:00	Heves	47.881292 20.381543	25 11+999	light injury	wet	rainy	collision in same direction
353	2011-05-07 13:18:00	Győr-Moson-Sopron	47.652583 17.458277	85 0+000	serious injury	normal	sunny	track leaving, without solid object collision
354	2011-05-07 14:43:00	Győr-Moson-Sopron	47.6565 17.656721	82 72+400	serious injury	normal	sunny	slipping, carving, overturning on the road
355	2011-05-07 16:09:00	Győr-Moson-Sopron	47.56383 17.856423	8224 0+000	light injury	normal	sunny	track leaving, without solid object collision
356	2011-05-07 22:35:00	Győr-Moson-Sopron	47.594488 16.731117	8628-12-31 23:00:00	light injury	normal	sunny	collision with stopped vehicle
357	2011-05-08 17:45:00	Győr-Moson-Sopron	47.842276 17.230672	86 182+500	light injury	normal	sunny	collision with turning
358	2011-05-10 17:25:00	Győr-Moson-Sopron	47.562683 17.180004	8601-03-31 21:00:00	serious injury	normal	sunny	collision in crossing direction
359	2011-05-10 21:03:00	Győr-Moson-Sopron	47.67664 17.642593	94000	serious injury	normal	sunny	pedestrian
360	2011-05-11 10:40:00	Győr-Moson-Sopron	47.618022 16.887686	8518-02-28 20:00:00	light injury	normal	sunny	pedestrian
361	2011-05-11 15:20:00	Győr-Moson-Sopron	47.694502 16.575395	94000	light injury	normal	sunny	pedestrian
362	2011-05-11 16:10:00	Győr-Moson-Sopron	47.687274 17.649159	821 2+200	fatal	normal	sunny	collision in crossing direction
363	2011-05-11 18:15:00	Heves	47.793227 19.931992	94000	light injury	normal	sunny	collision in crossing direction
364	2011-05-11 20:45:00	Heves	47.705265 20.079971	M3 87+950	serious injury	normal	sunny	collision in same direction
365	2011-05-12 02:10:00	Heves	47.89307 20.377514	94000	light injury	normal	sunny	collision in crossing direction
366	2011-05-12 03:10:00	Győr-Moson-Sopron	49.444298 17.614117	M15 0+000	light injury	normal	sunny	collosing opposite direction
367	2011-05-13 09:00:00	Győr-Moson-Sopron	47.549306 17.752749	8224-10-31 15:10:00	serious injury	not a road	sunny	collision with stopped vehicle
368	2011-05-13 11:30:00	Győr-Moson-Sopron	47.69091 16.604771	94000	light injury	normal	sunny	pedestrian
369	2011-05-13 14:25:00	Győr-Moson-Sopron	47.604873 16.697166	94000	light injury	normal	sunny	collosing opposite direction
370	2011-05-13 14:37:00	Győr-Moson-Sopron	47.681876 17.643417	94000	light injury	normal	sunny	collision in same direction
371	2011-05-13 16:55:00	Heves	47.790524 19.923795	94000	light injury	normal	sunny	collision in crossing direction
372	2011-05-13 17:25:00	Győr-Moson-Sopron	47.844999 17.282555	1 160+000	light injury	normal	sunny	collision with turning
373	2011-05-13 17:25:00	Heves	47.784055 19.927555	94000	serious injury	normal	sunny	collision in crossing direction
374	2011-05-13 22:00:00	Heves	47.717161 20.266569	M3 0+000	light injury	normal	overcast	collision in same direction
375	2011-05-14 09:55:00	Győr-Moson-Sopron	47.646192 17.246656	86 153+800	light injury	normal	sunny	collision with turning
376	2011-05-14 10:35:00	Győr-Moson-Sopron	47.663861 17.510666	85 5+300	serious injury	normal	sunny	collision in same direction
377	2011-05-14 11:20:00	Győr-Moson-Sopron	47.587608 17.033797	94000	light injury	normal	sunny	collision with turning
378	2011-05-14 19:40:00	Heves	47.794543 20.000769	94000	serious injury	normal	sunny	collosing opposite direction
379	2011-05-14 21:30:00	Győr-Moson-Sopron	47.518278 17.752694	82 54+700	light injury	wet	rainy	collision with stopped vehicle
380	2011-05-15 09:00:00	Győr-Moson-Sopron	47.555767 16.836578	8627 23+800	light injury	wet	overcast	collosing opposite direction
381	2011-05-15 10:25:00	Győr-Moson-Sopron	47.692324 17.673259	94000	light injury	wet	rainy	slipping, carving, overturning on the road
382	2011-05-16 06:45:00	Heves	47.736767 19.98003	3204-04-30 22:00:00	serious injury	wet	rainy	collosing opposite direction
383	2011-05-16 11:10:00	Heves	47.728182 20.414598	33 4+500	light injury	wet	overcast	collosing opposite direction
384	2011-05-16 16:45:00	Győr-Moson-Sopron	47.672908 16.603732	94000	serious injury	normal	sunny	collision in crossing direction
385	2011-05-17 00:20:00	Győr-Moson-Sopron	47.669647 16.617644	86107 0+000	light injury	normal	overcast	track leaving, with solid object collision
386	2011-05-18 07:10:00	Heves	47.85077 20.23142	94000	light injury	other	sunny	collision in crossing direction
387	2011-05-18 11:40:00	Heves	47.784599 19.914535	94000	light injury	normal	sunny	collision in crossing direction
388	2011-05-18 17:45:00	Győr-Moson-Sopron	47.667276 17.637922	94000	light injury	normal	sunny	collision in crossing direction
389	2011-05-18 20:00:00	Heves	47.660916 19.662167	94000	light injury	normal	sunny	collision in crossing direction
390	2011-05-19 16:45:00	Győr-Moson-Sopron	47.673772 17.629761	94000	serious injury	normal	sunny	collision with turning
391	2011-05-19 17:10:00	Győr-Moson-Sopron	47.694694 17.631305	94000	serious injury	normal	sunny	collision with stopped vehicle
392	2011-05-20 10:00:00	Győr-Moson-Sopron	47.88536 17.308694	1401 1+100	light injury	normal	sunny	collision with turning
393	2011-05-20 11:30:00	Győr-Moson-Sopron	47.673286 17.65011	94000	light injury	normal	sunny	collision in same direction
394	2011-05-20 12:30:00	Heves	47.999621 20.182018	2413 12+1086	serious injury	normal	sunny	track leaving, with solid object collision
395	2011-05-20 17:30:00	Heves	47.732525 20.012638	3204-06-30 17:00:00	light injury	normal	sunny	track leaving, with solid object collision
396	2011-05-21 05:15:00	Győr-Moson-Sopron	47.649928 17.868111	8136 40+300	light injury	normal	sunny	track leaving, with solid object collision
397	2011-05-21 13:15:00	Győr-Moson-Sopron	47.691055 17.637563	94000	serious injury	normal	sunny	collision in crossing direction
398	2011-05-21 19:20:00	Győr-Moson-Sopron	47.682836 17.631989	94000	serious injury	normal	overcast	pedestrian
399	2011-05-22 03:50:00	Heves	47.600028 20.292334	31 112+404	light injury	normal	sunny	track leaving, without solid object collision
400	2011-05-22 17:47:00	Győr-Moson-Sopron	47.721277 17.649666	94000	serious injury	normal	sunny	track leaving, without solid object collision
401	2011-05-22 20:10:00	Heves	47.584194 19.697333	32 31+121	serious injury	normal	sunny	track leaving, without solid object collision
402	2011-05-23 06:10:00	Győr-Moson-Sopron	47.626377 16.742517	8518 16+300	light injury	wet	overcast	track leaving, without solid object collision
403	2011-05-23 09:30:00	Győr-Moson-Sopron	47.62698 16.822656	85 0+000	serious injury	not a road	sunny	pedestrian
404	2011-05-23 12:50:00	Győr-Moson-Sopron	47.691661 17.640415	94000	light injury	normal	sunny	collision in crossing direction
405	2011-05-23 13:20:00	Győr-Moson-Sopron	47.612861 17.680986	82 0+000	light injury	normal	sunny	collision in same direction
406	2011-05-24 12:20:00	Heves	47.889908 20.380263	25 13+000	light injury	normal	sunny	collision in same direction
407	2011-05-24 13:55:00	Győr-Moson-Sopron	47.682577 16.586434	8644-12-31 17:00:00	light injury	normal	sunny	collision with turning
408	2011-05-24 16:00:00	Győr-Moson-Sopron	47.692485 16.580595	94000	light injury	normal	sunny	collision in crossing direction
409	2011-05-24 16:40:00	Heves	47.706472 20.020417	M3 83+250	serious injury	normal	sunny	track leaving, without solid object collision
410	2011-05-24 17:18:00	Győr-Moson-Sopron	47.723257 17.657441	94000	serious injury	normal	sunny	slipping, carving, overturning on the road
411	2011-05-24 17:25:00	Heves	47.954165 20.276722	2413-02-28 22:00:00	light injury	normal	sunny	collision with turning
412	2011-05-24 18:35:00	Győr-Moson-Sopron	47.667116 17.657867	94000	light injury	normal	sunny	not driver accident
413	2011-05-25 06:04:00	Győr-Moson-Sopron	47.589056 17.583666	83 0+000	light injury	normal	sunny	collision in same direction
414	2011-05-25 06:15:00	Heves	47.869152 20.427026	2503 3+760	light injury	normal	sunny	collision with turning
415	2011-05-25 11:48:00	Győr-Moson-Sopron	47.607475 17.244778	86 0+149	light injury	normal	sunny	collision in crossing direction
416	2011-05-25 16:25:00	Heves	47.709651 20.185445	M3 95+939	serious injury	normal	sunny	track leaving, without solid object collision
417	2011-05-25 19:25:00	Győr-Moson-Sopron	47.712222 17.627249	1401 0+700	serious injury	normal	sunny	pedestrian
418	2011-05-26 08:30:00	Heves	47.906259 20.36302	94000	light injury	normal	sunny	collision with turning
419	2011-05-26 09:28:00	Győr-Moson-Sopron	47.689138 16.583881	94000	serious injury	normal	sunny	pedestrian
420	2011-05-26 14:35:00	Győr-Moson-Sopron	47.666333 17.665444	94000	fatal	normal	sunny	collision with turning
421	2011-05-26 19:00:00	Heves	47.835473 19.737107	2406-04-30 22:00:00	light injury	normal	sunny	collosing opposite direction
422	2011-05-27 07:29:00	Győr-Moson-Sopron	47.683337 16.588057	94000	serious injury	normal	sunny	pedestrian
423	2011-05-27 14:50:00	Győr-Moson-Sopron	47.682592 16.579865	86107 3+100	light injury	normal	sunny	collision in crossing direction
424	2011-05-27 15:20:00	Heves	47.780346 19.936592	94000	light injury	normal	sunny	collision in crossing direction
425	2011-05-27 16:00:00	Győr-Moson-Sopron	47.669301 16.588805	94000	light injury	normal	sunny	pedestrian
426	2011-05-27 16:15:00	Győr-Moson-Sopron	47.588129 17.030303	94000	light injury	normal	sunny	collision with turning
427	2011-05-27 17:10:00	Győr-Moson-Sopron	47.840977 17.287894	1 160+000	serious injury	normal	sunny	collosing opposite direction
428	2011-05-27 21:30:00	Győr-Moson-Sopron	47.593249 17.025972	85 0+000	serious injury	wet	overcast	pedestrian
429	2011-05-28 06:30:00	Győr-Moson-Sopron	47.67867 17.637093	94000	light injury	normal	overcast	track leaving, with solid object collision
430	2011-05-28 13:04:00	Heves	47.650555 20.671112	33 28+240	light injury	normal	sunny	track leaving, without solid object collision
431	2011-05-29 15:20:00	Győr-Moson-Sopron	47.674617 17.654982	94000	light injury	normal	sunny	slipping, carving, overturning on the road
432	2011-05-30 15:20:00	Heves	48.077498 20.360611	2506-09-30 18:00:00	fatal	normal	sunny	collosing opposite direction
433	2011-05-31 05:20:00	Heves	47.787562 20.060396		light injury	normal	sunny	collision in crossing direction
434	2011-05-31 09:40:00	Heves	47.875082 20.401472	2501 2+685	light injury	normal	sunny	collision with turning
435	2011-05-31 10:12:00	Győr-Moson-Sopron	47.687777 17.648499	94000	light injury	not a road	sunny	pedestrian
436	2011-05-31 13:30:00	Győr-Moson-Sopron	47.868113 17.27848	94000	light injury	normal	sunny	collision in crossing direction
437	2011-05-31 18:00:00	Győr-Moson-Sopron	47.687277 17.623333	94000	light injury	normal	sunny	collision in crossing direction
438	2011-05-31 19:30:00	Heves	48.104026 20.039555	2305 11+783	light injury	wet	overcast	collision in same direction
439	2011-06-01 05:50:00	Heves	47.972861 20.415436	2505-04-30 20:27:00	serious injury	normal	overcast	collision in crossing direction
440	2011-06-01 08:45:00	Heves	47.797005 19.888784	2406 17+870	serious injury	normal	sunny	collosing opposite direction
441	2011-06-01 16:42:00	Győr-Moson-Sopron	47.667583 17.656471	94000	serious injury	normal	sunny	collision in crossing direction
442	2011-06-02 02:45:00	Heves	47.672583 19.637166	M3 52+150	fatal	normal	sunny	collision in same direction
443	2011-06-02 08:20:00	Heves	47.865517 20.432114	2503-03-31 23:00:00	serious injury	normal	sunny	collision in crossing direction
444	2011-06-02 11:30:00	Heves	48.07597 20.20725	25 46+640	serious injury	other	sunny	track leaving, with solid object collision
445	2011-06-02 17:15:00	Győr-Moson-Sopron	47.65427 16.892848	8531-03-31 20:00:00	light injury	normal	overcast	track leaving, with solid object collision
446	2011-06-02 18:01:00	Győr-Moson-Sopron	47.665166 17.65636	94000	serious injury	normal	sunny	collision in crossing direction
447	2011-06-02 21:58:00	Győr-Moson-Sopron	47.861349 17.274691	1 160+500	light injury	normal	overcast	collision with turning
448	2011-06-03 16:00:00	Heves	47.919966 20.306417	24 55+085	light injury	normal	sunny	collision in same direction
449	2011-06-03 17:20:00	Heves	47.816285 19.959291	24 5+265	light injury	normal	sunny	collision with turning
450	2011-06-03 18:15:00	Heves	47.734173 20.271158	94000	serious injury	normal	sunny	collision in crossing direction
451	2011-06-03 21:35:00	Heves	47.701083 19.81425	3 69+294	serious injury	normal	sunny	track leaving, with solid object collision
452	2011-06-04 10:00:00	Heves	47.595455 20.291855	94000	serious injury	normal	sunny	collision in crossing direction
453	2011-06-04 10:50:00	Győr-Moson-Sopron	47.579325 17.865769	81 62+900	light injury	normal	sunny	track leaving, without solid object collision
454	2011-06-04 12:25:00	Heves	47.841415 20.229444	2417-08-31 16:50:00	light injury	normal	sunny	collision with turning
455	2011-06-04 13:20:00	Győr-Moson-Sopron	47.700083 17.678972	94000	serious injury	normal	sunny	pedestrian
456	2011-06-04 13:40:00	Heves	47.686047 19.734619	M3 60+000	light injury	normal	sunny	track leaving, without solid object collision
457	2011-06-04 18:50:00	Heves	47.773027 19.922666	3 80+900	light injury	normal	sunny	track leaving, without solid object collision
458	2011-06-04 19:25:00	Győr-Moson-Sopron	47.348723 17.760777	83118 0+000	serious injury	normal	overcast	slipping, carving, overturning on the road
459	2011-06-04 20:00:00	Heves	47.893791 20.360803	94000	serious injury	normal	sunny	slipping, carving, overturning on the road
460	2011-06-04 22:25:00	Heves	47.769194 19.916389	3 80+244	light injury	normal	sunny	collision in crossing direction
461	2011-06-05 01:30:00	Győr-Moson-Sopron	47.668419 17.669412	94000	light injury	wet	overcast	collosing opposite direction
462	2011-06-05 06:04:00	Győr-Moson-Sopron	47.677 17.658138	94000	light injury	normal	sunny	track leaving, without solid object collision
463	2011-06-06 18:30:00	Heves	47.672877 19.693255	94000	light injury	wet	overcast	collision with stopped vehicle
464	2011-06-06 20:15:00	Heves	47.972883 20.344969	25 0+000	light injury	wet	overcast	track leaving, without solid object collision
465	2011-06-06 21:15:00	Győr-Moson-Sopron	47.697444 17.730277	94000	serious injury	normal	sunny	collision with solid obstacle
466	2011-06-06 21:20:00	Heves	47.894027 20.38498	94000	fatal	not a road	overcast	slipping, carving, overturning on the road
467	2011-06-07 05:47:00	Győr-Moson-Sopron	47.682881 17.699523	94000	serious injury	normal	sunny	collision with turning
468	2011-06-07 07:14:00	Heves	47.967597 20.34929	25 22+846	light injury	oily	overcast	track leaving, with solid object collision
469	2011-06-08 08:15:00	Heves	47.650885 20.652946	3301 0+839	serious injury	wet	overcast	collision in crossing direction
470	2011-06-08 08:30:00	Győr-Moson-Sopron	47.700804 16.618005	94000	light injury	normal	sunny	track leaving, with solid object collision
471	2011-06-08 09:15:00	Győr-Moson-Sopron	47.592338 17.029514	85 43+153	light injury	normal	sunny	pedestrian
472	2011-06-08 10:50:00	Győr-Moson-Sopron	47.724774 16.561904	84 128+350	light injury	normal	sunny	collision in same direction
473	2011-06-08 10:50:00	Heves	47.783305 19.921833	94000	light injury	normal	overcast	collision in crossing direction
474	2011-06-08 13:15:00	Heves	47.972332 20.038666	2411-06-30 20:00:00	fatal	normal	sunny	track leaving, without solid object collision
475	2011-06-08 14:50:00	Győr-Moson-Sopron	47.592395 17.029667	85 43+153	light injury	normal	sunny	pedestrian
476	2011-06-08 17:10:00	Győr-Moson-Sopron	47.900844 17.258468	150 3+300	light injury	normal	sunny	pedestrian
477	2011-06-08 18:00:00	Győr-Moson-Sopron	47.673864 16.60401	86107 2+000	light injury	normal	sunny	collision with turning
478	2011-06-09 19:00:00	Győr-Moson-Sopron	47.660223 17.626464	94000	light injury	normal	overcast	track leaving, with solid object collision
479	2011-06-10 05:15:00	Heves	47.705527 19.796333	M3 65+050	serious injury	wet	rainy	track leaving, without solid object collision
480	2011-06-10 05:50:00	Heves	47.737414 20.088706	3206 0+490	light injury	wet	overcast	collosing opposite direction
481	2011-06-10 09:10:00	Heves	47.666548 19.689646	3 59+000	light injury	wet	overcast	pedestrian
482	2011-06-10 11:40:00	Győr-Moson-Sopron	47.682035 17.610911	94000	light injury	normal	sunny	collision in crossing direction
483	2011-06-10 12:05:00	Győr-Moson-Sopron	47.380418 17.871388	82 0+000	light injury	normal	sunny	collision in same direction
484	2011-06-10 17:50:00	Győr-Moson-Sopron	47.677778 17.646694	94000	serious injury	normal	sunny	collision in crossing direction
485	2011-06-10 21:20:00	Heves	47.700128 20.435902	94000	fatal	normal	overcast	slipping, carving, overturning on the road
486	2011-06-10 23:35:00	Heves	47.851386 20.234867	94000	serious injury	normal	overcast	track leaving, without solid object collision
487	2011-06-11 00:30:00	Győr-Moson-Sopron	47.740871 17.39145	94000	serious injury	normal	sunny	track leaving, with solid object collision
488	2011-06-11 01:00:00	Heves	47.849591 20.237951		serious injury	not a road	overcast	slipping, carving, overturning on the road
489	2011-06-11 09:13:00	Győr-Moson-Sopron	47.64436 16.6378	84 115+000	light injury	normal	sunny	collosing opposite direction
490	2011-06-11 09:35:00	Győr-Moson-Sopron	47.488834 17.634999	8308-08-31 21:00:00	light injury	normal	sunny	collision in crossing direction
491	2011-06-11 09:50:00	Heves	47.668199 19.679982	3 58+184	light injury	normal	overcast	collision in same direction
492	2011-06-11 11:20:00	Heves	48.082642 20.228792	25 49+500	serious injury	normal	overcast	track leaving, without solid object collision
493	2011-06-12 11:10:00	Heves	47.723324 20.323681	M3 106+530	light injury	normal	sunny	track leaving, without solid object collision
494	2011-06-12 13:29:00	Győr-Moson-Sopron	47.432232 17.826838	82 43+630	serious injury	normal	sunny	collision with turning
495	2011-06-12 17:35:00	Győr-Moson-Sopron	47.686516 16.580901	94000	serious injury	normal	sunny	slipping, carving, overturning on the road
496	2011-06-12 22:10:00	Heves	47.681889 19.75825	3 63+950	serious injury	normal	sunny	pedestrian
497	2011-06-12 23:40:00	Heves	47.728954 19.97455	M3 79+150	serious injury	normal	sunny	collision with animals
498	2011-06-13 16:00:00	Heves	47.802584 20.007772	2416-04-30 20:35:00	light injury	normal	sunny	collision in crossing direction
499	2011-06-13 17:00:00	Heves	47.706532 19.80254	M3 65+600	light injury	normal	sunny	collision in same direction
500	2011-06-13 19:26:00	Győr-Moson-Sopron	47.6255 17.675138	82 68+800	light injury	normal	sunny	collision with solid obstacle
501	2011-06-14 16:00:00	Heves	47.781783 19.923531	94000	light injury	wet	overcast	pedestrian
502	2011-06-14 18:35:00	Heves	47.939937 20.367446	25 19+340	light injury	normal	sunny	pedestrian
503	2011-06-14 18:55:00	Heves	47.780936 19.928923	24 0+653	light injury	normal	sunny	collision in crossing direction
504	2011-06-14 20:40:00	Győr-Moson-Sopron	47.616389 17.603027	94000	light injury	normal	sunny	slipping, carving, overturning on the road
505	2011-06-15 19:25:00	Heves	47.790504 19.91268	2406 19+850	serious injury	normal	sunny	collision in crossing direction
506	2011-06-15 19:40:00	Győr-Moson-Sopron	47.612361 17.254333	85 25+868	light injury	normal	sunny	collision in crossing direction
507	2011-06-16 06:40:00	Heves	47.985413 20.224884	2413-09-01 01:02:00	light injury	normal	sunny	track leaving, without solid object collision
508	2011-06-16 08:00:00	Heves	47.798087 19.690087	2405-03-31 23:14:00	serious injury	normal	sunny	collision in crossing direction
509	2011-06-16 10:15:00	Heves	47.6335 19.729861	32 4+300	light injury	normal	sunny	collision with turning
510	2011-06-16 12:40:00	Győr-Moson-Sopron	47.755777 17.642222		light injury	normal	sunny	collision with turning
511	2011-06-16 15:03:00	Győr-Moson-Sopron	47.894211 17.263164	150 2+630	serious injury	normal	sunny	track leaving, with solid object collision
512	2011-06-16 15:30:00	Győr-Moson-Sopron	47.556384 17.015655		serious injury	normal	sunny	slipping, carving, overturning on the road
513	2011-06-16 19:55:00	Heves	47.682584 20.322244	94000 0+000	light injury	not a road	sunny	collision of train and vehicle
514	2011-06-16 22:08:00	Győr-Moson-Sopron	47.692444 17.658722	94000	light injury	normal	sunny	collision in crossing direction
515	2011-06-17 12:50:00	Győr-Moson-Sopron	47.871944 17.276611	94000	light injury	normal	sunny	collision in same direction
516	2011-06-17 14:55:00	Győr-Moson-Sopron	47.632083 17.59736	83 67+800	serious injury	normal	sunny	not driver accident
517	2011-06-17 16:47:00	Győr-Moson-Sopron	47.706111 17.526388	1 136+200	light injury	normal	sunny	collision in same direction
518	2011-06-17 19:00:00	Győr-Moson-Sopron	47.681527 17.628305	94000	light injury	normal	sunny	collision with turning
519	2011-06-18 10:00:00	Heves	47.791079 19.932061	94000	serious injury	normal	sunny	collision with stopped vehicle
520	2011-06-18 10:35:00	Heves	47.759027 19.899493	3 78+100	light injury	normal	sunny	collision with turning
521	2011-06-18 14:40:00	Heves	47.624504 19.680805	31121 9+050	light injury	normal	sunny	track leaving, with solid object collision
522	2011-06-18 16:05:00	Győr-Moson-Sopron	47.504278 17.509277	83 51+400	light injury	normal	sunny	collosing opposite direction
523	2011-06-19 10:45:00	Győr-Moson-Sopron	47.571056 17.579138	83 60+500	serious injury	wet	rainy	track leaving, with solid object collision
524	2011-06-19 12:00:00	Heves	47.844429 20.412291	2501-05-31 23:16:00	light injury	normal	sunny	track leaving, without solid object collision
525	2011-06-19 12:00:00	Győr-Moson-Sopron	47.588132 17.684981	94000	light injury	wet	overcast	track leaving, with solid object collision
526	2011-06-19 14:50:00	Heves	47.867859 20.405341	2501-02-28 19:18:00	light injury	normal	sunny	track leaving, without solid object collision
527	2011-06-19 17:50:00	Heves	47.927402 20.193052	24 42+200	light injury	oily	sunny	track leaving, without solid object collision
528	2011-06-19 18:30:00	Heves	47.741573 20.44346	M3 116+058	light injury	normal	overcast	track leaving, with solid object collision
529	2011-06-19 19:40:00	Győr-Moson-Sopron	47.718509 16.652136	8526-12-01 01:00:00	light injury	normal	sunny	pedestrian
530	2011-06-19 23:30:00	Győr-Moson-Sopron	47.991255 17.202977	M15 4+955	fatal	normal	sunny	collosing opposite direction
531	2011-06-20 05:40:00	Heves	47.885886 20.380868	25 12+512	serious injury	normal	sunny	collision in same direction
532	2011-06-20 17:15:00	Heves	47.976235 20.431293	94000	serious injury	normal	sunny	collision in crossing direction
533	2011-06-20 20:20:00	Győr-Moson-Sopron	47.569772 17.626168	8309 20+000	light injury	normal	sunny	track leaving, with solid object collision
534	2011-06-20 23:20:00	Győr-Moson-Sopron	47.690696 16.570991	94000	light injury	normal	overcast	collision with stopped vehicle
535	2011-06-21 07:45:00	Győr-Moson-Sopron	47.493359 16.753498	8627 16+000	serious injury	normal	overcast	track leaving, without solid object collision
536	2011-06-21 09:20:00	Heves	47.938314 20.366426	25 19+116	serious injury	normal	sunny	collision in same direction
537	2011-06-21 16:15:00	Győr-Moson-Sopron	47.665608 17.629079	94000	serious injury	normal	sunny	collision with turning
538	2011-06-22 01:00:00	Heves	47.91066 20.376528	2504 0+459	light injury	normal	overcast	collision in same direction
539	2011-06-22 08:30:00	Győr-Moson-Sopron	47.666263 17.014854	8529-08-01 00:10:00	light injury	normal	sunny	track leaving, with solid object collision
540	2011-06-22 10:15:00	Győr-Moson-Sopron	47.674941 17.6402	94000	serious injury	normal	sunny	collision in same direction
541	2011-06-22 19:15:00	Győr-Moson-Sopron	47.682083 17.655555	81 83+110	light injury	normal	sunny	collision in same direction
542	2011-06-22 19:55:00	Győr-Moson-Sopron	49.714077 20.097507	M1 123+244	light injury	normal	sunny	collision in same direction
543	2011-06-23 07:20:00	Győr-Moson-Sopron	47.559945 17.892944	81 59+900	light injury	normal	overcast	collosing opposite direction
544	2011-06-23 08:40:00	Heves	47.935469 20.108897	24 34+800	light injury	normal	sunny	collision with solid obstacle
545	2011-06-23 18:55:00	Győr-Moson-Sopron	47.666993 17.648103	94000	light injury	normal	sunny	collision in crossing direction
546	2011-06-24 05:57:00	Heves	47.762466 19.675594	2402 0+780	light injury	wet	sunny	collision with turning
547	2011-06-24 09:00:00	Győr-Moson-Sopron	47.685876 16.602064	94000	light injury	normal	sunny	collision in crossing direction
548	2011-06-24 10:15:00	Heves	47.77486 19.933083	3 81+721	light injury	normal	sunny	collision with stopped vehicle
549	2011-06-24 16:20:00	Győr-Moson-Sopron	47.683345 16.588014	94000	light injury	normal	sunny	collision in same direction
550	2011-06-24 18:05:00	Győr-Moson-Sopron	47.670694 17.642444	94000	light injury	normal	sunny	pedestrian
551	2011-06-25 01:05:00	Győr-Moson-Sopron	47.695583 17.628499	94000	light injury	normal	sunny	slipping, carving, overturning on the road
552	2011-06-25 04:00:00	Heves	47.747516 20.252422	3208 1+268	fatal	normal	overcast	pedestrian
553	2011-06-25 08:45:00	Győr-Moson-Sopron	47.691009 17.640842	94000	light injury	normal	sunny	collision in crossing direction
554	2011-06-25 09:10:00	Győr-Moson-Sopron	47.689689 17.641824	94000	light injury	normal	sunny	collision in crossing direction
555	2011-06-25 11:55:00	Heves	47.500556 20.491667	3209 23+300	light injury	normal	sunny	collision in crossing direction
556	2011-06-25 13:45:00	Heves	47.884113 20.398284	2501 1+662	light injury	wet	sunny	track leaving, without solid object collision
557	2011-06-25 16:20:00	Győr-Moson-Sopron	47.682804 17.642939	94000	light injury	wet	rainy	pedestrian
558	2011-06-25 21:20:00	Győr-Moson-Sopron	47.670735 17.660807	94000	light injury	normal	sunny	track leaving, with solid object collision
559	2011-06-26 10:24:00	Győr-Moson-Sopron	47.630006 16.733867	8518 15+700	light injury	wet	rainy	track leaving, without solid object collision
560	2011-06-26 10:28:00	Győr-Moson-Sopron	47.630075 16.733452	8518 15+700	serious injury	wet	rainy	track leaving, without solid object collision
561	2011-06-26 11:40:00	Heves	47.78815 19.925834	24136 0+269	light injury	normal	sunny	collision in same direction
562	2011-06-26 23:10:00	Heves	47.920689 19.99892	24 25+500	serious injury	normal	overcast	collision in same direction
563	2011-06-27 09:30:00	Győr-Moson-Sopron	47.44138 16.909301	8618-08-01 02:00:00	serious injury	normal	sunny	collosing opposite direction
564	2011-06-27 09:50:00	Győr-Moson-Sopron	47.675238 17.681826	94000	light injury	normal	sunny	pedestrian
565	2011-06-27 10:45:00	Heves	47.900386 20.374908	94000	light injury	not a road	sunny	slipping, carving, overturning on the road
566	2011-06-27 12:30:00	Heves	47.823988 20.053602	2416 10+376	fatal	normal	sunny	collision with stopped vehicle
567	2011-06-27 19:50:00	Heves	47.795954 19.997346	94000 0+000	light injury	normal	sunny	slipping, carving, overturning on the road
568	2011-06-28 07:05:00	Győr-Moson-Sopron	47.686568 16.593339	94000	light injury	normal	sunny	pedestrian
569	2011-06-28 07:05:00	Győr-Moson-Sopron	47.650132 17.666796	94000	serious injury	normal	sunny	collision in crossing direction
570	2011-06-28 12:15:00	Győr-Moson-Sopron	47.726533 17.222149	86 164+200	light injury	normal	sunny	track leaving, without solid object collision
571	2011-06-28 13:50:00	Győr-Moson-Sopron	47.722807 16.64897	8526-11-30 18:00:00	serious injury	normal	sunny	collision in crossing direction
572	2011-06-28 17:00:00	Heves	47.889961 20.370392	2416 43+028	serious injury	wet	rainy	collision in crossing direction
573	2011-06-28 18:18:00	Győr-Moson-Sopron	47.674709 16.602741	94000	light injury	normal	sunny	pedestrian
574	2011-06-29 09:45:00	Heves	47.752471 19.954611	3204-01-31 17:00:00	light injury	wet	overcast	collision in crossing direction
575	2011-06-29 14:43:00	Győr-Moson-Sopron	47.720833 17.503444	1 137+970	light injury	normal	sunny	track leaving, without solid object collision
576	2011-06-29 15:05:00	Heves	47.68675 19.664889	21 2+000	light injury	normal	sunny	collision with turning
577	2011-06-29 17:08:00	Győr-Moson-Sopron	47.805487 17.16466	86 176+750	light injury	normal	sunny	track leaving, with solid object collision
578	2011-06-29 17:20:00	Győr-Moson-Sopron	47.692944 17.64061	14 0+000	fatal	wet	overcast	collision with turning
579	2011-06-29 18:45:00	Győr-Moson-Sopron	47.883168 17.289384	1401 36+000	light injury	normal	sunny	collision with turning
580	2011-06-29 21:30:00	Győr-Moson-Sopron	47.493319 17.852643	8222 22+400	serious injury	normal	sunny	collosing opposite direction
581	2011-06-30 12:50:00	Heves	47.773183 19.955344	3 83+417	light injury	wet	rainy	track leaving, without solid object collision
582	2011-06-30 16:38:00	Győr-Moson-Sopron	47.460027 16.908888	8621 15+700	fatal	normal	overcast	track leaving, with solid object collision
583	2011-07-01 02:00:00	Győr-Moson-Sopron	48.056389 17.235001	M15 12+979	serious injury	normal	overcast	track leaving, without solid object collision
584	2011-07-01 09:10:00	Győr-Moson-Sopron	47.688937 17.635335	94000	serious injury	normal	sunny	pedestrian
585	2011-07-01 09:30:00	Győr-Moson-Sopron	47.687576 16.564388	94000	light injury	normal	sunny	collision in crossing direction
586	2011-07-01 15:15:00	Győr-Moson-Sopron	47.523809 16.934356	8621 0+000	light injury	normal	sunny	slipping, carving, overturning on the road
587	2011-07-01 19:30:00	Győr-Moson-Sopron	47.593555 17.023916	85 43+600	serious injury	normal	overcast	pedestrian
588	2011-07-01 21:23:00	Heves	47.808101 19.675478	21 16+200	fatal	wet	overcast	collosing opposite direction
589	2011-07-03 00:10:00	Heves	47.636916 20.329556	31 117+400	serious injury	wet	overcast	track leaving, without solid object collision
590	2011-07-03 01:25:00	Győr-Moson-Sopron	47.722046 17.63234	14 3+000	serious injury	normal	sunny	track leaving, with solid object collision
591	2011-07-03 03:30:00	Heves	47.790804 19.697042	2404-01-31 16:33:00	fatal	normal	overcast	track leaving, with solid object collision
592	2011-07-03 15:40:00	Heves	48.052667 20.157519	23 29+483	serious injury	normal	overcast	track leaving, without solid object collision
593	2011-07-04 10:05:00	Heves	47.720424 20.418785	33 5+510	light injury	normal	overcast	not driver accident
594	2011-07-04 13:55:00	Győr-Moson-Sopron	47.657 17.656416	82 72+500	light injury	normal	sunny	collision in same direction
595	2011-07-04 15:35:00	Heves	47.702292 20.427702	33 7+645	serious injury	normal	overcast	collision with turning
596	2011-07-04 16:35:00	Heves	47.779809 19.912307	94000	light injury	normal	sunny	pedestrian
597	2011-07-05 05:58:00	Győr-Moson-Sopron	47.557317 16.731325	84 103+000	fatal	wet	overcast	track leaving, with solid object collision
598	2011-07-05 08:45:00	Győr-Moson-Sopron	47.48747 16.69451	8626 0+009	serious injury	not a road	overcast	track leaving, without solid object collision
599	2011-07-05 13:10:00	Győr-Moson-Sopron	47.860268 17.266559	86 186+500	light injury	normal	sunny	collision in same direction
600	2011-07-05 17:00:00	Heves	47.779843 19.925926	94000	light injury	normal	sunny	collision with turning
601	2011-07-05 17:00:00	Győr-Moson-Sopron	47.674241 17.703701	8136 80+000	light injury	normal	sunny	collision in same direction
602	2011-07-06 12:10:00	Heves	47.872426 20.382929	25 11+000	light injury	normal	overcast	collision in crossing direction
603	2011-07-07 09:00:00	Győr-Moson-Sopron	47.857809 17.26936	94000	serious injury	not a road	sunny	pedestrian
604	2011-07-07 09:30:00	Heves	47.937054 20.235694	24 46+610	light injury	normal	sunny	collosing opposite direction
605	2011-07-07 13:35:00	Heves	48.139267 20.426125	2506 20+000	serious injury	normal	sunny	slipping, carving, overturning on the road
606	2011-07-07 16:30:00	Győr-Moson-Sopron	47.684472 17.64161	94000	light injury	normal	sunny	collosing opposite direction
607	2011-07-08 12:40:00	Győr-Moson-Sopron	47.678694 17.584666	1 130+000	light injury	normal	sunny	track leaving, without solid object collision
608	2011-07-08 15:40:00	Győr-Moson-Sopron	47.598694 17.591083	83 64+000	serious injury	normal	sunny	collosing opposite direction
609	2011-07-08 15:48:00	Győr-Moson-Sopron	47.666752 17.637692	94000	light injury	normal	sunny	pedestrian
610	2011-07-09 06:57:00	Győr-Moson-Sopron	47.868082 17.27855	94000	light injury	normal	sunny	collision in crossing direction
611	2011-07-09 09:10:00	Győr-Moson-Sopron	47.621529 16.77563	8518-12-01 01:00:00	light injury	normal	sunny	collosing opposite direction
612	2011-07-09 09:25:00	Győr-Moson-Sopron	49.929723 20.139165	82 45+800	light injury	normal	sunny	track leaving, without solid object collision
613	2011-07-09 10:30:00	Győr-Moson-Sopron	47.471917 17.793944	82 48+900	light injury	normal	sunny	collision in same direction
614	2011-07-09 18:00:00	Heves	47.707054 19.805645	M3 65+840	light injury	normal	sunny	collision of train and vehicle
615	2011-07-10 05:07:00	Győr-Moson-Sopron	47.475944 17.170499	86 130+000	fatal	normal	sunny	track leaving, with solid object collision
616	2011-07-10 16:25:00	Heves	47.836138 19.963111	24 8+300	serious injury	normal	sunny	collosing opposite direction
617	2011-07-10 17:45:00	Győr-Moson-Sopron	47.872968 17.437668	1405 8+000	light injury	normal	sunny	slipping, carving, overturning on the road
618	2011-07-10 17:59:00	Heves	48.106953 20.387581	2506 15+450	light injury	normal	overcast	track leaving, without solid object collision
619	2011-07-11 09:16:00	Heves	47.729082 20.360167	M3 109+400	serious injury	normal	sunny	track leaving, without solid object collision
620	2011-07-11 10:15:00	Heves	47.72991 20.371704	M3 110+230	fatal	normal	sunny	collision with stopped vehicle
621	2011-07-11 11:40:00	Győr-Moson-Sopron	47.683389 17.634194	94000	light injury	normal	sunny	collision with turning
622	2011-07-11 15:10:00	Győr-Moson-Sopron	47.833944 17.448861	1401 22+000	light injury	normal	sunny	track leaving, without solid object collision
623	2011-07-11 19:10:00	Győr-Moson-Sopron	47.696593 16.58104	94000	light injury	normal	sunny	collision with turning
624	2011-07-12 05:50:00	Győr-Moson-Sopron	47.679222 17.690222		light injury	normal	sunny	collision in same direction
625	2011-07-12 09:45:00	Heves	47.594043 20.588983	94000	serious injury	normal	sunny	pedestrian
626	2011-07-12 16:50:00	Győr-Moson-Sopron	47.617469 17.250848	94000 0+000	light injury	normal	sunny	collosing opposite direction
627	2011-07-12 20:05:00	Heves	47.930498 20.483138	2504-12-01 01:00:00	light injury	normal	sunny	collision with animals
628	2011-07-13 06:15:00	Győr-Moson-Sopron	49.653794 18.261893	M1 115+678	light injury	normal	sunny	collision in same direction
629	2011-07-13 08:45:00	Heves	47.900711 20.383124	94000	light injury	normal	sunny	collision in same direction
630	2011-07-13 08:50:00	Heves	47.908998 20.361944	24 60+550	light injury	normal	sunny	collision with turning
631	2011-07-13 15:35:00	Győr-Moson-Sopron	47.711341 16.610435	8527-03-01 01:00:00	light injury	normal	sunny	collision with turning
632	2011-07-14 04:44:00	Győr-Moson-Sopron	49.726266 18.271825	M1 1186+920	serious injury	normal	sunny	collision in same direction
633	2011-07-14 11:25:00	Heves	47.928887 20.096055	24 33+480	serious injury	normal	sunny	collision with turning
634	2011-07-14 17:00:00	Győr-Moson-Sopron	47.676478 17.655837	94000	serious injury	normal	sunny	collision in same direction
635	2011-07-15 17:45:00	Heves	47.703111 19.904194	3203-06-30 20:00:00	light injury	normal	sunny	collision in crossing direction
636	2011-07-16 04:10:00	Győr-Moson-Sopron	47.673555 17.641166	94000	light injury	normal	sunny	collision in crossing direction
637	2011-07-16 06:40:00	Győr-Moson-Sopron	47.827194 17.206944	86 180+000	light injury	normal	sunny	track leaving, without solid object collision
638	2011-07-16 11:55:00	Győr-Moson-Sopron	47.613749 17.019972	94000 0+000	serious injury	normal	sunny	collision in crossing direction
639	2011-07-16 13:30:00	Győr-Moson-Sopron	47.715375 16.613952		light injury	normal	sunny	collision in same direction
640	2011-07-16 17:10:00	Győr-Moson-Sopron	47.474416 17.167222	86 130+000	light injury	normal	sunny	track leaving, without solid object collision
641	2011-07-16 19:45:00	Győr-Moson-Sopron	47.682661 16.587797	94000	light injury	normal	sunny	collision in same direction
642	2011-07-17 14:00:00	Heves	47.722944 20.316556	M3 105+925	light injury	normal	sunny	collision with solid obstacle
643	2011-07-17 23:50:00	Győr-Moson-Sopron	47.767416 17.381916	M1 145+250	light injury	normal	sunny	track leaving, without solid object collision
644	2011-07-18 07:55:00	Győr-Moson-Sopron	47.591111 17.04561	85 42+050	light injury	wet	rainy	track leaving, with solid object collision
645	2011-07-18 09:30:00	Győr-Moson-Sopron	47.708666 17.63461	14 2+000	light injury	normal	sunny	collision in same direction
646	2011-07-18 11:15:00	Heves	47.812082 19.9325	24136 3+000	light injury	normal	sunny	not driver accident
647	2011-07-18 16:15:00	Győr-Moson-Sopron	47.587583 17.033805	94000 0+000	light injury	normal	sunny	collision with turning
648	2011-07-18 19:08:00	Győr-Moson-Sopron	47.656472 17.634138		light injury	normal	sunny	collision in crossing direction
649	2011-07-18 23:17:00	Győr-Moson-Sopron	47.926664 17.120201	1 171+000	serious injury	wet	overcast	collision in crossing direction
650	2011-07-19 07:00:00	Heves	47.779416 19.92175	94000	light injury	wet	sunny	collision in crossing direction
651	2011-07-19 11:00:00	Győr-Moson-Sopron	47.719964 16.650538	8526-11-01 01:00:00	serious injury	normal	sunny	pedestrian
652	2011-07-19 12:30:00	Győr-Moson-Sopron	47.687196 17.858218	M1 102+027	light injury	normal	sunny	track leaving, with solid object collision
653	2011-07-19 12:40:00	Győr-Moson-Sopron	47.690271 16.583166	94000	light injury	not a road	sunny	pedestrian
654	2011-07-19 19:10:00	Heves	47.923726 20.369015	25 17+497	light injury	normal	sunny	collision with solid obstacle
655	2011-07-20 05:16:00	Heves	47.764595 20.398272	3 124+000	light injury	wet	overcast	track leaving, with solid object collision
656	2011-07-20 05:50:00	Győr-Moson-Sopron	47.549613 17.220498	86 140+600	serious injury	wet	overcast	track leaving, with solid object collision
657	2011-07-20 17:30:00	Heves	47.778299 19.91838	94000	light injury	normal	sunny	collision with turning
658	2011-07-20 22:30:00	Győr-Moson-Sopron	47.614369 16.802431	8518-10-01 02:00:00	light injury	normal	overcast	collision with solid obstacle
659	2011-07-21 04:17:00	Győr-Moson-Sopron	47.611472 17.819777	81 68+000	light injury	wet	rainy	track leaving, with solid object collision
660	2011-07-21 08:00:00	Heves	47.700079 20.429777	94000	light injury	normal	overcast	collision with turning
661	2011-07-21 09:10:00	Győr-Moson-Sopron	47.630285 16.733	8518 0+000	serious injury	wet	rainy	track leaving, without solid object collision
662	2011-07-21 12:00:00	Győr-Moson-Sopron	47.683889 17.61336	94000	serious injury	wet	rainy	collision in crossing direction
663	2011-07-21 12:15:00	Heves	47.829888 20.122778	2416 16+474	light injury	normal	overcast	collision with turning
664	2011-07-21 14:45:00	Heves	47.772944 19.939555	3204 0+246	serious injury	normal	overcast	collosing opposite direction
665	2011-07-21 20:50:00	Győr-Moson-Sopron	47.52002 17.510866	8305-12-31 19:00:00	serious injury	wet	rainy	track leaving, without solid object collision
666	2011-07-21 21:10:00	Heves	47.84148 20.413388	2501 6+584	serious injury	normal	overcast	collision with turning
667	2011-07-22 07:00:00	Győr-Moson-Sopron	47.4414 17.071034	8611 23+100	serious injury	normal	sunny	track leaving, with solid object collision
668	2011-07-22 17:25:00	Győr-Moson-Sopron	47.682781 16.556878	94000	light injury	normal	sunny	collision in crossing direction
669	2011-07-22 21:50:00	Heves	47.71686 20.287167	3208-05-01 01:00:00	light injury	normal	overcast	track leaving, without solid object collision
670	2011-07-23 04:40:00	Győr-Moson-Sopron	47.601685 16.826121	8522 0+000	serious injury	normal	sunny	slipping, carving, overturning on the road
671	2011-07-23 12:45:00	Heves	48.0797 20.268316	25105 3+191	light injury	normal	sunny	track leaving, with solid object collision
672	2011-07-23 13:10:00	Heves	47.84613 20.41153	2501-06-01 01:06:00	serious injury	normal	sunny	collision with turning
673	2011-07-23 15:50:00	Heves	47.784221 19.922611	94000	serious injury	wet	rainy	track leaving, with solid object collision
674	2011-07-24 07:15:00	Győr-Moson-Sopron	47.541106 16.749723	84 100+000	light injury	normal	overcast	track leaving, with solid object collision
675	2011-07-24 13:00:00	Győr-Moson-Sopron	47.549613 17.220498	86 139+600	light injury	wet	rainy	track leaving, without solid object collision
676	2011-07-24 21:10:00	Győr-Moson-Sopron	47.869856 17.270673	94000	serious injury	wet	rainy	collision in crossing direction
677	2011-07-25 10:37:00	Győr-Moson-Sopron	47.592027 17.031777	85 43+000	serious injury	normal	overcast	collision in crossing direction
678	2011-07-25 13:00:00	Heves	47.665194 19.660944	3 56+660	light injury	normal	sunny	pedestrian
679	2011-07-25 13:05:00	Győr-Moson-Sopron	47.690569 16.590662	94000	serious injury	normal	sunny	pedestrian
680	2011-07-26 18:28:00	Győr-Moson-Sopron	47.702447 16.578605	84 123+000	serious injury	normal	overcast	collision in same direction
681	2011-07-27 08:30:00	Győr-Moson-Sopron	47.582877 16.714211	84 105+872	serious injury	normal	sunny	collision with turning
682	2011-07-27 15:10:00	Heves	47.737353 19.97858	3204 5+280	light injury	normal	sunny	track leaving, with solid object collision
683	2011-07-28 12:45:00	Győr-Moson-Sopron	47.617208 16.864807	8521-03-01 01:00:00	light injury	wet	rainy	collision with turning
684	2011-07-28 13:40:00	Győr-Moson-Sopron	47.672666 17.532444	85 3+000	light injury	wet	rainy	collision in same direction
685	2011-07-28 19:15:00	Heves	47.782225 19.927731	94000	light injury	normal	sunny	collision with turning
686	2011-07-29 16:15:00	Győr-Moson-Sopron	47.557977 16.841741	8627-05-01 02:00:00	light injury	normal	sunny	collision in crossing direction
687	2011-07-29 17:20:00	Győr-Moson-Sopron	47.502239 16.784135	8627 13+242	light injury	normal	sunny	collision in crossing direction
688	2011-07-29 22:00:00	Győr-Moson-Sopron	47.501834 17.842583	8222 22+000	serious injury	wet	rainy	pedestrian
689	2011-07-30 04:45:00	Győr-Moson-Sopron	47.642222 17.408833	85 13+000	serious injury	normal	sunny	collosing opposite direction
690	2011-07-30 05:55:00	Heves	47.715083 20.255139	M3 101+150	serious injury	wet	rainy	collision in same direction
691	2011-07-30 09:25:00	Heves	47.991077 20.327837	25 26+850	serious injury	wet	rainy	track leaving, with solid object collision
692	2011-07-30 10:35:00	Heves	47.5995 20.278111	3212-11-30 17:00:00	light injury	wet	rainy	collosing opposite direction
693	2011-07-30 10:55:00	Győr-Moson-Sopron	47.675921 16.598096	84 118+000	fatal	normal	overcast	collision with turning
694	2011-07-30 11:36:00	Heves	47.626599 20.601008	3213 19+887	light injury	normal	overcast	collision with turning
695	2011-07-30 15:40:00	Győr-Moson-Sopron	47.603027 17.200305	85 30+000	serious injury	normal	sunny	track leaving, without solid object collision
696	2011-07-31 00:30:00	Győr-Moson-Sopron	47.724638 17.491388	1 139+000	serious injury	wet	rainy	collision with stopped vehicle
697	2011-07-31 01:15:00	Győr-Moson-Sopron	47.597402 16.807656	85 61+100	serious injury	wet	rainy	track leaving, without solid object collision
698	2011-07-31 13:15:00	Győr-Moson-Sopron	47.622475 17.308241	85 20+000	light injury	normal	overcast	collision in same direction
699	2011-07-31 18:40:00	Heves	47.599023 20.26573	94000	serious injury	normal	overcast	track leaving, with solid object collision
700	2011-07-31 19:15:00	Heves	47.907102 20.377721	94000	light injury	normal	overcast	collision with stopped vehicle
701	2011-08-01 09:55:00	Győr-Moson-Sopron	47.611888 17.25236	94000	serious injury	not a road	sunny	pedestrian
702	2011-08-02 09:30:00	Heves	47.812196 19.867059	94000	light injury	normal	overcast	collision with turning
703	2011-08-02 10:40:00	Győr-Moson-Sopron	47.620287 17.299978	85 22+000	light injury	normal	sunny	collision in same direction
704	2011-08-02 12:40:00	Győr-Moson-Sopron	47.6623 16.899615	8531 0+005	serious injury	not a road	sunny	collosing opposite direction
705	2011-08-03 12:25:00	Heves	47.69105 20.392549	31 125+213	serious injury	normal	sunny	track leaving, without solid object collision
706	2011-08-03 14:35:00	Győr-Moson-Sopron	47.506777 17.081194	8611-09-30 16:30:00	light injury	normal	sunny	collision with turning
707	2011-08-03 20:40:00	Győr-Moson-Sopron	47.562647 16.836593	8612 24+087	light injury	normal	overcast	collision in crossing direction
708	2011-08-04 08:30:00	Heves	47.847465 20.239531	2416 28+450	serious injury	normal	sunny	collision with turning
709	2011-08-04 08:45:00	Heves	47.722649 20.309422	M3 105+460	light injury	normal	sunny	slipping, carving, overturning on the road
710	2011-08-04 10:55:00	Heves	47.913931 20.370056	25 16+410	light injury	normal	sunny	collision in same direction
711	2011-08-04 11:00:00	Győr-Moson-Sopron	47.598111 17.244027	86 148+500	light injury	wet	rainy	collision in same direction
712	2011-08-04 14:34:00	Győr-Moson-Sopron	47.852564 17.28062	1 161+000	light injury	wet	overcast	collision in crossing direction
713	2011-08-04 14:51:00	Győr-Moson-Sopron	47.687472 17.646777	81602 0+000	serious injury	wet	rainy	collision in same direction
714	2011-08-04 15:30:00	Győr-Moson-Sopron	47.587388 17.038555	94000	light injury	wet	overcast	collision in crossing direction
715	2011-08-04 16:30:00	Győr-Moson-Sopron	47.501778 17.221388	86 0+136	serious injury	wet	rainy	collision in same direction
716	2011-08-04 21:05:00	Heves	47.772416 19.921583	3 80+774	light injury	normal	sunny	pedestrian
717	2011-08-05 06:55:00	Győr-Moson-Sopron	47.722555 17.472638	M1 137+100	serious injury	normal	foggy	collision in same direction
718	2011-08-05 09:30:00	Heves	47.984249 20.02615	94000	light injury	normal	sunny	slipping, carving, overturning on the road
719	2011-08-05 12:05:00	Győr-Moson-Sopron	47.617194 17.287055	85 23+200	light injury	normal	sunny	collision in same direction
720	2011-08-05 17:10:00	Heves	47.778297 20.476483	3 130+600	light injury	normal	sunny	collision in crossing direction
721	2011-08-05 20:30:00	Győr-Moson-Sopron	47.621861 17.735916		serious injury	normal	sunny	slipping, carving, overturning on the road
722	2011-08-06 08:55:00	Heves	47.631111 20.618889	3213 21+300	serious injury	normal	sunny	track leaving, without solid object collision
723	2011-08-06 09:00:00	Győr-Moson-Sopron	47.562647 16.836593	8612 24+087	serious injury	normal	sunny	collision in crossing direction
724	2011-08-06 10:20:00	Győr-Moson-Sopron	47.961634 17.34307	1407 17+500	light injury	not a road	sunny	pedestrian
725	2011-08-06 11:45:00	Győr-Moson-Sopron	47.879385 17.264911	94000	serious injury	normal	sunny	collision in crossing direction
726	2011-08-06 12:20:00	Heves	47.77461 19.935055	3 81+870	serious injury	normal	sunny	track leaving, without solid object collision
727	2011-08-06 19:10:00	Győr-Moson-Sopron	47.643277 17.469499	84128 1+619	light injury	normal	sunny	collision in crossing direction
728	2011-08-07 13:50:00	Győr-Moson-Sopron	47.685684 17.637413	94000	light injury	normal	sunny	collision in crossing direction
729	2011-08-07 14:50:00	Heves	47.928386 20.368518	25 18+000	light injury	normal	overcast	collision with stopped vehicle
730	2011-08-07 15:25:00	Győr-Moson-Sopron	47.717944 17.615999		light injury	normal	sunny	collision in same direction
731	2011-08-07 15:30:00	Heves	47.738959 20.251954	94000	serious injury	normal	sunny	pedestrian
732	2011-08-07 17:50:00	Győr-Moson-Sopron	47.810347 17.200757	85105 1+000	light injury	wet	stormy	pedestrian
733	2011-08-07 20:05:00	Heves	47.831062 19.891026	94000	serious injury	normal	overcast	track leaving, without solid object collision
734	2011-08-07 20:24:00	Heves	47.737907 19.678032	2133-05-01 00:50:00	serious injury	normal	sunny	track leaving, without solid object collision
735	2011-08-08 07:35:00	Győr-Moson-Sopron	47.643889 17.615083	83 70+000	serious injury	normal	sunny	collision with turning
736	2011-08-08 09:27:00	Győr-Moson-Sopron	47.682445 16.569584	94000	serious injury	wet	stormy	pedestrian
737	2011-08-08 19:35:00	Heves	47.851517 20.366161	25 8+050	light injury	wet	overcast	track leaving, without solid object collision
738	2011-08-09 04:00:00	Győr-Moson-Sopron	47.699611 17.501333	M1 133+480	serious injury	wet	overcast	track leaving, with solid object collision
739	2011-08-09 07:45:00	Győr-Moson-Sopron	47.677666 17.552749	85 1+300	light injury	normal	sunny	collision in same direction
740	2011-08-09 11:00:00	Heves	47.486565 20.341562	94000	light injury	normal	sunny	collision with turning
741	2011-08-09 16:05:00	Győr-Moson-Sopron	47.604214 16.862388	8521 0+000	serious injury	normal	sunny	collosing opposite direction
742	2011-08-10 09:00:00	Győr-Moson-Sopron	47.682139 17.625888	94000	serious injury	normal	sunny	collision with turning
743	2011-08-10 13:00:00	Győr-Moson-Sopron	47.550362 17.74711	94000	light injury	normal	sunny	collision in crossing direction
744	2011-08-10 13:55:00	Heves	47.705078 19.902141	3203 7+482	light injury	normal	sunny	collosing opposite direction
745	2011-08-10 18:45:00	Győr-Moson-Sopron	47.585723 17.76061	8223-05-01 01:00:00	light injury	normal	sunny	collision in same direction
746	2011-08-10 20:27:00	Heves	47.781971 19.929611	24 0+800	light injury	normal	sunny	collision in same direction
747	2011-08-11 07:40:00	Győr-Moson-Sopron	47.67775 17.646694	94000	light injury	normal	sunny	collision in crossing direction
748	2011-08-11 09:15:00	Győr-Moson-Sopron	47.517341 17.51727	83 52+542	serious injury	normal	sunny	pedestrian
749	2011-08-11 15:00:00	Heves	47.734888 20.085778	94000	light injury	normal	sunny	track leaving, with solid object collision
750	2011-08-11 15:25:00	Győr-Moson-Sopron	47.668639 17.639749	94000	light injury	normal	sunny	collision in crossing direction
751	2011-08-11 21:15:00	Győr-Moson-Sopron	47.675402 16.598959	86107 2+000	light injury	normal	sunny	slipping, carving, overturning on the road
752	2011-08-12 07:30:00	Heves	47.778 19.922766	94000	light injury	normal	sunny	collision with turning
753	2011-08-12 10:42:00	Győr-Moson-Sopron	47.707888 17.647083	1301 1+336	light injury	normal	sunny	collision with turning
754	2011-08-12 12:00:00	Győr-Moson-Sopron	47.679083 17.645666	94000	light injury	normal	sunny	collision in crossing direction
755	2011-08-12 12:50:00	Győr-Moson-Sopron	47.670694 17.651221	94000	light injury	normal	sunny	not driver accident
756	2011-08-13 03:56:00	Heves	47.686166 19.922194	3203-10-01 01:00:00	serious injury	normal	overcast	track leaving, with solid object collision
757	2011-08-13 08:20:00	Győr-Moson-Sopron	47.670555 17.776666	M1 109+909	serious injury	normal	sunny	track leaving, without solid object collision
758	2011-08-13 11:00:00	Győr-Moson-Sopron	47.682577 16.586434	8518 20+000	light injury	normal	overcast	track leaving, without solid object collision
759	2011-08-13 11:15:00	Győr-Moson-Sopron	47.668749 16.991472	8529-09-30 23:39:00	light injury	normal	overcast	track leaving, with solid object collision
760	2011-08-13 20:20:00	Győr-Moson-Sopron	47.960956 17.116894	1501 2+320	serious injury	normal	sunny	collosing opposite direction
761	2011-08-13 20:55:00	Heves	47.600838 19.695531	31121 5+074	serious injury	normal	sunny	collision in same direction
762	2011-08-14 02:50:00	Győr-Moson-Sopron	47.942487 17.257928	M1 159+783	light injury	normal	sunny	collision in same direction
763	2011-08-14 10:15:00	Győr-Moson-Sopron	47.628389 16.661722	84 112+000	serious injury	normal	sunny	collision in same direction
764	2011-08-14 13:05:00	Heves	47.907712 20.239404	2418 23+300	serious injury	normal	sunny	track leaving, without solid object collision
765	2011-08-14 13:51:00	Heves	47.725249 20.338806	M3 107+750	serious injury	normal	sunny	track leaving, with solid object collision
766	2011-08-15 10:50:00	Heves	47.901553 20.379761	94000	light injury	normal	sunny	collision with stopped vehicle
767	2011-08-15 15:05:00	Heves	47.696027 19.781055	24141 0+855	light injury	normal	sunny	track leaving, without solid object collision
768	2011-08-15 19:15:00	Győr-Moson-Sopron	47.666 17.641194	94000	light injury	wet	rainy	collision with turning
769	2011-08-15 20:30:00	Heves	47.784416 19.931555	24312 0+053	serious injury	normal	sunny	track leaving, with solid object collision
770	2011-08-16 05:20:00	Győr-Moson-Sopron	47.556334 17.761971	94000	serious injury	wet	sunny	track leaving, without solid object collision
771	2011-08-16 06:45:00	Heves	47.868776 20.414111	2502-04-01	serious injury	normal	sunny	collision in same direction
772	2011-08-16 07:41:00	Heves	47.700277 20.261389	3207-02-28 16:00:00	light injury	normal	sunny	collision with animals
773	2011-08-16 09:45:00	Győr-Moson-Sopron	47.614778 16.688278	84603 0+200	light injury	normal	sunny	collision in crossing direction
774	2011-08-16 11:30:00	Heves	47.920937 20.370599	94000	light injury	normal	sunny	collision in crossing direction
775	2011-08-16 13:15:00	Heves	47.929657 20.220636	24 44+800	light injury	normal	sunny	collosing opposite direction
776	2011-08-16 23:12:00	Győr-Moson-Sopron	47.600222 17.524221	94000	serious injury	normal	sunny	track leaving, without solid object collision
777	2011-08-17 04:25:00	Győr-Moson-Sopron	47.606472 17.626666	94000	light injury	normal	sunny	collision with stopped vehicle
778	2011-08-17 14:25:00	Győr-Moson-Sopron	47.681056 16.586667	94000	light injury	normal	sunny	collision with stopped vehicle
779	2011-08-17 16:30:00	Győr-Moson-Sopron	47.684834 16.579028	94000	serious injury	normal	sunny	pedestrian
780	2011-08-17 17:53:00	Győr-Moson-Sopron	47.652278 17.701055	81 0+950	light injury	normal	sunny	collision in same direction
781	2011-08-17 20:25:00	Győr-Moson-Sopron	47.63225 17.361583	94000	light injury	normal	sunny	pedestrian
782	2011-08-18 09:07:00	Győr-Moson-Sopron	47.672362 17.512289	85 9+500	serious injury	normal	sunny	collision in same direction
783	2011-08-18 10:45:00	Heves	47.89903 20.373502	94000	light injury	normal	sunny	pedestrian
784	2011-08-18 13:52:00	Győr-Moson-Sopron	47.689916 17.660166	94000	serious injury	normal	sunny	collision in crossing direction
785	2011-08-18 15:30:00	Győr-Moson-Sopron	47.781305 17.639611	14 10+100	light injury	normal	sunny	collision in same direction
786	2011-08-18 15:50:00	Győr-Moson-Sopron	47.691279 16.578639	94000	light injury	not a road	sunny	pedestrian
787	2011-08-18 18:20:00	Győr-Moson-Sopron	47.669444 17.642083	94000	light injury	normal	sunny	collision with turning
788	2011-08-19 20:20:00	Győr-Moson-Sopron	47.642944 17.66286	82 70+730	light injury	normal	sunny	collision with turning
789	2011-08-20 16:25:00	Heves	47.996304 20.46111	2505 10+390	serious injury	normal	sunny	track leaving, without solid object collision
790	2011-08-20 21:15:00	Győr-Moson-Sopron	47.564281 17.710454	82 60+911	serious injury	normal	sunny	collision with turning
791	2011-08-20 22:45:00	Heves	48.033193 20.103777	2304-12-31 16:16:00	serious injury	normal	sunny	collision with stopped vehicle
792	2011-08-20 23:08:00	Heves	47.753555 19.888416	3 77+000	light injury	normal	sunny	track leaving, without solid object collision
793	2011-08-21 14:16:00	Győr-Moson-Sopron	47.6685 17.669749	94000	light injury	normal	sunny	collision in crossing direction
794	2011-08-22 12:05:00	Győr-Moson-Sopron	47.681894 17.638086	94000	light injury	not a road	sunny	pedestrian
795	2011-08-22 13:10:00	Győr-Moson-Sopron	47.683539 17.634169	1 128+000	light injury	normal	sunny	collision in crossing direction
796	2011-08-22 16:30:00	Győr-Moson-Sopron	47.676683 16.594587	94000	light injury	not a road	sunny	collision in crossing direction
797	2011-08-22 17:00:00	Győr-Moson-Sopron	47.463111 16.683111	94000 0+000	light injury	normal	sunny	track leaving, without solid object collision
798	2011-08-22 17:54:00	Győr-Moson-Sopron	47.83786 17.294166	1 159+000	serious injury	normal	sunny	track leaving, without solid object collision
799	2011-08-22 18:00:00	Heves	47.883564 20.384178	94000	light injury	normal	sunny	collision in crossing direction
800	2011-08-22 18:00:00	Győr-Moson-Sopron	47.838055 17.293833	1 159+000	light injury	normal	sunny	collision in same direction
801	2011-08-23 06:10:00	Győr-Moson-Sopron	47.671444 17.655166	94000	light injury	normal	sunny	collision with turning
802	2011-08-23 08:45:00	Heves	47.777721 19.925778	94000	light injury	normal	sunny	collision in crossing direction
803	2011-08-23 09:20:00	Győr-Moson-Sopron	47.681423 16.749026	84 90+450	light injury	normal	overcast	collision in same direction
804	2011-08-23 17:50:00	Heves	47.903003 20.366618	25 14+924	serious injury	normal	sunny	pedestrian
805	2011-08-24 02:45:00	Győr-Moson-Sopron	47.592749 16.939777	85 50+000	light injury	normal	sunny	track leaving, with solid object collision
806	2011-08-24 06:50:00	Győr-Moson-Sopron	47.696889 17.691305	94000	serious injury	normal	sunny	collision with turning
807	2011-08-24 09:13:00	Győr-Moson-Sopron	47.685536 17.633814	94000	light injury	normal	sunny	collision with stopped vehicle
808	2011-08-24 09:34:00	Győr-Moson-Sopron	47.689805 17.639999	94000	light injury	normal	sunny	collision in crossing direction
809	2011-08-24 12:30:00	Heves	47.610298 20.077578	94000	light injury	normal	sunny	pedestrian
810	2011-08-24 12:50:00	Győr-Moson-Sopron	47.684722 17.626805	94000	light injury	not a road	sunny	slipping, carving, overturning on the road
811	2011-08-24 18:30:00	Győr-Moson-Sopron	47.612028 17.629527	94000	serious injury	normal	sunny	collosing opposite direction
812	2011-08-25 15:44:00	Heves	47.852137 20.409669	2501 5+364	serious injury	normal	sunny	track leaving, without solid object collision
813	2011-08-25 15:55:00	Győr-Moson-Sopron	47.444 16.917277	94000	light injury	normal	sunny	track leaving, with solid object collision
814	2011-08-25 19:00:00	Győr-Moson-Sopron	47.594363 16.734812	84 105+600	light injury	normal	sunny	track leaving, without solid object collision
815	2011-08-25 20:55:00	Heves	47.879415 20.412416	2503 2+163	light injury	normal	sunny	collision with turning
816	2011-08-26 11:10:00	Győr-Moson-Sopron	47.865305 17.274722	94000	light injury	wet	sunny	collision in crossing direction
817	2011-08-26 11:30:00	Heves	48.027332 20.287886	24126 0+100	fatal	normal	sunny	collosing opposite direction
818	2011-08-26 13:30:00	Győr-Moson-Sopron	47.621416 16.785694	94000	light injury	normal	sunny	collision with turning
819	2011-08-26 14:27:00	Győr-Moson-Sopron	47.565655 17.70817	82 61+160	light injury	normal	sunny	collision in same direction
820	2011-08-26 16:16:00	Győr-Moson-Sopron	47.60889 17.738403	82 67+200	light injury	normal	sunny	collision with turning
821	2011-08-26 20:40:00	Győr-Moson-Sopron	47.644139 17.615666	83 69+800	serious injury	normal	sunny	collision in crossing direction
822	2011-08-27 11:10:00	Győr-Moson-Sopron	47.482027 17.08111	8611 13+000	light injury	normal	sunny	track leaving, without solid object collision
823	2011-08-27 11:55:00	Győr-Moson-Sopron	47.558305 17.334333	8422 8+270	serious injury	normal	sunny	track leaving, without solid object collision
824	2011-08-27 18:20:00	Heves	47.762196 20.501917	M3 121+250	fatal	normal	sunny	collision in same direction
825	2011-08-27 22:50:00	Győr-Moson-Sopron	47.500861 17.55486	83 19+900	light injury	wet	rainy	track leaving, without solid object collision
826	2011-08-28 00:52:00	Győr-Moson-Sopron	47.626166 17.447187	8417-09-30 22:00:00	light injury	wet	stormy	track leaving, with solid object collision
827	2011-08-28 02:25:00	Heves	47.736721 19.980167	3204-04-30 21:10:00	light injury	normal	sunny	slipping, carving, overturning on the road
828	2011-08-28 05:42:00	Győr-Moson-Sopron	47.592666 16.848083	85311 0+350	light injury	normal	overcast	track leaving, without solid object collision
829	2011-08-28 10:25:00	Győr-Moson-Sopron	47.620333 17.601721	94000	light injury	normal	sunny	collision in crossing direction
830	2011-08-28 16:30:00	Győr-Moson-Sopron	47.649611 16.657889	8518 22+250	serious injury	normal	sunny	track leaving, without solid object collision
831	2011-08-29 05:10:00	Győr-Moson-Sopron	47.71961 17.497138	94000	light injury	normal	overcast	collision in crossing direction
832	2011-08-29 07:20:00	Heves	47.900776 20.383083	94000	light injury	normal	sunny	collision with turning
833	2011-08-29 09:50:00	Heves	48.055304 20.350972	94000	serious injury	normal	sunny	slipping, carving, overturning on the road
834	2011-08-29 10:30:00	Győr-Moson-Sopron	47.609833 17.248721	94000	light injury	normal	sunny	collision in crossing direction
835	2011-08-29 11:20:00	Győr-Moson-Sopron	47.663334 16.623056	84 0+117	light injury	normal	sunny	collision in same direction
836	2011-08-29 15:20:00	Győr-Moson-Sopron	47.684862 16.594139	94000	serious injury	normal	sunny	pedestrian
837	2011-08-29 16:07:00	Győr-Moson-Sopron	47.87444 17.085185	86 0+180	light injury	normal	sunny	track leaving, without solid object collision
838	2011-08-29 18:00:00	Győr-Moson-Sopron	47.942487 17.257928	150 7+935	light injury	normal	sunny	track leaving, without solid object collision
839	2011-08-29 22:30:00	Heves	48.040137 20.102833	2305-03-01 01:00:00	light injury	normal	sunny	collision with turning
840	2011-08-30 02:05:00	Heves	47.719868 19.839884	M3 68+800	light injury	normal	sunny	track leaving, with solid object collision
841	2011-08-30 08:35:00	Győr-Moson-Sopron	47.68025 17.633777	94000	serious injury	normal	sunny	pedestrian
842	2011-08-30 09:00:00	Heves	47.884066 19.977085	M3 83+100	light injury	normal	sunny	track leaving, without solid object collision
843	2011-08-30 09:05:00	Győr-Moson-Sopron	47.574722 17.580027	83 61+000	light injury	normal	sunny	collision in same direction
844	2011-08-30 14:05:00	Győr-Moson-Sopron	47.69378 16.561105	94000	serious injury	normal	sunny	collision with turning
845	2011-08-31 11:40:00	Győr-Moson-Sopron	47.689527 17.639333	94000	serious injury	normal	sunny	collision with stopped vehicle
846	2011-08-31 15:38:00	Győr-Moson-Sopron	47.591298 17.597201	83 56+850	light injury	normal	sunny	track leaving, with solid object collision
847	2011-08-31 19:30:00	Heves	47.772942 19.92251	3 80+865	light injury	normal	sunny	collision in crossing direction
848	2011-08-31 20:20:00	Győr-Moson-Sopron	47.719913 16.647752	8527-03-31 17:00:00	light injury	normal	sunny	track leaving, without solid object collision
849	2011-09-01 16:50:00	Győr-Moson-Sopron	47.688251 16.587362	94000	light injury	wet	rainy	pedestrian
850	2011-09-01 16:53:00	Győr-Moson-Sopron	47.674731 16.58087	94000	light injury	wet	rainy	not driver accident
851	2011-09-02	Heves	47.706684 20.129189	M3 91+650	serious injury	normal	overcast	track leaving, without solid object collision
852	2011-09-02 04:20:00	Győr-Moson-Sopron	47.9054 17.181433	1 171+047	fatal	normal	sunny	collision in crossing direction
853	2011-09-02 06:15:00	Győr-Moson-Sopron	47.69825 17.665888	94000	serious injury	normal	sunny	collision in same direction
854	2011-09-02 16:20:00	Győr-Moson-Sopron	47.87836 17.2705	150 0+528	light injury	normal	sunny	collision in crossing direction
855	2011-09-02 19:05:00	Győr-Moson-Sopron	47.630738 17.359793	85 14+216	light injury	normal	sunny	collision in crossing direction
856	2011-09-02 21:02:00	Győr-Moson-Sopron	47.673083 17.676638	94000	light injury	normal	sunny	collision in crossing direction
857	2011-09-03 10:35:00	Heves	47.922304 20.170777	24 40+050	light injury	normal	sunny	track leaving, without solid object collision
858	2011-09-03 12:36:00	Győr-Moson-Sopron	47.855749 17.277194	1 161+375	light injury	normal	sunny	collision in same direction
859	2011-09-03 16:00:00	Heves	47.881249 20.194722	2415-02-28 18:00:00	light injury	normal	sunny	track leaving, without solid object collision
860	2011-09-03 17:50:00	Győr-Moson-Sopron	47.675472 17.630055	821 1+800	light injury	normal	sunny	track leaving, without solid object collision
861	2011-09-03 20:00:00	Győr-Moson-Sopron	47.682223 16.580223	86107 3+183	light injury	normal	sunny	pedestrian
862	2011-09-04 00:25:00	Győr-Moson-Sopron	47.682577 16.586434	8527-02-01 01:00:00	light injury	normal	sunny	track leaving, without solid object collision
863	2011-09-04 04:00:00	Heves	47.785632 19.913875	94000	light injury	normal	sunny	slipping, carving, overturning on the road
864	2011-09-04 09:00:00	Győr-Moson-Sopron	47.677083 17.613721	94000	serious injury	normal	sunny	collision in same direction
865	2011-09-04 10:05:00	Heves	47.74161 19.922111	32101 0+666	light injury	normal	sunny	collision in crossing direction
866	2011-09-04 14:35:00	Heves	47.891526 19.963583	2408 34+900	light injury	normal	sunny	collosing opposite direction
867	2011-09-04 17:18:00	Győr-Moson-Sopron	47.787833 17.139277	8507 0+400	serious injury	normal	sunny	collision in crossing direction
868	2011-09-04 19:35:00	Győr-Moson-Sopron	47.512751 17.767166	8226-07-01 02:00:00	serious injury	normal	sunny	track leaving, without solid object collision
869	2011-09-05 08:05:00	Győr-Moson-Sopron	47.614361 17.637333	8311 6+274	light injury	normal	sunny	pedestrian
870	2011-09-05 19:30:00	Győr-Moson-Sopron	47.60075 16.748	85 65+250	light injury	wet	rainy	collosing opposite direction
871	2011-09-06 05:25:00	Heves	47.76895 19.930384	94000	light injury	normal	overcast	collision with animals
872	2011-09-06 12:47:00	Győr-Moson-Sopron	47.711361 17.743666	19 4+600	fatal	normal	sunny	collosing opposite direction
873	2011-09-06 17:10:00	Heves	47.835371 20.335477	24129 5+200	light injury	normal	sunny	slipping, carving, overturning on the road
874	2011-09-06 22:42:00	Győr-Moson-Sopron	47.970972 17.177584	M15 7+400	light injury	normal	sunny	track leaving, without solid object collision
875	2011-09-07 07:20:00	Győr-Moson-Sopron	47.688529 16.583167	94000	light injury	normal	sunny	pedestrian
876	2011-09-07 16:20:00	Győr-Moson-Sopron	47.618051 17.064823	8516 0+184	light injury	normal	sunny	collision of train and vehicle
877	2011-09-08 16:40:00	Győr-Moson-Sopron	47.873888 17.262055	94000	serious injury	normal	overcast	collision in crossing direction
878	2011-09-08 18:20:00	Heves	47.892221 20.396277	94000	serious injury	normal	overcast	slipping, carving, overturning on the road
879	2011-09-08 20:45:00	Heves	47.890165 20.3725	94000	serious injury	normal	overcast	slipping, carving, overturning on the road
880	2011-09-09 11:00:00	Győr-Moson-Sopron	47.69439 16.584556	94000	serious injury	wet	rainy	collision in crossing direction
881	2011-09-09 18:30:00	Heves	47.884066 19.977085	24 14+000	serious injury	normal	sunny	track leaving, with solid object collision
882	2011-09-09 20:00:00	Heves	47.662374 19.647546	3 55+606	serious injury	normal	sunny	collision with turning
883	2011-09-09 23:00:00	Győr-Moson-Sopron	47.869416 17.268694	86 187+284	light injury	normal	overcast	pedestrian
884	2011-09-10 11:10:00	Heves	47.728556 20.024695	94000	light injury	normal	sunny	collision with turning
885	2011-09-10 12:20:00	Győr-Moson-Sopron	47.797082 17.391305	1 149+970	serious injury	normal	sunny	track leaving, without solid object collision
886	2011-09-10 12:30:00	Győr-Moson-Sopron	47.586083 17.027777	94000	light injury	normal	sunny	collision with turning
887	2011-09-10 14:37:00	Győr-Moson-Sopron	47.668028 17.652499	94000	light injury	normal	sunny	collision with turning
888	2011-09-10 15:15:00	Győr-Moson-Sopron	47.697946 16.578028	94000	light injury	not a road	sunny	collision in crossing direction
889	2011-09-10 17:25:00	Heves	47.886543 19.974981	24 18+028	fatal	normal	sunny	track leaving, without solid object collision
890	2011-09-11 09:30:00	Győr-Moson-Sopron	47.5695 16.726916	84 104+120	serious injury	normal	sunny	collision in same direction
891	2011-09-11 10:00:00	Győr-Moson-Sopron	47.6845 17.861166	M1 102+250	light injury	normal	sunny	track leaving, with solid object collision
892	2011-09-11 11:30:00	Heves	47.818471 20.358389	25 3+600	light injury	normal	sunny	track leaving, without solid object collision
893	2011-09-11 18:20:00	Heves	47.928776 20.477722	2509 15+100	light injury	normal	sunny	track leaving, without solid object collision
894	2011-09-11 18:25:00	Győr-Moson-Sopron	47.820153 17.059732	8507 0+002	light injury	normal	sunny	collision with turning
895	2011-09-12 05:10:00	Heves	47.718948 20.414478	31 128+745	light injury	normal	sunny	track leaving, without solid object collision
896	2011-09-12 08:37:00	Győr-Moson-Sopron	47.620222 16.676972	84 0+110	fatal	normal	sunny	collosing opposite direction
897	2011-09-12 12:45:00	Győr-Moson-Sopron	47.690805 17.639138	94000	light injury	normal	sunny	collision with turning
898	2011-09-12 13:35:00	Győr-Moson-Sopron	47.607472 17.244721	86 149+500	light injury	normal	sunny	pedestrian
899	2011-09-13 07:15:00	Heves	47.778999 19.917472	94000	light injury	normal	sunny	pedestrian
900	2011-09-13 07:20:00	Heves	47.778971 19.917444	94000	light injury	normal	sunny	collision in crossing direction
901	2011-09-13 07:40:00	Heves	47.63224 20.326786	31 116+845	light injury	normal	sunny	collision with turning
902	2011-09-13 14:00:00	Heves	47.718999 19.891972	3203-04-30 18:33:00	serious injury	normal	sunny	collosing opposite direction
903	2011-09-13 14:15:00	Győr-Moson-Sopron	47.687029 16.579362	94000	light injury	normal	sunny	collision in same direction
904	2011-09-13 14:30:00	Heves	48.025387 20.475833	2505 14+151	light injury	normal	sunny	track leaving, without solid object collision
905	2011-09-13 21:10:00	Heves	47.753089 20.243695	94000	light injury	normal	sunny	collision with turning
906	2011-09-14 05:30:00	Győr-Moson-Sopron	47.662972 17.689138	81 78+900	serious injury	normal	sunny	collision in same direction
907	2011-09-14 07:20:00	Heves	47.892915 20.371472	25 13+740	serious injury	normal	sunny	pedestrian
908	2011-09-14 13:10:00	Győr-Moson-Sopron	47.679777 17.64511	94000	light injury	normal	sunny	collision in crossing direction
909	2011-09-14 15:00:00	Heves	47.78326 19.925423	94000	light injury	normal	sunny	collision in crossing direction
910	2011-09-14 16:45:00	Győr-Moson-Sopron	47.880027 17.277639	1401 38+370	light injury	wet	rainy	track leaving, without solid object collision
911	2011-09-14 18:05:00	Győr-Moson-Sopron	47.653583 16.867017	8521-05-31 16:10:00	serious injury	wet	rainy	track leaving, with solid object collision
912	2011-09-14 18:10:00	Heves	48.029998 20.478694	2505 14+900	serious injury	normal	sunny	track leaving, without solid object collision
913	2011-09-15 08:35:00	Győr-Moson-Sopron	47.671213 17.645178	94000	light injury	normal	sunny	slipping, carving, overturning on the road
914	2011-09-15 09:35:00	Győr-Moson-Sopron	47.646231 17.422006	94000	serious injury	normal	sunny	collision with turning
915	2011-09-15 09:57:00	Győr-Moson-Sopron	47.86459 17.273175	1 162+510	light injury	normal	sunny	collision with turning
916	2011-09-15 14:45:00	Győr-Moson-Sopron	47.869749 17.273083	94000	light injury	not a road	sunny	collision in crossing direction
917	2011-09-15 14:53:00	Heves	47.872426 20.382929	25 11+010	serious injury	normal	sunny	pedestrian
918	2011-09-15 15:45:00	Heves	47.899387 20.375527	94000	serious injury	normal	sunny	pedestrian
919	2011-09-15 19:40:00	Heves	47.777488 19.929742	24138 2+000	light injury	normal	sunny	collision with turning
920	2011-09-15 21:10:00	Győr-Moson-Sopron	47.663916 17.635388	94000	serious injury	normal	sunny	collision in crossing direction
921	2011-09-17 12:46:00	Heves	47.918998 20.3345	24 58+000	light injury	normal	sunny	collosing opposite direction
922	2011-09-17 17:30:00	Győr-Moson-Sopron	47.589388 17.002305	85 45+650	serious injury	normal	sunny	collision with turning
923	2011-09-17 17:50:00	Heves	47.97472 20.418583	2505-04-30 17:22:00	light injury	normal	sunny	collision in same direction
924	2011-09-18 11:05:00	Heves	47.901404 20.379473	94000	serious injury	normal	sunny	collision with animals
925	2011-09-18 11:50:00	Heves	47.830888 19.970111	24 7+221	light injury	normal	sunny	collision in same direction
926	2011-09-18 13:10:00	Győr-Moson-Sopron	47.608111 16.714028	85 68+500	light injury	normal	sunny	collision with turning
927	2011-09-18 13:10:00	Győr-Moson-Sopron	47.605055 17.029027	94000	light injury	normal	sunny	collision in crossing direction
928	2011-09-18 19:05:00	Győr-Moson-Sopron	47.690973 16.574528	94000	light injury	normal	overcast	collision with turning
929	2011-09-18 19:20:00	Heves	47.73361 20.033278	94000	serious injury	normal	sunny	slipping, carving, overturning on the road
930	2011-09-18 21:20:00	Győr-Moson-Sopron	47.674194 17.64836	94000	light injury	normal	overcast	slipping, carving, overturning on the road
931	2011-09-19 03:25:00	Heves	47.6651 19.614044	M3 50+200	light injury	normal	overcast	collision with solid obstacle
932	2011-09-19 08:48:00	Győr-Moson-Sopron	47.739021 17.388629	M1 145+525	serious injury	wet	rainy	collision in same direction
933	2011-09-19 14:24:00	Győr-Moson-Sopron	47.667666 17.656194	94000	light injury	normal	sunny	track leaving, with solid object collision
934	2011-09-19 20:05:00	Győr-Moson-Sopron	47.680529 16.583584	86107 2+700	light injury	wet	rainy	pedestrian
935	2011-09-19 21:50:00	Győr-Moson-Sopron	47.879582 17.261389	94000	light injury	wet	rainy	collision in crossing direction
936	2011-09-20 07:45:00	Heves	47.768827 19.934445	94000	serious injury	not a road	overcast	pedestrian
937	2011-09-20 18:45:00	Heves	48.022637 20.329944	2506-02-28 17:50:00	light injury	normal	sunny	track leaving, without solid object collision
938	2011-09-21 00:40:00	Győr-Moson-Sopron	47.684333 17.838333	M1 0+104	light injury	normal	sunny	collision in same direction
939	2011-09-21 06:50:00	Heves	47.911031 20.376493	2504 0+462	light injury	normal	sunny	collision with turning
940	2011-09-21 11:45:00	Heves	47.780369 19.936592	94000	serious injury	normal	sunny	collision in crossing direction
941	2011-09-21 14:30:00	Győr-Moson-Sopron	47.662033 17.637138	94000	serious injury	not a road	sunny	pedestrian
942	2011-09-21 17:30:00	Győr-Moson-Sopron	47.699916 17.664388	94000	light injury	normal	sunny	collision in crossing direction
943	2011-09-21 18:05:00	Győr-Moson-Sopron	47.741196 16.545612	84 128+000	serious injury	normal	overcast	collision in same direction
944	2011-09-22 08:10:00	Győr-Moson-Sopron	47.644028 17.615333	83 69+800	light injury	normal	sunny	collision in crossing direction
945	2011-09-22 11:45:00	Győr-Moson-Sopron	47.672833 17.629416	94000	light injury	normal	sunny	collision in crossing direction
946	2011-09-22 11:55:00	Győr-Moson-Sopron	47.914472 17.154417	94000	serious injury	normal	sunny	collision in crossing direction
947	2011-09-22 13:20:00	Győr-Moson-Sopron	47.679777 17.63836	94000	serious injury	normal	sunny	collision in crossing direction
948	2011-09-22 15:53:00	Győr-Moson-Sopron	47.69464 16.582639	94000	serious injury	normal	sunny	collision in crossing direction
949	2011-09-22 17:20:00	Győr-Moson-Sopron	47.639361 17.473555	94000	serious injury	normal	sunny	collision in same direction
950	2011-09-23 07:15:00	Győr-Moson-Sopron	47.620778 17.60536	94000	light injury	normal	sunny	collision in crossing direction
951	2011-09-23 17:55:00	Heves	47.898657 20.38235	94000	light injury	normal	overcast	pedestrian
952	2011-09-23 18:00:00	Győr-Moson-Sopron	47.688418 16.587417	94000	serious injury	normal	sunny	pedestrian
953	2011-09-23 18:15:00	Győr-Moson-Sopron	47.682779 16.587917	94000	serious injury	normal	overcast	collision with turning
954	2011-09-23 20:42:00	Győr-Moson-Sopron	47.668222 17.643555	94000	light injury	normal	sunny	collision in crossing direction
955	2011-09-24 00:25:00	Heves	47.607919 20.439628	3212-09-30 23:02:00	serious injury	normal	sunny	track leaving, without solid object collision
956	2011-09-24 01:28:00	Győr-Moson-Sopron	47.885292 17.310123	1401 35+900	serious injury	normal	sunny	collosing opposite direction
957	2011-09-24 15:40:00	Heves	47.993961 20.012842	2411-09-30 18:00:00	light injury	normal	sunny	collosing opposite direction
958	2011-09-24 16:30:00	Győr-Moson-Sopron	47.680111 17.692777	94000	serious injury	normal	sunny	slipping, carving, overturning on the road
959	2011-09-24 22:00:00	Győr-Moson-Sopron	47.50172 16.782473	94000	fatal	normal	sunny	collision in crossing direction
960	2011-09-25 15:47:00	Győr-Moson-Sopron	47.667916 17.643221	94000	serious injury	normal	sunny	collosing opposite direction
961	2011-09-25 16:45:00	Győr-Moson-Sopron	47.475777 16.734083	8627 0+000	light injury	normal	sunny	track leaving, without solid object collision
962	2011-09-25 20:55:00	Győr-Moson-Sopron	47.687274 17.649159	83 53+600	light injury	normal	overcast	collosing opposite direction
963	2011-09-26 12:45:00	Győr-Moson-Sopron	47.672944 17.629166	94000	serious injury	normal	sunny	collosing opposite direction
964	2011-09-27 07:40:00	Győr-Moson-Sopron	47.443279 17.801805	8302 30+489	serious injury	normal	sunny	track leaving, with solid object collision
965	2011-09-27 10:30:00	Győr-Moson-Sopron	47.870249 17.270666	94000	serious injury	normal	sunny	collision with turning
966	2011-09-27 14:05:00	Heves	47.903387 20.377277	94000	light injury	normal	sunny	pedestrian
967	2011-09-27 14:05:00	Heves	47.771027 19.918083	94000	light injury	normal	sunny	collision with turning
968	2011-09-27 17:40:00	Heves	47.677461 19.691916	94000	serious injury	normal	sunny	collision with turning
969	2011-09-28 12:45:00	Heves	47.712799 20.293751	3208-05-31 18:00:00	serious injury	normal	sunny	track leaving, without solid object collision
970	2011-09-29 13:20:00	Győr-Moson-Sopron	47.853949 17.284569	94000	light injury	normal	sunny	collision in same direction
971	2011-09-29 15:15:00	Győr-Moson-Sopron	47.585718 16.769947	8612 30+499	serious injury	normal	sunny	collision in crossing direction
972	2011-09-30 07:00:00	Győr-Moson-Sopron	47.700533 16.605753	94000	light injury	normal	sunny	collision in crossing direction
973	2011-09-30 10:09:00	Győr-Moson-Sopron	47.692779 16.576501	94000	serious injury	normal	sunny	pedestrian
974	2011-09-30 15:25:00	Győr-Moson-Sopron	47.961388 17.317778	1407 12+345	light injury	normal	sunny	pedestrian
975	2011-10-01 09:47:00	Heves	47.664505 20.355431	31 121+140	serious injury	normal	sunny	collision in same direction
976	2011-10-01 11:05:00	Győr-Moson-Sopron	47.68258 16.569961	94000	serious injury	not a road	sunny	pedestrian
977	2011-10-01 15:55:00	Heves	47.819971 19.962722	24 5+800	light injury	normal	sunny	slipping, carving, overturning on the road
978	2011-10-01 16:00:00	Győr-Moson-Sopron	47.620305 16.879972	8518-04-01 00:20:00	serious injury	normal	sunny	collosing opposite direction
979	2011-10-01 20:15:00	Heves	47.747131 20.519527	33102 4+903	serious injury	normal	sunny	track leaving, with solid object collision
980	2011-10-02 08:25:00	Győr-Moson-Sopron	47.660333 17.658194	94000	serious injury	normal	sunny	track leaving, with solid object collision
981	2011-10-02 15:15:00	Győr-Moson-Sopron	47.668166 17.662666	94000	light injury	normal	sunny	collision in crossing direction
982	2011-10-02 15:15:00	Heves	47.869105 20.199618	2415 0+550	light injury	normal	sunny	track leaving, without solid object collision
983	2011-10-03 07:45:00	Heves	47.706604 20.119207	M3 90+900	light injury	normal	sunny	collision with turning
984	2011-10-03 09:30:00	Győr-Moson-Sopron	47.681207 16.583659	8518 24+150	serious injury	normal	sunny	collosing opposite direction
985	2011-10-03 10:50:00	Győr-Moson-Sopron	47.610341 17.246258	86 153+800	light injury	normal	sunny	collision with turning
986	2011-10-03 13:07:00	Heves	47.891575 20.386004	94000	light injury	normal	sunny	collision in crossing direction
987	2011-10-03 16:30:00	Győr-Moson-Sopron	47.691825 16.589666	84 124+350	serious injury	normal	sunny	collosing opposite direction
988	2011-10-03 19:15:00	Győr-Moson-Sopron	47.566556 17.58811	94000	fatal	normal	sunny	collision in same direction
989	2011-10-04 02:55:00	Győr-Moson-Sopron	47.685307 16.582	94000	light injury	normal	sunny	track leaving, without solid object collision
990	2011-10-04 07:32:00	Heves	47.923812 20.369008	25 17+507	serious injury	normal	sunny	pedestrian
991	2011-10-04 12:48:00	Győr-Moson-Sopron	47.621278 17.59061	83 66+460	light injury	normal	sunny	collision in crossing direction
992	2011-10-04 13:45:00	Győr-Moson-Sopron	47.437222 17.069166	86 120+700	serious injury	normal	sunny	collision in same direction
993	2011-10-04 14:15:00	Győr-Moson-Sopron	47.583222 17.686184	82 67+000	light injury	oily	sunny	collision in same direction
994	2011-10-04 18:30:00	Győr-Moson-Sopron	47.675401 16.597595	86107 2+314	light injury	normal	sunny	collision with turning
995	2011-10-04 22:14:00	Heves	47.616976 20.371601	32113 4+200	light injury	normal	sunny	collision in same direction
996	2011-10-05 08:20:00	Győr-Moson-Sopron	47.615305 17.254666	94000	light injury	normal	sunny	collision with turning
997	2011-10-05 11:00:00	Győr-Moson-Sopron	47.4845 17.081499	8611 13+290	light injury	normal	sunny	collision in same direction
998	2011-10-05 12:15:00	Heves	47.596139 20.288	3204 36+013	light injury	normal	sunny	collision in same direction
999	2011-10-06 08:03:00	Győr-Moson-Sopron	47.667083 17.637999	94000	light injury	normal	overcast	collision in crossing direction
1000	2011-10-06 09:40:00	Győr-Moson-Sopron	47.682577 16.586434	84 127+350	light injury	normal	sunny	track leaving, with solid object collision
1001	2011-10-06 09:50:00	Heves	47.900077 20.384206	94000	light injury	normal	sunny	collision with stopped vehicle
1002	2011-10-06 14:20:00	Heves	47.909754 20.370667	25 16+110	light injury	normal	sunny	collision in same direction
1003	2011-10-06 16:00:00	Győr-Moson-Sopron	47.608472 16.707917	85 68+688	serious injury	normal	sunny	collision in crossing direction
1004	2011-10-06 18:00:00	Győr-Moson-Sopron	47.655194 17.537999	84125 0+530	light injury	normal	sunny	collision with stopped vehicle
1005	2011-10-07 07:29:00	Győr-Moson-Sopron	47.592388 17.036083	85 43+153	light injury	wet	overcast	pedestrian
1006	2011-10-07 16:35:00	Győr-Moson-Sopron	47.62547 16.740822	8518 15+700	serious injury	wet	rainy	track leaving, with solid object collision
1007	2011-10-07 17:30:00	Győr-Moson-Sopron	47.664889 17.663138	94000	light injury	wet	rainy	collosing opposite direction
1008	2011-10-07 17:30:00	Győr-Moson-Sopron	47.626377 16.742517	8518 16+100	light injury	wet	overcast	collision in same direction
1009	2011-10-08 10:30:00	Heves	47.77011 19.934939	94000	light injury	normal	sunny	collision in crossing direction
1010	2011-10-08 14:20:00	Győr-Moson-Sopron	47.684723 16.59275	94000	light injury	wet	rainy	collision in same direction
1011	2011-10-08 16:29:00	Győr-Moson-Sopron	47.696584 16.581139	94000	light injury	wet	overcast	slipping, carving, overturning on the road
1012	2011-10-08 17:15:00	Heves	47.759416 20.409694	94000	light injury	normal	overcast	collision in crossing direction
1013	2011-10-08 23:40:00	Győr-Moson-Sopron	47.878907 17.263078	94000	light injury	normal	sunny	track leaving, without solid object collision
1014	2011-10-09 00:10:00	Győr-Moson-Sopron	47.876138 17.262055	1 163+950	light injury	normal	sunny	pedestrian
1015	2011-10-09 10:15:00	Heves	47.854304 19.970972	24 12+889	light injury	not a road	overcast	track leaving, with solid object collision
1016	2011-10-09 11:55:00	Győr-Moson-Sopron	47.754221 17.448194	1 143+400	light injury	normal	sunny	collision in same direction
1017	2011-10-09 13:40:00	Győr-Moson-Sopron	47.614306 17.89211		serious injury	normal	overcast	track leaving, without solid object collision
1018	2011-10-09 18:10:00	Győr-Moson-Sopron	47.687274 17.649159	83 50+900	serious injury	normal	sunny	collosing opposite direction
1019	2011-10-10 12:15:00	Győr-Moson-Sopron	47.664321 17.634306	94000	serious injury	normal	sunny	pedestrian
1020	2011-10-10 14:15:00	Győr-Moson-Sopron	47.856444 17.268278	94000	light injury	normal	sunny	collision in crossing direction
1021	2011-10-10 18:35:00	Győr-Moson-Sopron	47.691407 16.582312	94000	light injury	wet	rainy	pedestrian
1022	2011-10-11 06:30:00	Győr-Moson-Sopron	47.675139 17.583444	84125 0+400	serious injury	wet	overcast	collosing opposite direction
1023	2011-10-11 17:20:00	Győr-Moson-Sopron	47.74714 16.621362	94000 0+000	fatal	normal	sunny	collision with animals
1024	2011-10-12 03:55:00	Győr-Moson-Sopron	47.921777 17.175806	M15 4+234	serious injury	wet	rainy	collision in same direction
1025	2011-10-12 05:38:00	Győr-Moson-Sopron	47.677055 17.651472	94000	fatal	wet	overcast	pedestrian
1026	2011-10-12 08:05:00	Heves	47.777684 19.922569	94000 0+000	light injury	normal	sunny	collision with turning
1027	2011-10-12 21:30:00	Győr-Moson-Sopron	47.682436 16.569618	94000	serious injury	wet	rainy	collision with turning
1028	2011-10-13 03:25:00	Heves	47.972415 20.038722	2411-06-30 21:00:00	light injury	normal	overcast	track leaving, without solid object collision
1029	2011-10-13 06:40:00	Győr-Moson-Sopron	47.590395 17.055605	85 41+000	light injury	wet	overcast	collision in same direction
1030	2011-10-13 09:40:00	Győr-Moson-Sopron	47.682577 16.586434	86107 5+200	light injury	wet	overcast	track leaving, without solid object collision
1031	2011-10-13 12:20:00	Heves	47.986733 20.335651	25 25+900	light injury	normal	sunny	collision in same direction
1032	2011-10-13 14:00:00	Heves	47.899248 20.384277	94000	light injury	normal	sunny	collision in crossing direction
1033	2011-10-13 22:40:00	Győr-Moson-Sopron	47.545904 16.742806	84 102+500	light injury	normal	sunny	track leaving, without solid object collision
1034	2011-10-14 04:40:00	Győr-Moson-Sopron	47.652639 17.833972	8136 39+000	light injury	normal	sunny	collision with animals
1035	2011-10-14 07:50:00	Heves	47.894316 20.383852	94000	serious injury	normal	sunny	collision with turning
1036	2011-10-14 10:20:00	Heves	47.687843 19.695801	M3 56+970	serious injury	normal	overcast	collision with solid obstacle
1037	2011-10-14 14:18:00	Győr-Moson-Sopron	47.698945 16.605723	8527-01-01 01:00:00	light injury	normal	sunny	collision with turning
1038	2011-10-14 15:20:00	Győr-Moson-Sopron	47.830999 17.212361	86 0+181	serious injury	normal	overcast	collosing opposite direction
1039	2011-10-14 19:10:00	Heves	47.98622 20.335944	25 25+250	light injury	normal	sunny	track leaving, without solid object collision
1040	2011-10-15 00:08:00	Győr-Moson-Sopron	47.681527 17.638388	94000	light injury	normal	sunny	pedestrian
1041	2011-10-15 10:45:00	Győr-Moson-Sopron	47.569083 16.865972	8627-03-01 01:00:00	serious injury	normal	sunny	collision with turning
1042	2011-10-15 15:32:00	Győr-Moson-Sopron	47.58725 17.763666	8222 0+011	serious injury	normal	sunny	track leaving, with solid object collision
1043	2011-10-15 20:00:00	Győr-Moson-Sopron	47.709777 17.649499	1301 1+733	light injury	normal	sunny	track leaving, without solid object collision
1044	2011-10-16 14:00:00	Győr-Moson-Sopron	47.66858 16.58859	94000	light injury	normal	sunny	collision with turning
1045	2011-10-16 14:20:00	Győr-Moson-Sopron	47.51489 17.825277	94000	light injury	normal	sunny	track leaving, without solid object collision
1046	2011-10-16 16:55:00	Győr-Moson-Sopron	47.854527 17.278639	1 161+200	light injury	normal	sunny	collision in same direction
1047	2011-10-16 22:50:00	Heves	47.667083 19.7155	94000	light injury	normal	sunny	collision with turning
1048	2011-10-17 16:30:00	Győr-Moson-Sopron	47.690944 17.640944	94000	light injury	normal	sunny	collision in crossing direction
1049	2011-10-17 17:50:00	Győr-Moson-Sopron	47.668694 17.643499	82 73+550	light injury	normal	sunny	pedestrian
1050	2011-10-17 20:35:00	Győr-Moson-Sopron	47.633857 16.600045	8645-07-31 19:20:00	light injury	normal	sunny	collision in crossing direction
1051	2011-10-18 09:30:00	Heves	47.770332 19.926361	94000	light injury	normal	sunny	collision in crossing direction
1052	2011-10-18 12:40:00	Győr-Moson-Sopron	47.672139 17.650999	94000	serious injury	normal	sunny	collision in same direction
1053	2011-10-18 13:45:00	Győr-Moson-Sopron	47.696 17.634999	94000	serious injury	normal	sunny	pedestrian
1054	2011-10-19 05:20:00	Győr-Moson-Sopron	47.708777 17.631277		light injury	normal	sunny	collision in crossing direction
1055	2011-10-20 10:00:00	Heves	47.88911 20.367305	2416 42+496	light injury	wet	rainy	collosing opposite direction
1056	2011-10-20 11:40:00	Győr-Moson-Sopron	47.913472 17.15725	94000	light injury	not a road	overcast	pedestrian
1057	2011-10-20 11:55:00	Győr-Moson-Sopron	47.683001 16.588056	94000	light injury	normal	overcast	collision in crossing direction
1058	2011-10-20 16:40:00	Heves	47.966943 20.264194	2413-04-30 23:20:00	light injury	wet	rainy	track leaving, without solid object collision
1059	2011-10-21 07:45:00	Heves	47.851929 20.365917	25 8+100	light injury	wet	overcast	track leaving, without solid object collision
1060	2011-10-21 18:30:00	Győr-Moson-Sopron	47.893888 17.181555	M15 0+650	light injury	normal	sunny	collision in crossing direction
1061	2011-10-21 18:45:00	Heves	47.648389 20.680195	33 28+900	serious injury	normal	sunny	pedestrian
1062	2011-10-21 20:34:00	Győr-Moson-Sopron	47.679416 17.645333	94000	light injury	normal	overcast	pedestrian
1063	2011-10-22 12:10:00	Heves	47.886082 20.375805	94000	light injury	normal	overcast	collision in crossing direction
1064	2011-10-22 21:53:00	Győr-Moson-Sopron	47.669222 17.567138	M1 127+050	light injury	normal	sunny	collision in same direction
1065	2011-10-23 03:05:00	Győr-Moson-Sopron	47.697389 17.63736	94000	serious injury	wet	rainy	track leaving, with solid object collision
1066	2011-10-23 12:30:00	Győr-Moson-Sopron	47.686408 16.587362	94000	light injury	normal	overcast	pedestrian
1067	2011-10-24 11:00:00	Győr-Moson-Sopron	47.581056 17.696777	82 64+000	light injury	normal	sunny	track leaving, without solid object collision
1068	2011-10-24 11:45:00	Heves	47.895582 20.38725	94000	light injury	normal	overcast	collision in same direction
1069	2011-10-25 07:35:00	Heves	47.884552 20.381048	25 12+363	light injury	wet	overcast	collision in same direction
1070	2011-10-25 11:10:00	Győr-Moson-Sopron	47.877451 17.2694	150 0+550	serious injury	wet	rainy	collision in same direction
1071	2011-10-25 13:20:00	Heves	47.889637 20.394055	2503 0+212	serious injury	normal	overcast	collision in crossing direction
1072	2011-10-25 14:10:00	Győr-Moson-Sopron	47.667972 17.642388	94000	serious injury	wet	rainy	collision in crossing direction
1073	2011-10-25 14:25:00	Győr-Moson-Sopron	47.647555 17.464971	84128 0+070	light injury	wet	rainy	collision with turning
1074	2011-10-25 14:30:00	Heves	47.665278 19.661194	3 56+680	light injury	normal	sunny	pedestrian
1075	2011-10-25 17:25:00	Győr-Moson-Sopron	47.687274 17.649159	M1 114+209	light injury	wet	rainy	collision in same direction
1076	2011-10-26 05:34:00	Győr-Moson-Sopron	47.704611 17.528416	1 135+400	serious injury	normal	overcast	collosing opposite direction
1077	2011-10-27 08:58:00	Győr-Moson-Sopron	47.865194 17.258528	94000	light injury	normal	overcast	collision in crossing direction
1078	2011-10-27 15:45:00	Heves	47.886471 20.351861	2416 41+400	serious injury	normal	sunny	collosing opposite direction
1079	2011-10-28 05:55:00	Győr-Moson-Sopron	47.633667 17.610721	94000	serious injury	normal	overcast	collision with turning
1080	2011-10-28 06:05:00	Győr-Moson-Sopron	47.868444 17.269639	M1 152+968	light injury	normal	overcast	collision in same direction
1081	2011-10-28 06:40:00	Győr-Moson-Sopron	47.872237 17.269277	86 186+050	light injury	normal	overcast	collision in crossing direction
1082	2011-10-28 08:50:00	Győr-Moson-Sopron	47.681465 16.593201	94000	serious injury	normal	overcast	pedestrian
1083	2011-10-28 09:30:00	Győr-Moson-Sopron	47.685482 16.577203	94000	light injury	normal	overcast	collision in crossing direction
1084	2011-10-29 12:06:00	Heves	47.757618 19.868011	24139 1+497	light injury	normal	sunny	collision with turning
1085	2011-10-29 14:05:00	Győr-Moson-Sopron	47.512472 17.515721	94000	serious injury	normal	sunny	collision in same direction
1086	2011-10-29 19:20:00	Győr-Moson-Sopron	47.597194 16.828472	85 59+750	light injury	normal	overcast	collision in same direction
1087	2011-10-30 03:00:00	Győr-Moson-Sopron	47.76386 17.389472	M1 144+550	light injury	normal	sunny	collision in same direction
1088	2011-10-30 10:50:00	Győr-Moson-Sopron	47.727583 17.488249	1 139+000	light injury	normal	sunny	track leaving, without solid object collision
1089	2011-10-31 20:10:00	Győr-Moson-Sopron	47.683527 17.634083	1 126+020	light injury	normal	overcast	collision in crossing direction
1090	2011-11-01 10:50:00	Heves	47.727238 19.895664	M3 73+100	serious injury	normal	sunny	collision in same direction
1091	2011-11-02 05:40:00	Győr-Moson-Sopron	47.713638 17.62236	1401 1+100	light injury	wet	foggy	track leaving, without solid object collision
1092	2011-11-02 07:30:00	Győr-Moson-Sopron	47.668555 17.637583	94000	light injury	normal	overcast	pedestrian
1093	2011-11-02 13:15:00	Heves	47.680361 19.754833	3 64+242	light injury	normal	sunny	collision in same direction
1094	2011-11-02 16:00:00	Győr-Moson-Sopron	47.682272 17.619159	94000	light injury	normal	sunny	collosing opposite direction
1095	2011-11-02 17:10:00	Győr-Moson-Sopron	47.678639 17.636749	94000	light injury	normal	overcast	pedestrian
1096	2011-11-03 17:25:00	Győr-Moson-Sopron	47.880805 17.279166	94000	light injury	normal	overcast	pedestrian
1097	2011-11-03 19:10:00	Heves	47.847237 19.956461	24 12+000	serious injury	normal	overcast	track leaving, without solid object collision
1098	2011-11-04 14:00:00	Heves	48.098276 20.389611	2506 14+180	light injury	normal	sunny	slipping, carving, overturning on the road
1099	2011-11-05 05:55:00	Heves	47.769249 19.916389	3 80+248	light injury	normal	sunny	collision with turning
1100	2011-11-05 16:45:00	Győr-Moson-Sopron	47.661029 16.483973		serious injury	normal	overcast	track leaving, without solid object collision
1101	2011-11-05 22:30:00	Győr-Moson-Sopron	47.681889 17.636722	94000	serious injury	not a road	sunny	pedestrian
1102	2011-11-06 03:30:00	Győr-Moson-Sopron	47.85411 17.256055	86 184+950	fatal	normal	sunny	track leaving, with solid object collision
1103	2011-11-06 18:00:00	Heves	47.914696 20.372345	94000	light injury	normal	sunny	pedestrian
1104	2011-11-07 11:30:00	Heves	47.495502 20.494744	3209 23+928	light injury	normal	sunny	collision in crossing direction
1105	2011-11-07 17:50:00	Győr-Moson-Sopron	47.868082 17.278444	94000	light injury	normal	overcast	collision in crossing direction
1106	2011-11-07 19:00:00	Heves	47.986748 20.335749	25 24+500	serious injury	normal	overcast	track leaving, without solid object collision
1107	2011-11-08 13:52:00	Győr-Moson-Sopron	47.683111 17.635333	94000	serious injury	not a road	sunny	pedestrian
1108	2011-11-08 20:40:00	Heves	47.729862 20.387489	M3 111+400	light injury	normal	sunny	collision with turning
1109	2011-11-09 06:10:00	Győr-Moson-Sopron	47.68762 16.586208	94000	light injury	wet	sunny	track leaving, with solid object collision
1110	2011-11-09 06:50:00	Heves	47.899342 20.375433	94000 0+000	serious injury	not a road	sunny	pedestrian
1111	2011-11-09 12:45:00	Győr-Moson-Sopron	47.478646 17.028515	8612-11-30 19:03:00	light injury	normal	sunny	collision in crossing direction
1112	2011-11-09 16:50:00	Győr-Moson-Sopron	47.707833 17.634138	14 2+356	light injury	normal	sunny	collision with turning
1113	2011-11-09 19:28:00	Győr-Moson-Sopron	47.68775 17.643694	94000	light injury	normal	foggy	collision in same direction
1114	2011-11-10 19:25:00	Győr-Moson-Sopron	47.683722 17.634833	1 126+086	serious injury	normal	foggy	pedestrian
1115	2011-11-11 07:40:00	Győr-Moson-Sopron	47.630986 17.355246	8502-02-28 16:00:00	light injury	normal	sunny	collision in crossing direction
1116	2011-11-11 08:15:00	Győr-Moson-Sopron	47.666583 17.63736	94000	serious injury	normal	overcast	pedestrian
1117	2011-11-11 17:15:00	Győr-Moson-Sopron	47.533167 17.530249	83 54+500	light injury	normal	sunny	collision in crossing direction
1118	2011-11-11 19:00:00	Győr-Moson-Sopron	47.68825 17.642972	94000	light injury	normal	sunny	pedestrian
1119	2011-11-12 04:20:00	Győr-Moson-Sopron	47.683277 17.626888	94000	light injury	not a road	sunny	pedestrian
1120	2011-11-12 09:38:00	Győr-Moson-Sopron	47.679083 17.645694	94000	serious injury	normal	sunny	collision in crossing direction
1121	2011-11-12 10:28:00	Győr-Moson-Sopron	47.725194 17.490722	1 139+000	light injury	normal	sunny	collision with stopped vehicle
1122	2011-11-12 11:45:00	Heves	47.7055 19.666694	21 4+500	fatal	normal	sunny	collosing opposite direction
1123	2011-11-12 13:38:00	Győr-Moson-Sopron	47.868431 17.269628	1 170+225	light injury	normal	sunny	collision with turning
1124	2011-11-13 13:25:00	Heves	47.735386 19.663656	21 7+850	light injury	normal	sunny	collision with turning
1125	2011-11-13 17:25:00	Heves	47.671527 19.728389	3 62+026	fatal	normal	sunny	pedestrian
1126	2011-11-14 07:40:00	Heves	47.671972 19.667805	2111 13+016	light injury	normal	sunny	collision with turning
1127	2011-11-14 18:20:00	Győr-Moson-Sopron	47.719361 17.656555	1301 2+200	light injury	normal	sunny	track leaving, with solid object collision
1128	2011-11-14 18:30:00	Győr-Moson-Sopron	47.618672 16.887195	94000	serious injury	normal	foggy	collision in crossing direction
1129	2011-11-15 05:55:00	Heves	47.688333 19.69325	M3 56+950	serious injury	normal	foggy	track leaving, with solid object collision
1130	2011-11-15 07:00:00	Győr-Moson-Sopron	47.685001 16.583389	94000	light injury	normal	sunny	collision in crossing direction
1131	2011-11-15 13:20:00	Győr-Moson-Sopron	47.687139 17.61861	94000	light injury	normal	sunny	collision in crossing direction
1132	2011-11-15 14:00:00	Győr-Moson-Sopron	47.677139 17.632416	94000	light injury	normal	sunny	collision with animals
1133	2011-11-16 08:30:00	Győr-Moson-Sopron	47.632078 17.484865	94000	light injury	normal	foggy	collision in crossing direction
1134	2011-11-16 14:50:00	Heves	47.929721 20.220694	24 44+800	light injury	wet	sunny	track leaving, with solid object collision
1135	2011-11-17 17:10:00	Győr-Moson-Sopron	47.621389 17.677555	82 0+100	serious injury	normal	foggy	collision in crossing direction
1136	2011-11-18 09:18:00	Győr-Moson-Sopron	47.50279 17.224347	86 135+800	serious injury	normal	foggy	collision in crossing direction
1137	2011-11-19 06:05:00	Heves	48.108526 20.370972	2508 17+740	serious injury	snowy	foggy	collosing opposite direction
1138	2011-11-19 15:20:00	Győr-Moson-Sopron	47.740997 16.54553	84 0+128	light injury	normal	sunny	track leaving, without solid object collision
1139	2011-11-19 17:10:00	Győr-Moson-Sopron	47.44843 17.79096	8302 29+000	light injury	normal	overcast	collosing opposite direction
1140	2011-11-20 04:50:00	Heves	47.828987 20.087353	2416 13+150	serious injury	wet	overcast	track leaving, without solid object collision
1141	2011-11-21 06:36:00	Győr-Moson-Sopron	47.688111 17.560555	1 132+400	light injury	snowy	overcast	track leaving, without solid object collision
1142	2011-11-22 06:35:00	Győr-Moson-Sopron	47.67273 17.650551	94000	light injury	normal	sunny	collision in crossing direction
1143	2011-11-22 09:45:00	Győr-Moson-Sopron	47.672199 16.583714	94000	light injury	wet	overcast	track leaving, without solid object collision
1144	2011-11-22 09:51:00	Győr-Moson-Sopron	47.874992 17.258209	94000	serious injury	normal	overcast	pedestrian
1145	2011-11-22 16:00:00	Győr-Moson-Sopron	47.758083 17.443027	1 143+300	fatal	normal	overcast	collosing opposite direction
1146	2011-11-22 16:40:00	Győr-Moson-Sopron	47.630722 16.658139	84 112+550	light injury	normal	overcast	collision with turning
1147	2011-11-22 17:00:00	Győr-Moson-Sopron	47.460536 17.098017	94000	serious injury	normal	overcast	track leaving, with solid object collision
1148	2011-11-22 21:10:00	Győr-Moson-Sopron	47.87736 17.258889	1 164+396	serious injury	wet	sunny	collision with turning
1149	2011-11-23 01:30:00	Győr-Moson-Sopron	47.791138 17.649416	14 11+600	light injury	snowy	overcast	track leaving, without solid object collision
1150	2011-11-23 05:38:00	Győr-Moson-Sopron	47.679111 17.62036	1 127+400	serious injury	snowy	overcast	collosing opposite direction
1151	2011-11-23 06:38:00	Győr-Moson-Sopron	47.6875 17.645194	1 125+230	light injury	snowy	overcast	collision in same direction
1152	2011-11-23 07:20:00	Győr-Moson-Sopron	47.683202 16.579621	94000	light injury	wet	overcast	slipping, carving, overturning on the road
1153	2011-11-23 07:30:00	Győr-Moson-Sopron	47.669528 16.610611	94000	serious injury	snowy	foggy	track leaving, without solid object collision
1154	2011-11-23 13:50:00	Heves	47.916199 20.345392	24 59+000	light injury	snowy	sunny	track leaving, without solid object collision
1155	2011-11-23 19:47:00	Heves	47.646555 19.6445	3104 28+065	light injury	normal	sunny	track leaving, without solid object collision
1156	2011-11-24 19:45:00	Heves	47.760221 19.703958	94000 0+000	serious injury	normal	overcast	pedestrian
1157	2011-11-25 07:20:00	Heves	47.619805 20.27325	3204 32+985	light injury	snowy	sunny	track leaving, without solid object collision
1158	2011-11-25 16:50:00	Győr-Moson-Sopron	47.682209 16.580161	86107 3+000	light injury	wet	overcast	pedestrian
1159	2011-11-26 06:30:00	Heves	47.746082 19.912275	3203-02-01 01:00:00	serious injury	snowy	overcast	collosing opposite direction
1160	2011-11-26 09:08:00	Győr-Moson-Sopron	47.683437 16.584995	94000	serious injury	normal	sunny	collision with stopped vehicle
1161	2011-11-26 12:35:00	Győr-Moson-Sopron	47.520449 17.093566	8608 0+500	light injury	normal	overcast	collision with turning
1162	2011-11-26 15:40:00	Győr-Moson-Sopron	47.607683 17.209096	94000	light injury	normal	overcast	slipping, carving, overturning on the road
1163	2011-11-26 19:10:00	Győr-Moson-Sopron	47.507 16.778666	84 95+950	serious injury	wet	overcast	collision with turning
1164	2011-11-27 17:30:00	Heves	47.666176 19.7032	3 59+986	light injury	wet	overcast	not driver accident
1165	2011-11-27 22:15:00	Győr-Moson-Sopron	47.587638 16.878194	8622 0+500	light injury	wet	overcast	slipping, carving, overturning on the road
1166	2011-11-28 04:45:00	Győr-Moson-Sopron	47.85186 17.272	85304 3+900	light injury	normal	sunny	collision in crossing direction
1167	2011-11-28 06:40:00	Győr-Moson-Sopron	47.677778 17.646666	94000	light injury	normal	sunny	pedestrian
1168	2011-11-28 10:00:00	Heves	47.768085 19.91268	94000 0+000	light injury	not a road	sunny	pedestrian
1169	2011-11-28 12:55:00	Heves	47.777902 20.028766	94000 0+950	light injury	oily	overcast	track leaving, without solid object collision
1170	2011-11-28 18:55:00	Heves	47.891054 20.378833	25 13+147	light injury	wet	overcast	collision with turning
1171	2011-11-29 06:24:00	Győr-Moson-Sopron	47.857471 17.316278	1406 5+083	serious injury	normal	foggy	collosing opposite direction
1172	2011-11-29 09:45:00	Győr-Moson-Sopron	47.683385 16.585517	94000	serious injury	wet	sunny	collision in crossing direction
1173	2011-11-29 12:30:00	Győr-Moson-Sopron	47.561764 17.05431	8611-03-31 23:00:00	light injury	wet	sunny	collision with turning
1174	2011-11-29 20:00:00	Győr-Moson-Sopron	47.667139 17.637888	94000	light injury	wet	sunny	collision in crossing direction
1175	2011-11-29 22:10:00	Heves	47.773846 19.924199	3 81+034	light injury	normal	sunny	slipping, carving, overturning on the road
1176	2011-11-30 07:40:00	Győr-Moson-Sopron	47.618267 17.237723	94000	serious injury	wet	overcast	collision in crossing direction
1177	2011-11-30 16:20:00	Győr-Moson-Sopron	47.482237 16.736591	8627 18+600	light injury	wet	overcast	track leaving, without solid object collision
1178	2011-11-30 23:00:00	Heves	47.826221 20.356528	25 4+519	light injury	wet	foggy	track leaving, without solid object collision
1179	2011-12-01 05:10:00	Győr-Moson-Sopron	47.607448 16.6958	84 107+000	light injury	wet	foggy	collosing opposite direction
1180	2011-12-01 05:10:00	Győr-Moson-Sopron	47.552088 17.563449	83 607+448	light injury	wet	foggy	collosing opposite direction
1181	2011-12-01 08:55:00	Győr-Moson-Sopron	47.765638 17.386249	M1 145+200	serious injury	wet	foggy	collision in same direction
1182	2011-12-01 18:15:00	Győr-Moson-Sopron	47.682223 16.580223	86107 3+300	light injury	wet	overcast	pedestrian
1183	2011-12-01 18:55:00	Heves	47.802976 19.761788	2402-10-01 00:40:00	light injury	snowy	overcast	collosing opposite direction
1184	2011-12-02 00:50:00	Heves	47.670166 19.683778	2401 0+357	light injury	wet	overcast	track leaving, with solid object collision
1185	2011-12-02 06:20:00	Heves	47.997054 20.154055	2412-09-01 01:48:00	light injury	wet	foggy	collision in crossing direction
1186	2011-12-02 11:50:00	Heves	47.603778 20.065861	3205-10-31 15:10:00	light injury	wet	foggy	track leaving, without solid object collision
1187	2011-12-02 17:06:00	Győr-Moson-Sopron	47.684083 17.642027	94000	light injury	wet	overcast	collision in crossing direction
1188	2011-12-02 17:45:00	Győr-Moson-Sopron	47.661472 17.689583	81 79+300	light injury	wet	overcast	slipping, carving, overturning on the road
1189	2011-12-03 00:39:00	Győr-Moson-Sopron	47.483213 16.735792	8627 20+500	light injury	wet	foggy	track leaving, without solid object collision
1190	2011-12-03 10:45:00	Heves	47.685531 19.664899	21 2+200	light injury	wet	overcast	collision with turning
1191	2011-12-03 17:43:00	Heves	47.685555 19.664889	21 2+200	light injury	wet	rainy	collision with turning
1192	2011-12-03 18:58:00	Heves	47.770499 19.918611	3 80+452	light injury	wet	overcast	pedestrian
1193	2011-12-04 14:00:00	Győr-Moson-Sopron	47.666861 17.63811	94000	light injury	wet	overcast	collision in same direction
1194	2011-12-04 15:12:00	Győr-Moson-Sopron	47.675444 17.642805	94000	light injury	wet	overcast	collision in same direction
1195	2011-12-04 15:50:00	Győr-Moson-Sopron	47.724139 17.856055	8151-12-31 22:45:00	serious injury	normal	overcast	track leaving, without solid object collision
1196	2011-12-04 18:00:00	Győr-Moson-Sopron	47.668028 17.642277	94000	light injury	wet	overcast	pedestrian
1197	2011-12-05 17:34:00	Heves	47.750638 20.417944	94000 0+000	serious injury	normal	overcast	pedestrian
1198	2011-12-06 10:05:00	Győr-Moson-Sopron	47.634417 17.669916	82 69+800	light injury	normal	sunny	collision in crossing direction
1199	2011-12-06 10:15:00	Győr-Moson-Sopron	47.489166 16.793083	84 93+150	light injury	normal	sunny	collision in same direction
1200	2011-12-06 13:05:00	Heves	48.103331 20.388388	2506 15+020	light injury	normal	sunny	pedestrian
1201	2011-12-06 13:18:00	Győr-Moson-Sopron	47.678222 17.662249	94000	light injury	normal	sunny	collosing opposite direction
1202	2011-12-06 17:05:00	Győr-Moson-Sopron	47.642889 17.662777		light injury	normal	sunny	collision in crossing direction
1203	2011-12-08 09:50:00	Heves	47.763666 19.909333	3 79+462	serious injury	normal	sunny	collision in same direction
1204	2011-12-08 16:50:00	Győr-Moson-Sopron	47.694305 16.845416	8521 15+000	serious injury	not a road	overcast	track leaving, without solid object collision
1205	2011-12-08 23:55:00	Heves	47.702666 20.301833	3208-08-01 00:50:00	serious injury	normal	sunny	collision with solid obstacle
1206	2011-12-09 08:25:00	Heves	47.754097 19.910852	3203-01-01	light injury	normal	overcast	track leaving, without solid object collision
1207	2011-12-09 16:07:00	Heves	47.809249 20.41425	2501 10+284	serious injury	normal	overcast	collosing opposite direction
1208	2011-12-09 16:50:00	Győr-Moson-Sopron	47.588694 17.081583	85 38+850	light injury	normal	sunny	track leaving, without solid object collision
1209	2011-12-09 18:00:00	Győr-Moson-Sopron	47.680945 16.586667	94000	light injury	normal	sunny	collision in crossing direction
1210	2011-12-09 18:40:00	Heves	47.921248 20.369416	25 17+219	serious injury	normal	overcast	collision with turning
1211	2011-12-10 10:45:00	Győr-Moson-Sopron	47.681722 17.641777	94000	light injury	normal	sunny	collision in crossing direction
1212	2011-12-10 17:25:00	Győr-Moson-Sopron	47.916993 17.155622	1501 0+000	serious injury	wet	rainy	collision in crossing direction
1213	2011-12-11 14:40:00	Heves	47.714616 20.000994	M3 79+450	light injury	normal	sunny	slipping, carving, overturning on the road
1214	2011-12-11 16:36:00	Győr-Moson-Sopron	47.735721 17.391305	8528-10-31 22:10:00	serious injury	normal	overcast	collision in same direction
1215	2011-12-11 20:50:00	Heves	47.851776 20.366166	25 8+077	light injury	wet	sunny	track leaving, without solid object collision
1216	2011-12-12 10:45:00	Győr-Moson-Sopron	47.6885 17.625083	94000	light injury	normal	sunny	collision with solid obstacle
1217	2011-12-12 15:24:00	Győr-Moson-Sopron	47.675583 17.642916	94000	serious injury	normal	sunny	collision in crossing direction
1218	2011-12-12 18:00:00	Győr-Moson-Sopron	47.689121 17.721009	94000	serious injury	normal	sunny	collosing opposite direction
1219	2011-12-12 18:00:00	Heves	47.77061 19.736805	2402-05-01 02:00:00	serious injury	wet	overcast	collosing opposite direction
1220	2011-12-13 16:14:00	Győr-Moson-Sopron	47.67025 17.522971	85 4+291	serious injury	normal	overcast	collosing opposite direction
1221	2011-12-13 16:44:00	Győr-Moson-Sopron	47.682577 16.586434	84 127+700	serious injury	normal	sunny	collision in same direction
1222	2011-12-14 13:25:00	Győr-Moson-Sopron	47.857944 17.265972	86 186+052	fatal	normal	overcast	pedestrian
1223	2011-12-14 16:00:00	Győr-Moson-Sopron	47.59396 16.734619	84 104+000	serious injury	wet	foggy	track leaving, with solid object collision
1224	2011-12-14 16:32:00	Győr-Moson-Sopron	47.675055 17.64586	94000	light injury	normal	sunny	collision with stopped vehicle
1225	2011-12-15 16:07:00	Heves	47.774082 19.921722	94000 0+000	light injury	wet	rainy	pedestrian
1226	2011-12-15 17:54:00	Győr-Moson-Sopron	47.680639 17.660999	94000	serious injury	wet	rainy	pedestrian
1227	2011-12-15 17:55:00	Heves	47.852749 20.366083	25 8+200	serious injury	wet	rainy	track leaving, without solid object collision
1228	2011-12-15 18:00:00	Heves	47.627333 20.323334	31 116+200	light injury	wet	overcast	track leaving, with solid object collision
1229	2011-12-15 20:30:00	Győr-Moson-Sopron	47.684896 16.579041	94000	serious injury	wet	overcast	pedestrian
1230	2011-12-16 05:15:00	Győr-Moson-Sopron	47.825916 17.323444	1 0+100	fatal	snowy	sunny	track leaving, with solid object collision
1231	2011-12-16 06:35:00	Győr-Moson-Sopron	47.685501 16.581945	94000	serious injury	wet	overcast	pedestrian
1232	2011-12-16 06:50:00	Győr-Moson-Sopron	47.716083 17.715388	M19 6+750	light injury	snowy	overcast	track leaving, without solid object collision
1233	2011-12-16 07:07:00	Győr-Moson-Sopron	47.511778 17.515221	83 51+800	light injury	snowy	sunny	collosing opposite direction
1234	2011-12-16 07:20:00	Győr-Moson-Sopron	47.778888 17.526388	94000 0+000	light injury	snowy	sunny	slipping, carving, overturning on the road
1235	2011-12-16 07:25:00	Győr-Moson-Sopron	47.731611 17.850305	1 0+108	light injury	snowy	sunny	track leaving, without solid object collision
1236	2011-12-16 07:40:00	Győr-Moson-Sopron	47.570667 17.57911	83 59+150	light injury	snowy	overcast	collosing opposite direction
1237	2011-12-16 07:45:00	Heves	47.691972 19.6925	2401-01-31 15:44:00	serious injury	snowy	sunny	collosing opposite direction
1238	2011-12-16 07:45:00	Győr-Moson-Sopron	47.552088 17.563449	83 59+150	light injury	snowy	sunny	track leaving, without solid object collision
1239	2011-12-16 08:55:00	Heves	48.113186 20.048827	2305 13+074	light injury	snowy	foggy	track leaving, without solid object collision
1240	2011-12-16 10:15:00	Győr-Moson-Sopron	47.826805 17.483694	1401 0+018	light injury	wet	sunny	pedestrian
1241	2011-12-16 10:30:00	Győr-Moson-Sopron	47.683972 17.635694	94000	light injury	normal	sunny	collision in same direction
1242	2011-12-16 15:55:00	Heves	47.793999 19.929222	24136 0+968	light injury	wet	overcast	collision in same direction
1243	2011-12-16 16:47:00	Győr-Moson-Sopron	47.876005 17.273475	94000	light injury	wet	rainy	collision in same direction
1244	2011-12-16 16:55:00	Heves	47.891776 20.391666	94000 0+000	serious injury	wet	overcast	pedestrian
1245	2011-12-16 17:45:00	Győr-Moson-Sopron	47.590833 17.049222	85 41+613	serious injury	wet	overcast	pedestrian
1246	2011-12-16 18:00:00	Győr-Moson-Sopron	47.680368 17.644576	94000	fatal	wet	rainy	pedestrian
1247	2011-12-16 18:35:00	Heves	47.784065 20.399817	2501 14+000	light injury	wet	rainy	collision in same direction
1248	2011-12-16 20:55:00	Győr-Moson-Sopron	47.706931 17.87397	94000	fatal	wet	rainy	pedestrian
1249	2011-12-17 08:15:00	Győr-Moson-Sopron	47.67975 17.645416	94000	serious injury	normal	sunny	collision in crossing direction
1250	2011-12-17 17:13:00	Győr-Moson-Sopron	47.561417 17.715138	94000	light injury	normal	sunny	pedestrian
1251	2011-12-18 05:10:00	Győr-Moson-Sopron	47.566444 17.323805	8422-05-31 18:00:00	light injury	wet	overcast	track leaving, with solid object collision
1252	2011-12-18 06:25:00	Heves	47.897137 20.374861	94000 0+000	light injury	normal	sunny	pedestrian
1253	2011-12-18 08:05:00	Heves	48.037331 20.280277	25 34+155	fatal	snowy	sunny	track leaving, with solid object collision
1254	2011-12-18 10:10:00	Heves	47.936758 20.112502	94000	light injury	normal	sunny	collision with turning
1255	2011-12-19 06:50:00	Heves	47.669305 19.621944	2134-01-01	light injury	wet	sunny	collision in crossing direction
1256	2011-12-19 10:30:00	Győr-Moson-Sopron	47.689362 16.600084	84 120+900	light injury	normal	overcast	collision in crossing direction
1257	2011-12-19 13:05:00	Heves	47.680777 20.317445	3208-11-01 00:21:00	light injury	normal	overcast	track leaving, with solid object collision
1258	2011-12-19 18:03:00	Győr-Moson-Sopron	47.682577 16.586434	84 128+400	serious injury	normal	overcast	collision in same direction
1259	2011-12-19 18:15:00	Heves	47.891082 20.378527	25 13+147	light injury	normal	overcast	collision with turning
1260	2011-12-20 17:10:00	Győr-Moson-Sopron	47.502963 16.785825	94000	serious injury	normal	sunny	pedestrian
1261	2011-12-20 23:30:00	Heves	48.043415 20.485166	2505 18+600	light injury	normal	sunny	slipping, carving, overturning on the road
1262	2011-12-21 05:40:00	Heves	47.851804 20.144889	2416 19+797	serious injury	wet	overcast	track leaving, with solid object collision
1263	2011-12-21 06:40:00	Heves	47.769305 19.916583	3 80+262	serious injury	normal	overcast	pedestrian
1264	2011-12-21 09:25:00	Győr-Moson-Sopron	47.663222 17.651944	94000	light injury	snowy	snowy	collision in crossing direction
1265	2011-12-21 12:45:00	Heves	47.719972 19.693083	2401-06-01 00:10:00	light injury	snowy	snowy	track leaving, without solid object collision
1266	2011-12-21 15:40:00	Heves	47.69761 20.073722	3204 13+900	light injury	snowy	overcast	track leaving, without solid object collision
1267	2011-12-22 10:35:00	Győr-Moson-Sopron	47.661361 17.626471	94000	light injury	wet	overcast	slipping, carving, overturning on the road
1268	2011-12-22 13:30:00	Heves	47.650139 19.64425	3104 28+600	light injury	wet	overcast	collosing opposite direction
1269	2011-12-22 16:10:00	Győr-Moson-Sopron	47.72775 17.599688	94000	light injury	wet	overcast	collision in crossing direction
1270	2011-12-23 11:30:00	Győr-Moson-Sopron	47.887416 17.328583	94000	serious injury	snowy	snowy	collision in crossing direction
1271	2011-12-24 01:31:00	Győr-Moson-Sopron	47.520722 17.49861	94000	light injury	wet	overcast	track leaving, without solid object collision
1272	2011-12-24 06:15:00	Heves	47.738876 19.975744	3204-05-01 02:00:00	light injury	snowy	overcast	track leaving, without solid object collision
1273	2011-12-24 11:00:00	Heves	47.6295 20.235722	3207-11-30 22:00:00	light injury	snowy	snowy	track leaving, without solid object collision
1274	2011-12-24 11:05:00	Heves	47.875804 20.416777	2503-01-31 17:55:00	light injury	snowy	snowy	collosing opposite direction
1275	2011-12-25 14:50:00	Heves	47.845415 20.37275	25 7+225	fatal	wet	sunny	collosing opposite direction
1276	2011-12-25 17:22:00	Győr-Moson-Sopron	47.621333 17.502333	84128 4+980	light injury	normal	sunny	collosing opposite direction
1277	2011-12-26 13:30:00	Győr-Moson-Sopron	47.564889 17.578888	83 63+472	light injury	wet	rainy	track leaving, without solid object collision
1278	2011-12-26 21:32:00	Győr-Moson-Sopron	47.729666 17.595055	1401 4+561	light injury	wet	overcast	collision in same direction
1279	2011-12-27 14:55:00	Győr-Moson-Sopron	47.46075 17.486388	94000	light injury	normal	sunny	collision with turning
1280	2011-12-28 16:37:00	Heves	47.785832 19.925111	2406 20+960	light injury	wet	overcast	pedestrian
1281	2011-12-28 17:00:00	Heves	47.728888 19.917333	M3 73+000	serious injury	wet	foggy	collision in same direction
1282	2011-12-28 17:45:00	Győr-Moson-Sopron	47.543445 17.549055	83 56+730	light injury	normal	overcast	collision with animals
1283	2011-12-28 22:15:00	Győr-Moson-Sopron	47.682279 16.590306	94000	light injury	normal	overcast	collision in crossing direction
1284	2011-12-29 05:00:00	Győr-Moson-Sopron	47.884027 17.29075	1401 0+036	light injury	normal	sunny	collision in crossing direction
1285	2011-12-29 12:15:00	Heves	47.675222 19.667583	94000 0+000	light injury	wet	overcast	track leaving, without solid object collision
1286	2011-12-30 13:40:00	Győr-Moson-Sopron	47.469639 17.079055	8611 15+060	serious injury	wet	sunny	collision in crossing direction
1287	2011-12-30 14:45:00	Győr-Moson-Sopron	47.682577 16.586434	84 128+350	serious injury	normal	sunny	track leaving, without solid object collision
1288	2011-12-30 15:05:00	Győr-Moson-Sopron	47.607472 17.244527	94000	light injury	wet	sunny	collision in crossing direction
1289	2011-12-31 13:17:00	Heves	47.765888 19.925555	94000 0+000	serious injury	normal	sunny	collision in crossing direction
1290	2011-12-31 18:10:00	Heves	47.680546 19.754042	3 64+200	fatal	normal	sunny	collosing opposite direction
1291	2012-01-01 04:18:00	Győr-Moson-Sopron	47.461445 17.837749	8218 17+250	light injury	wet	overcast	track leaving, with solid object collision
1292	2012-01-03 05:12:00	Győr-Moson-Sopron	47.671973 16.611834	86107 0+420	serious injury	wet	overcast	pedestrian
1293	2012-01-03 14:20:00	Heves	47.621722 20.316695	31 115+400	serious injury	normal	sunny	track leaving, without solid object collision
1294	2012-01-03 19:20:00	Győr-Moson-Sopron	47.521745 17.265792	86 139+550	light injury	wet	sunny	track leaving, without solid object collision
1295	2012-01-03 19:50:00	Győr-Moson-Sopron	47.614333 17.637333	83129 60+274	light injury	normal	sunny	collision in crossing direction
1296	2012-01-04 12:35:00	Győr-Moson-Sopron	47.50675 17.081159	8611-09-30 16:30:00	serious injury	normal	overcast	collision in crossing direction
1297	2012-01-04 16:50:00	Heves	47.77861 19.925	94000	light injury	wet	overcast	pedestrian
1298	2012-01-05 08:15:00	Heves	47.896526 20.368	25 14+203	light injury	wet	overcast	pedestrian
1299	2012-01-05 09:00:00	Heves	47.770194 19.932583	94000	serious injury	wet	overcast	collision in crossing direction
1300	2012-01-05 18:35:00	Győr-Moson-Sopron	47.67939 16.58275	94000	light injury	normal	overcast	pedestrian
1301	2012-01-06 09:00:00	Győr-Moson-Sopron	47.689148 16.586003	94000	serious injury	normal	sunny	pedestrian
1302	2012-01-06 22:30:00	Heves	47.66777 19.623266	M3 50+950	serious injury	wet	overcast	collision with stopped vehicle
1303	2012-01-07 09:56:00	Győr-Moson-Sopron	47.872764 17.271101	94000	light injury	normal	overcast	collision in crossing direction
1304	2012-01-07 10:20:00	Heves	47.664805 19.658972	3 56+100	light injury	normal	sunny	track leaving, without solid object collision
1305	2012-01-07 11:05:00	Heves	47.898276 20.374333	94000	light injury	normal	sunny	pedestrian
1306	2012-01-08 09:50:00	Győr-Moson-Sopron	47.464583 17.112888	8428 13+208	light injury	wet	sunny	collision in crossing direction
1307	2012-01-08 17:15:00	Győr-Moson-Sopron	47.592527 17.131333	85 35+650	serious injury	normal	sunny	collision in same direction
1308	2012-01-09 07:24:00	Győr-Moson-Sopron	47.677419 17.636235	94000	light injury	wet	overcast	collision in crossing direction
1309	2012-01-10 08:15:00	Győr-Moson-Sopron	47.682577 16.586434	8518 24+200	light injury	wet	rainy	collision in same direction
1310	2012-01-11 06:15:00	Győr-Moson-Sopron	47.700111 17.678972	94000	light injury	normal	sunny	collision with turning
1311	2012-01-11 07:10:00	Győr-Moson-Sopron	47.828805 17.372472	M1 151+250	fatal	normal	sunny	track leaving, with solid object collision
1312	2012-01-11 09:21:00	Győr-Moson-Sopron	47.708111 17.729222	94000	light injury	normal	overcast	slipping, carving, overturning on the road
1313	2012-01-11 14:02:00	Győr-Moson-Sopron	47.674639 17.678833	8136 52+120	light injury	normal	overcast	collision with stopped vehicle
1314	2012-01-11 16:10:00	Heves	47.842971 20.286527	2416 32+931	serious injury	oily	sunny	collosing opposite direction
1315	2012-01-12 08:15:00	Heves	47.668722 19.705555	94000	serious injury	snowy	sunny	collision with turning
1316	2012-01-12 08:50:00	Heves	47.646778 19.644528	3104 28+111	light injury	snowy	sunny	track leaving, without solid object collision
1317	2012-01-12 13:48:00	Győr-Moson-Sopron	47.589305 17.123249	86301 0+194	fatal	normal	sunny	collision of train and vehicle
1318	2012-01-12 16:50:00	Heves	47.550667 20.371278	3209-07-31 18:00:00	light injury	normal	sunny	pedestrian
1319	2012-01-13 14:50:00	Győr-Moson-Sopron	47.677327 17.652898	94000	serious injury	snowy	snowy	collision in crossing direction
1320	2012-01-13 18:58:00	Győr-Moson-Sopron	47.687709 16.584337	94000	serious injury	wet	overcast	pedestrian
1321	2012-01-13 22:50:00	Győr-Moson-Sopron	47.679374 16.582855	94000	serious injury	wet	overcast	collision in crossing direction
1322	2012-01-14 01:40:00	Győr-Moson-Sopron	47.465972 17.112333	8606 13+088	serious injury	wet	overcast	track leaving, without solid object collision
1323	2012-01-14 01:55:00	Győr-Moson-Sopron	47.465361 17.114083	86 125+950	serious injury	wet	overcast	pedestrian
1324	2012-01-14 14:55:00	Győr-Moson-Sopron	47.681927 16.597583	94000	light injury	normal	sunny	collision with stopped vehicle
1325	2012-01-14 16:55:00	Győr-Moson-Sopron	47.607583 17.624055	94000	serious injury	wet	overcast	pedestrian
1326	2012-01-14 21:10:00	Győr-Moson-Sopron	47.631583 17.63661	83129 2+275	serious injury	normal	sunny	collosing opposite direction
1327	2012-01-15 04:24:00	Heves	47.722444 20.298639	M3 104+800	light injury	normal	sunny	track leaving, without solid object collision
1328	2012-01-15 07:15:00	Győr-Moson-Sopron	47.643639 17.728777	81 75+830	light injury	normal	sunny	track leaving, without solid object collision
1329	2012-01-15 17:05:00	Győr-Moson-Sopron	47.664916 17.66311	94000	light injury	normal	sunny	collision with turning
1330	2012-01-16 06:22:00	Győr-Moson-Sopron	47.684027 17.635527	1 1260+086	serious injury	wet	sunny	pedestrian
1331	2012-01-17 09:00:00	Győr-Moson-Sopron	47.618722 17.582416	8417-12-31 22:35:00	light injury	snowy	snowy	track leaving, without solid object collision
1332	2012-01-17 12:40:00	Győr-Moson-Sopron	47.486777 17.01686	8603 20+250	light injury	normal	overcast	track leaving, without solid object collision
1333	2012-01-18 07:05:00	Győr-Moson-Sopron	47.689001 16.58575	94000	light injury	normal	overcast	pedestrian
1334	2012-01-19 07:30:00	Győr-Moson-Sopron	47.671945 16.611973	86107 0+420	serious injury	normal	overcast	collision in same direction
1335	2012-01-19 17:05:00	Győr-Moson-Sopron	47.69664 16.581084	94000	serious injury	wet	rainy	pedestrian
1336	2012-01-19 17:26:00	Győr-Moson-Sopron	47.697639 17.666499	94000	serious injury	wet	rainy	collision in same direction
1337	2012-01-19 18:04:00	Győr-Moson-Sopron	47.603278 17.652749	94000	serious injury	wet	rainy	collision with turning
1338	2012-01-20 04:25:00	Győr-Moson-Sopron	47.668722 17.653777	94000	serious injury	wet	rainy	collision in crossing direction
1339	2012-01-20 06:55:00	Heves	47.799568 20.354717	25 1+500	serious injury	wet	overcast	collosing opposite direction
1340	2012-01-20 07:15:00	Győr-Moson-Sopron	47.674694 17.638916	94000	light injury	wet	overcast	collision in crossing direction
1341	2012-01-20 12:20:00	Győr-Moson-Sopron	47.640639 16.64375	84 114+400	light injury	normal	overcast	collision in same direction
1342	2012-01-20 15:05:00	Győr-Moson-Sopron	47.691444 17.631666	94000	light injury	wet	rainy	collision in crossing direction
1343	2012-01-20 16:00:00	Győr-Moson-Sopron	47.448675 16.901479	8621 16+500	light injury	wet	rainy	track leaving, with solid object collision
1344	2012-01-20 20:45:00	Győr-Moson-Sopron	47.386852 17.865639	82 37+550	serious injury	wet	overcast	track leaving, without solid object collision
1345	2012-01-21 02:50:00	Győr-Moson-Sopron	47.890234 17.325964	1407 2+550	light injury	snowy	sunny	track leaving, with solid object collision
1346	2012-01-21 05:00:00	Győr-Moson-Sopron	47.630145 17.771255	81 71+690	serious injury	snowy	sunny	track leaving, with solid object collision
1347	2012-01-21 05:24:00	Győr-Moson-Sopron	47.762999 17.436444	1 144+712	serious injury	snowy	overcast	track leaving, without solid object collision
1348	2012-01-21 09:36:00	Győr-Moson-Sopron	47.698472 17.665722	94000	fatal	snowy	sunny	pedestrian
1349	2012-01-21 10:10:00	Heves	47.915137 20.376277	94000	serious injury	wet	sunny	collision in crossing direction
1350	2012-01-21 17:35:00	Győr-Moson-Sopron	47.690019 16.576734	94000	serious injury	wet	snowy	pedestrian
1351	2012-01-21 21:30:00	Győr-Moson-Sopron	47.519994 16.911224	8612 16+700	serious injury	wet	rainy	track leaving, with solid object collision
1352	2012-01-22 01:45:00	Heves	47.7272 19.894997	M3 73+050	light injury	snowy	snowy	collision in same direction
1353	2012-01-22 07:37:00	Győr-Moson-Sopron	47.692778 17.691722	94000	light injury	wet	sunny	track leaving, with solid object collision
1354	2012-01-22 18:50:00	Győr-Moson-Sopron	47.69243 16.580406	94000	light injury	wet	rainy	pedestrian
1355	2012-01-23 07:10:00	Heves	47.684277 20.483556	33 13+250	light injury	snowy	sunny	track leaving, without solid object collision
1356	2012-01-23 07:20:00	Heves	47.620305 20.270278	3204 32+750	light injury	wet	sunny	track leaving, without solid object collision
1357	2012-01-23 08:15:00	Győr-Moson-Sopron	47.85212 17.175597	94000	serious injury	normal	sunny	collision with stopped vehicle
1358	2012-01-23 17:45:00	Győr-Moson-Sopron	47.67939 16.58275	94000	light injury	normal	sunny	pedestrian
1359	2012-01-23 19:45:00	Győr-Moson-Sopron	47.867055 17.273528	94000	light injury	normal	overcast	collision in crossing direction
1360	2012-01-24 04:45:00	Győr-Moson-Sopron	47.856444 17.242305	M1 161+773	light injury	wet	rainy	collision in same direction
1361	2012-01-24 11:20:00	Győr-Moson-Sopron	47.67989 16.585723	86107 2+667	light injury	wet	sunny	pedestrian
1362	2012-01-24 12:30:00	Győr-Moson-Sopron	47.671333 17.654642	94000	light injury	normal	sunny	collision in same direction
1363	2012-01-24 22:08:00	Győr-Moson-Sopron	47.644944 17.425444	85 120+190	serious injury	not a road	sunny	collision with turning
1364	2012-01-25 06:06:00	Győr-Moson-Sopron	47.704222 17.672777	94000	serious injury	normal	sunny	collision in crossing direction
1365	2012-01-25 07:25:00	Heves	47.800165 20.355222	25 1+540	serious injury	wet	sunny	collosing opposite direction
1366	2012-01-25 07:50:00	Heves	47.699805 20.428361	94000	serious injury	normal	sunny	collision in crossing direction
1367	2012-01-25 13:34:00	Győr-Moson-Sopron	47.558967 17.237314	8601-09-30 20:08:00	fatal	normal	sunny	collision of train and vehicle
1368	2012-01-25 16:05:00	Győr-Moson-Sopron	47.870332 17.270639	94000	light injury	normal	sunny	collision in crossing direction
1369	2012-01-25 17:55:00	Győr-Moson-Sopron	47.777833 17.064305	8507-05-31 18:10:00	fatal	normal	sunny	pedestrian
1370	2012-01-25 18:45:00	Győr-Moson-Sopron	47.608657 16.891317	8518-12-31 15:10:00	fatal	normal	sunny	track leaving, without solid object collision
1371	2012-01-26 13:35:00	Heves	47.722534 20.303286	M3 105+000	serious injury	wet	overcast	collision in same direction
1372	2012-01-27 10:48:00	Heves	47.85011 20.227916	94000	light injury	snowy	sunny	track leaving, without solid object collision
1373	2012-01-27 10:55:00	Győr-Moson-Sopron	47.683416 17.621833	94000	light injury	normal	sunny	collision with stopped vehicle
1374	2012-01-27 13:10:00	Heves	47.910638 19.941166	2408 31+500	serious injury	snowy	sunny	track leaving, without solid object collision
1375	2012-01-27 14:35:00	Győr-Moson-Sopron	47.679639 17.63836	82 750+662	light injury	normal	sunny	pedestrian
1376	2012-01-28 01:05:00	Győr-Moson-Sopron	47.685833 17.640416	1 125+000	light injury	normal	sunny	collision in crossing direction
1377	2012-01-28 08:50:00	Heves	47.949348 20.384703	2505 1+980	light injury	normal	overcast	track leaving, without solid object collision
1378	2012-01-28 18:20:00	Heves	47.905054 20.375833	94000	serious injury	normal	overcast	pedestrian
1379	2012-01-29 18:30:00	Győr-Moson-Sopron	47.657697 16.627688	84 117+050	light injury	normal	overcast	track leaving, without solid object collision
1380	2012-01-29 22:25:00	Heves	47.744267 20.252827	3207-12-31 17:40:00	serious injury	normal	sunny	track leaving, with solid object collision
1381	2012-01-31 18:00:00	Győr-Moson-Sopron	47.870721 17.26875	86 187+500	light injury	normal	sunny	pedestrian
1382	2012-02-01 10:33:00	Győr-Moson-Sopron	47.690944 17.640944	94000	light injury	normal	sunny	collision in crossing direction
1383	2012-02-01 11:35:00	Győr-Moson-Sopron	47.596111 16.799111	85 62+100	light injury	normal	sunny	collision in same direction
1384	2012-02-01 13:28:00	Győr-Moson-Sopron	47.57875 17.697166	82 62+820	light injury	normal	sunny	track leaving, without solid object collision
1385	2012-02-01 17:36:00	Győr-Moson-Sopron	47.673278 17.65011	94000	serious injury	normal	sunny	pedestrian
1386	2012-02-02 21:55:00	Győr-Moson-Sopron	47.877055 17.259555	1 160+100	light injury	normal	sunny	collision in crossing direction
1387	2012-02-03 18:10:00	Győr-Moson-Sopron	47.621449 17.67758	82 68+112	serious injury	normal	overcast	collision in crossing direction
1388	2012-02-04 07:05:00	Győr-Moson-Sopron	47.684668 16.573	86107 3+914	light injury	normal	overcast	track leaving, without solid object collision
1389	2012-02-04 08:30:00	Heves	47.948804 20.092694	94000	serious injury	snowy	snowy	slipping, carving, overturning on the road
1390	2012-02-04 12:45:00	Heves	47.892137 21.797893	M3 918+000	light injury	snowy	snowy	collision with solid obstacle
1391	2012-02-06 04:50:00	Győr-Moson-Sopron	47.582944 16.714222	84 102+654	serious injury	normal	overcast	track leaving, with solid object collision
1392	2012-02-06 15:27:00	Győr-Moson-Sopron	47.654222 17.465138	85 8+966	light injury	snowy	snowy	track leaving, without solid object collision
1393	2012-02-06 17:10:00	Győr-Moson-Sopron	47.579222 17.580638	83 61+850	serious injury	snowy	snowy	collosing opposite direction
1394	2012-02-06 17:34:00	Győr-Moson-Sopron	47.692473 16.580556	94000	serious injury	snowy	snowy	pedestrian
1395	2012-02-06 19:00:00	Győr-Moson-Sopron	47.714694 17.512444	1 136+450	serious injury	snowy	snowy	collosing opposite direction
1396	2012-02-07 10:00:00	Győr-Moson-Sopron	47.643917 17.63786	83129 1+056	serious injury	snowy	snowy	collosing opposite direction
1397	2012-02-07 12:40:00	Heves	47.918721 20.3695	25 16+950	light injury	wet	sunny	pedestrian
1398	2012-02-07 15:40:00	Győr-Moson-Sopron	47.725473 16.623139	8527-03-31 20:37:00	light injury	snowy	snowy	track leaving, with solid object collision
1399	2012-02-08 21:20:00	Győr-Moson-Sopron	47.727863 16.558445	84 126+550	serious injury	normal	sunny	collision with animals
1400	2012-02-09 13:30:00	Győr-Moson-Sopron	47.622222 16.672361	84 111+450	light injury	normal	overcast	collision in same direction
1401	2012-02-09 15:40:00	Győr-Moson-Sopron	47.683527 17.633749	94000	light injury	wet	sunny	pedestrian
1402	2012-02-10 15:30:00	Győr-Moson-Sopron	47.694361 17.512416	M1 132+478	light injury	normal	sunny	track leaving, with solid object collision
1403	2012-02-12 09:58:00	Győr-Moson-Sopron	47.808974 17.364571	1 152+400	fatal	normal	sunny	track leaving, without solid object collision
1404	2012-02-13 12:30:00	Győr-Moson-Sopron	47.684718 16.600052	94000	serious injury	normal	sunny	pedestrian
1405	2012-02-14 05:40:00	Győr-Moson-Sopron	47.656666 17.475694	85 8+200	serious injury	wet	sunny	collosing opposite direction
1406	2012-02-15 08:28:00	Győr-Moson-Sopron	47.885721 17.335528	1401 32+400	light injury	snowy	snowy	track leaving, without solid object collision
1407	2012-02-15 10:08:00	Győr-Moson-Sopron	47.77011 17.427361	1 145+600	serious injury	snowy	snowy	track leaving, without solid object collision
1408	2012-02-15 15:05:00	Győr-Moson-Sopron	47.877082 17.258805	94000	light injury	snowy	overcast	pedestrian
1409	2012-02-15 16:52:00	Heves	47.708555 19.826555	3 70+108	serious injury	snowy	snowy	track leaving, with solid object collision
1410	2012-02-15 17:30:00	Heves	47.663138 20.1485	3204 21+860	light injury	snowy	snowy	track leaving, without solid object collision
1411	2012-02-15 22:00:00	Győr-Moson-Sopron	47.716833 17.617583	1401 14+000	light injury	normal	sunny	collision in same direction
1412	2012-02-16 07:00:00	Győr-Moson-Sopron	47.621278 17.59061	83 66+460	serious injury	snowy	overcast	collision with turning
1413	2012-02-16 07:50:00	Heves	47.77461 19.935389	3 81+900	serious injury	snowy	overcast	collision in same direction
1414	2012-02-16 08:40:00	Győr-Moson-Sopron	47.908138 17.253667	150 4+550	light injury	snowy	overcast	track leaving, without solid object collision
1415	2012-02-17 10:05:00	Győr-Moson-Sopron	47.677166 17.642444	94000	fatal	snowy	snowy	pedestrian
1416	2012-02-19 06:46:00	Győr-Moson-Sopron	47.6635 17.746833	8136 46+154	light injury	snowy	sunny	track leaving, without solid object collision
1417	2012-02-20	Heves	47.667222 19.679805	94000	light injury	snowy	overcast	track leaving, with solid object collision
1418	2012-02-20 05:50:00	Győr-Moson-Sopron	47.662111 17.504499	85 5+800	light injury	normal	sunny	collosing opposite direction
1419	2012-02-20 07:12:00	Győr-Moson-Sopron	47.873952 17.36598	1401 29+819	light injury	snowy	overcast	track leaving, without solid object collision
1420	2012-02-20 10:27:00	Győr-Moson-Sopron	47.698889 17.632638	94000	light injury	normal	sunny	collision in crossing direction
1421	2012-02-20 12:00:00	Heves	47.750888 20.416472	33101 3+063	serious injury	snowy	sunny	not driver accident
1422	2012-02-21 05:35:00	Győr-Moson-Sopron	47.692418 16.580473	94000	light injury	wet	sunny	pedestrian
1423	2012-02-21 07:50:00	Győr-Moson-Sopron	47.819969 17.334804	1 154+650	serious injury	snowy	sunny	pedestrian
1424	2012-02-21 08:10:00	Győr-Moson-Sopron	47.536056 17.533527	83 54+970	light injury	snowy	sunny	track leaving, without solid object collision
1425	2012-02-21 08:45:00	Győr-Moson-Sopron	47.561028 17.731388	82122 1+150	light injury	snowy	sunny	track leaving, without solid object collision
1426	2012-02-22 08:50:00	Győr-Moson-Sopron	47.621584 17.304732	85 21+950	light injury	normal	overcast	collosing opposite direction
1427	2012-02-22 15:18:00	Győr-Moson-Sopron	47.663944 17.749583	8136 45+652	light injury	normal	sunny	collision in crossing direction
1428	2012-02-23 05:15:00	Győr-Moson-Sopron	47.834666 17.296805	1 154+875	light injury	snowy	sunny	track leaving, without solid object collision
1429	2012-02-23 06:25:00	Győr-Moson-Sopron	47.82511 17.32525	1 0+156	light injury	snowy	sunny	track leaving, without solid object collision
1430	2012-02-23 07:25:00	Heves	47.870526 20.382611	25 10+789	light injury	not a road	overcast	collision with turning
1431	2012-02-23 07:30:00	Győr-Moson-Sopron	47.621556 17.719027	8222-03-31 16:26:00	serious injury	snowy	sunny	track leaving, without solid object collision
1432	2012-02-23 08:30:00	Győr-Moson-Sopron	47.607277 16.901694	8517-12-31 20:00:00	light injury	oily	sunny	track leaving, with solid object collision
1433	2012-02-23 13:30:00	Győr-Moson-Sopron	47.879388 17.264805	94000	light injury	normal	sunny	collision in crossing direction
1434	2012-02-24 09:20:00	Heves	47.899054 20.373916	94000	light injury	normal	sunny	not driver accident
1435	2012-02-24 15:25:00	Győr-Moson-Sopron	47.68331 16.599115	94000	light injury	normal	overcast	collision in same direction
1436	2012-02-24 15:49:00	Győr-Moson-Sopron	47.555473 17.896444	81 59+147	light injury	normal	sunny	collision in crossing direction
1437	2012-02-25 12:55:00	Győr-Moson-Sopron	47.441668 17.792805	8302 30+000	serious injury	normal	sunny	collision in crossing direction
1438	2012-02-25 17:48:00	Győr-Moson-Sopron	47.717555 17.635388	94000	light injury	normal	overcast	pedestrian
1439	2012-02-25 20:19:00	Győr-Moson-Sopron	47.683558 16.585151	94000	light injury	normal	sunny	collosing opposite direction
1440	2012-02-26 15:15:00	Győr-Moson-Sopron	47.689223 16.601084	84 120+987	light injury	wet	overcast	pedestrian
1441	2012-02-27 10:40:00	Győr-Moson-Sopron	47.674666 17.638944	94000	light injury	normal	overcast	collision in crossing direction
1442	2012-02-27 14:40:00	Győr-Moson-Sopron	47.638611 17.60711	94000	light injury	normal	sunny	collision in crossing direction
1443	2012-02-28 09:08:00	Győr-Moson-Sopron	47.73 17.848861	8152 0+725	serious injury	snowy	overcast	track leaving, without solid object collision
1444	2012-02-28 09:20:00	Heves	47.685138 19.923444	3203-09-30 22:13:00	light injury	normal	overcast	collision in crossing direction
1445	2012-02-28 14:49:00	Győr-Moson-Sopron	47.684389 17.633222	94000	light injury	wet	overcast	pedestrian
1446	2012-02-28 20:00:00	Győr-Moson-Sopron	47.706222 17.731944	94000	light injury	wet	rainy	collision with stopped vehicle
1447	2012-03-01 07:20:00	Győr-Moson-Sopron	47.680722 17.635499	94000	serious injury	normal	sunny	pedestrian
1448	2012-03-01 11:15:00	Heves	47.891054 20.378833	25 13+148	light injury	normal	sunny	collision with turning
1449	2012-03-01 12:45:00	Heves	47.886498 20.397305	2501 1+375	light injury	normal	sunny	collision in same direction
1450	2012-03-02 20:15:00	Győr-Moson-Sopron	47.878999 17.274361	94000	light injury	normal	sunny	collision in crossing direction
1451	2012-03-03 18:30:00	Győr-Moson-Sopron	47.638616 17.369634	85 16+450	fatal	normal	sunny	collosing opposite direction
1452	2012-03-04 01:00:00	Heves	47.73561 20.260694	3208-01-31 15:20:00	light injury	normal	sunny	track leaving, without solid object collision
1453	2012-03-04 15:05:00	Győr-Moson-Sopron	47.656528 17.633916	94000	serious injury	normal	sunny	track leaving, with solid object collision
1454	2012-03-05 13:50:00	Győr-Moson-Sopron	47.675029 16.599639	86107 1+437	light injury	normal	sunny	collision in same direction
1455	2012-03-05 14:40:00	Heves	47.908629 20.382646	2504 1+065	fatal	normal	sunny	pedestrian
1456	2012-03-05 16:40:00	Heves	47.80211 20.006222	2416-04-30 21:11:00	light injury	normal	sunny	collision with animals
1457	2012-03-06 04:55:00	Győr-Moson-Sopron	47.688777 17.644472	94000	light injury	normal	sunny	collision in same direction
1458	2012-03-08 18:15:00	Heves	47.899026 20.367416	25 14+494	light injury	normal	sunny	collision in crossing direction
1459	2012-03-08 18:45:00	Heves	47.78381 19.918985	94000	light injury	normal	sunny	pedestrian
1460	2012-03-10 14:00:00	Heves	47.916522 19.904856	2408 26+400	light injury	normal	sunny	track leaving, with solid object collision
1461	2012-03-10 15:30:00	Heves	47.902432 20.377187	94000	light injury	not a road	sunny	pedestrian
1462	2012-03-11 07:30:00	Heves	47.783234 19.968061	2415-12-31 21:00:00	light injury	wet	overcast	track leaving, without solid object collision
1463	2012-03-12 13:00:00	Győr-Moson-Sopron	47.679252 16.594639	94000	light injury	normal	overcast	track leaving, without solid object collision
1464	2012-03-12 13:55:00	Győr-Moson-Sopron	47.866721 17.272222	1 162+700	light injury	wet	overcast	pedestrian
1465	2012-03-12 18:30:00	Győr-Moson-Sopron	47.58873 16.861217	94000	light injury	normal	overcast	collision in crossing direction
1466	2012-03-13 08:20:00	Heves	47.759693 20.243361	3 109+818	serious injury	normal	sunny	pedestrian
1467	2012-03-13 09:15:00	Heves	47.85042 20.224907	94000	serious injury	normal	sunny	pedestrian
1468	2012-03-14 13:20:00	Heves	47.815302 19.864958	94000	serious injury	normal	overcast	collosing opposite direction
1469	2012-03-14 14:00:00	Győr-Moson-Sopron	47.722667 16.649	8526 11+690	serious injury	normal	overcast	collision with turning
1470	2012-03-14 16:35:00	Heves	47.756668 20.185333	3 105+250	serious injury	normal	sunny	collision with turning
1471	2012-03-14 16:45:00	Győr-Moson-Sopron	47.592781 17.022476	94000	light injury	normal	sunny	pedestrian
1472	2012-03-14 17:30:00	Győr-Moson-Sopron	47.675402 16.598959	86107 1+437	light injury	normal	overcast	collosing opposite direction
1473	2012-03-15 06:10:00	Győr-Moson-Sopron	47.790776 17.325868	M1 149+952	serious injury	normal	sunny	collision in same direction
1474	2012-03-16 08:55:00	Heves	47.622972 20.256056	3204 31+600	light injury	normal	sunny	collision in same direction
1475	2012-03-16 10:10:00	Győr-Moson-Sopron	47.688194 17.641194	94000	light injury	normal	sunny	collision in crossing direction
1476	2012-03-16 13:10:00	Győr-Moson-Sopron	47.687585 16.508473	94000	serious injury	normal	sunny	collision with stopped vehicle
1477	2012-03-16 14:00:00	Heves	47.804666 19.949278	24 3+800	serious injury	normal	sunny	collision with turning
1478	2012-03-16 14:05:00	Győr-Moson-Sopron	47.634777 17.47811	94000	light injury	normal	sunny	collision in crossing direction
1479	2012-03-17 06:05:00	Győr-Moson-Sopron	47.586814 17.693809	94000	light injury	normal	sunny	track leaving, without solid object collision
1480	2012-03-17 09:00:00	Heves	47.710159 20.297696	3208-06-30 23:42:00	serious injury	normal	sunny	track leaving, with solid object collision
1481	2012-03-17 09:10:00	Heves	47.763471 20.223944	3 108+296	fatal	normal	sunny	track leaving, without solid object collision
1482	2012-03-17 12:30:00	Győr-Moson-Sopron	47.677639 17.652777	94000	serious injury	normal	sunny	collision in crossing direction
1483	2012-03-17 15:25:00	Heves	47.650511 19.725955	32 2+467	light injury	normal	sunny	collision with turning
1484	2012-03-17 18:15:00	Győr-Moson-Sopron	47.68975 17.721749	94000	light injury	normal	sunny	slipping, carving, overturning on the road
1485	2012-03-18 10:18:00	Győr-Moson-Sopron	47.7075 17.673166	94000	light injury	normal	sunny	collision in crossing direction
1486	2012-03-18 14:30:00	Győr-Moson-Sopron	47.58712 16.980763	85 46+100	light injury	normal	sunny	collision in same direction
1487	2012-03-18 14:30:00	Heves	47.913142 19.989063	24 24+100	serious injury	normal	sunny	track leaving, without solid object collision
1488	2012-03-18 18:14:00	Győr-Moson-Sopron	47.615861 17.728083	8222 6+794	serious injury	normal	sunny	track leaving, without solid object collision
1489	2012-03-18 21:35:00	Heves	47.818239 20.413177	94000	serious injury	normal	sunny	slipping, carving, overturning on the road
1490	2012-03-20 09:55:00	Győr-Moson-Sopron	47.683389 17.627944	94000	light injury	normal	sunny	collision in crossing direction
1491	2012-03-20 18:10:00	Győr-Moson-Sopron	47.641555 17.608694	94000	light injury	not a road	sunny	collision in crossing direction
1492	2012-03-21 07:10:00	Győr-Moson-Sopron	47.998666 17.184611	M15 12+650	light injury	normal	sunny	collosing opposite direction
1493	2012-03-21 11:00:00	Győr-Moson-Sopron	47.68375 17.635722	82 733+159	light injury	normal	sunny	collision in same direction
1494	2012-03-21 18:50:00	Heves	47.88945 20.382254	2501 0+200	serious injury	normal	sunny	collision in crossing direction
1495	2012-03-22 07:30:00	Győr-Moson-Sopron	47.469532 17.868662	8218 13+629	serious injury	normal	sunny	track leaving, without solid object collision
1496	2012-03-22 18:40:00	Győr-Moson-Sopron	47.960694 17.217083	150 10+100	serious injury	normal	sunny	pedestrian
1497	2012-03-23 07:29:00	Győr-Moson-Sopron	47.683861 17.569388	1 131+241	light injury	normal	sunny	collision in same direction
1498	2012-03-23 11:37:00	Győr-Moson-Sopron	47.631722 17.671221	82 69+330	serious injury	normal	sunny	collision with turning
1499	2012-03-23 17:40:00	Győr-Moson-Sopron	47.732833 17.829694	1 109+524	light injury	normal	sunny	track leaving, without solid object collision
1500	2012-03-24 13:35:00	Győr-Moson-Sopron	47.656944 17.632833	94000	light injury	normal	sunny	collision in crossing direction
1501	2012-03-24 17:15:00	Heves	47.798205 19.87374	2406 16+700	serious injury	normal	sunny	track leaving, without solid object collision
1502	2012-03-24 18:55:00	Győr-Moson-Sopron	47.668112 16.595	8645 0+940	serious injury	normal	sunny	track leaving, without solid object collision
1503	2012-03-26 05:05:00	Győr-Moson-Sopron	47.642889 17.662888	82 70+750	light injury	normal	sunny	collision with turning
1504	2012-03-26 08:06:00	Győr-Moson-Sopron	47.68575 17.65261	81 82+223	light injury	normal	sunny	collision in crossing direction
1505	2012-03-26 12:00:00	Heves	47.706477 20.104021	M3 89+730	light injury	normal	sunny	collision in same direction
1506	2012-03-26 15:40:00	Győr-Moson-Sopron	47.615388 17.25511	86 151+060	serious injury	normal	sunny	collision in crossing direction
1507	2012-03-26 16:15:00	Győr-Moson-Sopron	47.865463 17.270737	94000	light injury	normal	sunny	collision in crossing direction
1508	2012-03-26 20:50:00	Győr-Moson-Sopron	47.680278 17.657833	81 81+188	serious injury	normal	sunny	pedestrian
1509	2012-03-27 16:35:00	Győr-Moson-Sopron	47.554638 17.062027	8516-04-30 23:53:00	light injury	normal	sunny	collision in crossing direction
1510	2012-03-28 07:25:00	Heves	47.816183 20.408408	2501-07-31 23:00:00	serious injury	normal	sunny	collision in same direction
1511	2012-03-28 08:05:00	Győr-Moson-Sopron	47.655916 17.472555	85 7+677	serious injury	normal	sunny	collision in same direction
1512	2012-03-28 18:02:00	Győr-Moson-Sopron	47.633806 17.755805	81 74+533	serious injury	normal	sunny	track leaving, with solid object collision
1513	2012-03-29 08:20:00	Győr-Moson-Sopron	47.538363 16.752966	94000	light injury	normal	sunny	track leaving, with solid object collision
1514	2012-03-29 11:50:00	Győr-Moson-Sopron	47.600361 16.780166	8524 0+541	serious injury	normal	sunny	collision of train and vehicle
1515	2012-03-29 17:25:00	Győr-Moson-Sopron	47.644194 17.615583	83 69+889	light injury	normal	overcast	collision with turning
1516	2012-03-29 17:50:00	Heves	47.63975 20.641445	33 25+586	serious injury	normal	sunny	track leaving, without solid object collision
1517	2012-03-29 22:18:00	Győr-Moson-Sopron	47.871055 17.287305	94000	serious injury	normal	overcast	slipping, carving, overturning on the road
1518	2012-03-30 05:30:00	Heves	47.767082 20.006141	3 87+300	fatal	wet	overcast	track leaving, with solid object collision
1519	2012-03-30 08:15:00	Heves	47.997443 20.155055	2413 15+622	serious injury	normal	sunny	track leaving, without solid object collision
1520	2012-03-30 09:00:00	Heves	47.77311 19.921472	94000	light injury	normal	sunny	collision in crossing direction
1521	2012-03-30 14:45:00	Győr-Moson-Sopron	47.689212 16.585686	94000	light injury	normal	sunny	pedestrian
1522	2012-03-30 16:55:00	Győr-Moson-Sopron	47.828055 17.208222	86 180+400	serious injury	wet	overcast	collosing opposite direction
1523	2012-03-30 22:35:00	Győr-Moson-Sopron	47.670805 17.652027	94000	light injury	wet	rainy	collision in crossing direction
1524	2012-03-31 09:08:00	Győr-Moson-Sopron	47.683862 16.592306	94000	light injury	normal	overcast	collision in same direction
1525	2012-03-31 19:30:00	Győr-Moson-Sopron	47.739861 17.644666	14 6+443	serious injury	normal	overcast	track leaving, without solid object collision
1526	2012-04-02 04:25:00	Heves	47.7125 20.215174	M3 98+200	serious injury	normal	sunny	collision in same direction
1527	2012-04-02 10:07:00	Győr-Moson-Sopron	47.61925 17.604527	94000	serious injury	not a road	sunny	pedestrian
1528	2012-04-02 11:00:00	Győr-Moson-Sopron	47.687402 16.592213	94000	fatal	normal	sunny	collision in same direction
1529	2012-04-02 21:55:00	Győr-Moson-Sopron	47.831944 17.298361	1 154+200	light injury	normal	sunny	collision with animals
1530	2012-04-03 08:15:00	Heves	47.624333 20.245889	3204 30+725	light injury	normal	sunny	track leaving, with solid object collision
1531	2012-04-03 17:25:00	Győr-Moson-Sopron	47.638945 16.637278	8645-07-31 19:20:00	fatal	normal	sunny	collision in crossing direction
1532	2012-04-04 14:45:00	Győr-Moson-Sopron	47.591817 17.020038	94000	serious injury	normal	sunny	collision in crossing direction
1533	2012-04-04 15:09:00	Győr-Moson-Sopron	47.661472 17.637499	821 0+070	fatal	normal	sunny	track leaving, without solid object collision
1534	2012-04-04 23:25:00	Heves	47.822027 20.231083	2417-06-30 17:44:00	serious injury	normal	sunny	track leaving, with solid object collision
1535	2012-04-05 13:23:00	Győr-Moson-Sopron	47.86536 17.258528	94000	light injury	normal	sunny	collision in same direction
1536	2012-04-05 16:15:00	Győr-Moson-Sopron	47.882388 17.247055	1 164+442	serious injury	normal	sunny	track leaving, without solid object collision
1537	2012-04-05 23:15:00	Heves	48.054998 20.350805	2506-07-31 23:01:00	light injury	wet	overcast	track leaving, without solid object collision
1538	2012-04-05 23:15:00	Heves	47.930554 20.486805	2504-11-30 21:03:00	light injury	wet	overcast	track leaving, without solid object collision
1539	2012-04-06 02:30:00	Győr-Moson-Sopron	47.889277 17.184287	M1 162+680	light injury	wet	rainy	collision in same direction
1540	2012-04-06 15:10:00	Heves	47.885799 20.38082	25 12+503	light injury	normal	overcast	collision with turning
1541	2012-04-06 18:55:00	Heves	47.910915 20.369944	94000	light injury	normal	overcast	slipping, carving, overturning on the road
1542	2012-04-06 23:35:00	Győr-Moson-Sopron	47.7195 17.609999	94000	light injury	wet	overcast	track leaving, with solid object collision
1543	2012-04-07 14:35:00	Győr-Moson-Sopron	47.562361 17.57411	83 59+380	serious injury	wet	rainy	collosing opposite direction
1544	2012-04-07 18:20:00	Győr-Moson-Sopron	47.477266 17.158843	86 127+800	serious injury	wet	overcast	track leaving, with solid object collision
1545	2012-04-08 10:38:00	Heves	47.949498 20.090277	94000	serious injury	normal	overcast	collision in same direction
1546	2012-04-10 02:00:00	Győr-Moson-Sopron	47.505 16.783444	8627-09-30 20:10:00	serious injury	normal	sunny	collision with animals
1547	2012-04-10 06:05:00	Heves	47.648972 20.133333	3205 19+190	fatal	normal	sunny	collision in same direction
1548	2012-04-11 05:20:00	Győr-Moson-Sopron	47.673777 17.62986	94000	light injury	normal	sunny	collision in crossing direction
1549	2012-04-11 09:51:00	Győr-Moson-Sopron	47.679833 17.638333	94000	light injury	normal	sunny	collision in crossing direction
1550	2012-04-11 15:07:00	Heves	47.763555 20.444	3 127+600	light injury	normal	sunny	collision with turning
1551	2012-04-11 16:20:00	Győr-Moson-Sopron	47.692064 16.581881	94000	light injury	normal	sunny	pedestrian
1552	2012-04-11 20:30:00	Győr-Moson-Sopron	47.666278 17.627971	94000	light injury	normal	sunny	slipping, carving, overturning on the road
1553	2012-04-12 05:55:00	Győr-Moson-Sopron	47.677918 16.591667	86107 2+184	serious injury	wet	rainy	pedestrian
1554	2012-04-12 11:35:00	Heves	47.698444 20.262	3207-04-01 00:40:00	light injury	wet	overcast	track leaving, with solid object collision
1555	2012-04-12 14:05:00	Győr-Moson-Sopron	47.882804 17.263489	94000	light injury	wet	overcast	collision in same direction
1556	2012-04-13 05:50:00	Győr-Moson-Sopron	47.618799 16.829122	94000	serious injury	normal	sunny	collision in crossing direction
1557	2012-04-13 16:00:00	Győr-Moson-Sopron	47.485333 16.737666	8627 17+420	light injury	normal	sunny	track leaving, without solid object collision
1558	2012-04-13 23:45:00	Győr-Moson-Sopron	47.68839 16.587278	94000	light injury	normal	sunny	collision in crossing direction
1559	2012-04-14 09:30:00	Győr-Moson-Sopron	47.627003 17.252208	86 152+600	light injury	normal	overcast	collision with turning
1560	2012-04-14 11:15:00	Győr-Moson-Sopron	47.467011 16.812268	94000	light injury	not a road	overcast	slipping, carving, overturning on the road
1561	2012-04-14 20:30:00	Heves	47.771282 19.850173	94000	fatal	normal	sunny	track leaving, with solid object collision
1562	2012-04-14 21:07:00	Győr-Moson-Sopron	47.694444 17.657416	94000	light injury	normal	sunny	pedestrian
1563	2012-04-15 15:22:00	Heves	47.854193 20.217805	2416 26+000	fatal	normal	overcast	track leaving, with solid object collision
1564	2012-04-15 17:40:00	Győr-Moson-Sopron	47.66675 17.627583	94000	serious injury	normal	sunny	collision in same direction
1565	2012-04-16 10:47:00	Győr-Moson-Sopron	47.680251 16.609223	94000	light injury	normal	overcast	collision in crossing direction
1566	2012-04-16 11:50:00	Heves	47.984608 20.450771	2505-07-31 18:00:00	light injury	normal	overcast	track leaving, without solid object collision
1567	2012-04-16 18:00:00	Heves	47.706972 19.630361	2111-06-30 23:10:00	light injury	normal	sunny	collision in crossing direction
1568	2012-04-17 16:50:00	Győr-Moson-Sopron	47.878666 17.273666	94000	light injury	normal	sunny	collision with turning
1569	2012-04-17 19:28:00	Győr-Moson-Sopron	47.631335 17.767338	81 72+466	serious injury	normal	sunny	track leaving, without solid object collision
1570	2012-04-18 09:05:00	Győr-Moson-Sopron	47.878971 17.274444	94000	light injury	normal	sunny	collision in crossing direction
1571	2012-04-18 17:00:00	Győr-Moson-Sopron	47.686611 17.639749	94000	light injury	normal	sunny	collision with turning
1572	2012-04-19 06:20:00	Győr-Moson-Sopron	47.89261 17.223861	1 167+500	serious injury	normal	sunny	track leaving, without solid object collision
1573	2012-04-19 14:27:00	Győr-Moson-Sopron	47.634389 17.669944	82 69+553	light injury	normal	sunny	collision in crossing direction
1574	2012-04-19 14:48:00	Győr-Moson-Sopron	47.68375 17.646916	94000	light injury	normal	sunny	collision in crossing direction
1575	2012-04-19 16:30:00	Győr-Moson-Sopron	47.686 17.638222	94000	light injury	normal	sunny	collision with stopped vehicle
1576	2012-04-19 18:10:00	Győr-Moson-Sopron	47.618098 16.87461	8531 0+000	serious injury	normal	sunny	collision in crossing direction
1577	2012-04-20 07:58:00	Győr-Moson-Sopron	47.682506 16.574865	94000	serious injury	normal	sunny	collision in crossing direction
1578	2012-04-20 16:39:00	Győr-Moson-Sopron	47.769833 17.541388	94000	light injury	normal	sunny	collision in crossing direction
1579	2012-04-20 19:30:00	Heves	47.914526 20.376555	94000	light injury	normal	sunny	collision with turning
1580	2012-04-21 04:00:00	Heves	47.685833 20.315195	3208-09-30 21:37:00	light injury	normal	overcast	slipping, carving, overturning on the road
1581	2012-04-21 07:35:00	Győr-Moson-Sopron	47.703361 17.69011	94000	light injury	normal	sunny	track leaving, with solid object collision
1582	2012-04-21 08:35:00	Győr-Moson-Sopron	47.708805 17.631305	94000	serious injury	normal	sunny	collision in crossing direction
1583	2012-04-21 13:20:00	Győr-Moson-Sopron	47.57 17.241916	86 145+350	light injury	normal	sunny	collision with turning
1584	2012-04-21 16:40:00	Győr-Moson-Sopron	47.626805 17.492221	94000	serious injury	normal	sunny	track leaving, without solid object collision
1585	2012-04-23 20:05:00	Heves	47.817141 19.95966	24 5+400	serious injury	normal	overcast	track leaving, with solid object collision
1586	2012-04-24 05:10:00	Heves	47.899051 20.373922	94000	serious injury	not a road	overcast	slipping, carving, overturning on the road
1587	2012-04-24 14:50:00	Heves	47.728132 20.352982	M3 108+800	light injury	normal	sunny	collision with turning
1588	2012-04-24 17:05:00	Heves	47.857999 20.368972	25 8+861	serious injury	normal	overcast	track leaving, without solid object collision
1589	2012-04-24 19:45:00	Győr-Moson-Sopron	47.637277 16.601281	94000	light injury	normal	sunny	track leaving, with solid object collision
1590	2012-04-25 06:05:00	Győr-Moson-Sopron	47.691946 16.568445	94000	serious injury	normal	sunny	collision in crossing direction
1591	2012-04-25 06:25:00	Heves	47.940437 20.285656	2413 0+900	fatal	wet	rainy	collision with stopped vehicle
1592	2012-04-25 07:28:00	Győr-Moson-Sopron	47.680305 17.638222	94000	serious injury	normal	sunny	pedestrian
1593	2012-04-25 14:05:00	Heves	47.745944 19.674972	94000	light injury	normal	sunny	track leaving, with solid object collision
1594	2012-04-27 07:15:00	Győr-Moson-Sopron	47.725222 17.661277	1301 3+539	light injury	normal	sunny	collision in crossing direction
1595	2012-04-27 07:35:00	Győr-Moson-Sopron	47.680306 16.580056	94000	light injury	normal	sunny	collision with turning
1596	2012-04-27 09:15:00	Győr-Moson-Sopron	47.608806 17.738444	8222-07-01	light injury	normal	sunny	collision with turning
1597	2012-04-28 10:05:00	Heves	47.5935 20.28025	94000	serious injury	normal	sunny	collision with turning
1598	2012-04-28 11:30:00	Heves	48.054498 20.095916	2305-03-31 22:59:00	light injury	normal	sunny	collision with animals
1599	2012-04-28 13:15:00	Győr-Moson-Sopron	47.855766 17.268577	94000	light injury	normal	sunny	collision in crossing direction
1600	2012-04-28 18:40:00	Heves	47.703065 20.427562	33 7+563	serious injury	normal	sunny	collision in same direction
1601	2012-04-28 19:25:00	Heves	47.666166 19.702778	3 59+951	serious injury	normal	sunny	collision in same direction
1602	2012-04-29 03:15:00	Győr-Moson-Sopron	45.037146 10.787483	94000	light injury	normal	sunny	track leaving, with solid object collision
1603	2012-04-29 17:00:00	Győr-Moson-Sopron	47.708361 17.484527	M1 135+950	serious injury	normal	sunny	collision in same direction
1604	2012-04-29 17:20:00	Heves	47.528083 20.382445	94000	light injury	normal	sunny	collision with turning
1605	2012-04-29 21:30:00	Heves	47.815193 20.053055	2416-08-31 22:05:00	serious injury	normal	sunny	track leaving, with solid object collision
1606	2012-04-30 07:58:00	Győr-Moson-Sopron	47.513694 16.799305	8627-10-31 21:00:00	light injury	normal	sunny	collision with turning
1607	2012-04-30 15:05:00	Heves	47.651444 20.154667	3204 23+197	serious injury	normal	sunny	collosing opposite direction
1608	2012-04-30 16:30:00	Győr-Moson-Sopron	47.591388 17.040777	85 42+060	serious injury	normal	sunny	collision with turning
1609	2012-04-30 17:20:00	Győr-Moson-Sopron	47.867388 17.270028	94000	serious injury	normal	sunny	collision in crossing direction
1610	2012-04-30 21:15:00	Heves	47.661919 20.581684	33 20+387	light injury	normal	sunny	track leaving, without solid object collision
1611	2012-05-01 11:30:00	Győr-Moson-Sopron	47.586833 16.977916	85 47+339	light injury	normal	sunny	collision in crossing direction
1612	2012-05-01 17:13:00	Győr-Moson-Sopron	47.670583 17.634749	94000	light injury	normal	sunny	track leaving, with solid object collision
1613	2012-05-02 08:41:00	Győr-Moson-Sopron	47.658444 17.655471	94000	serious injury	normal	sunny	other
1614	2012-05-02 12:45:00	Heves	47.932432 20.193158	2412 0+300	light injury	not a road	sunny	collision in crossing direction
1615	2012-05-02 14:35:00	Heves	47.793055 19.913555	24137 0+300	light injury	normal	sunny	pedestrian
1616	2012-05-02 21:05:00	Győr-Moson-Sopron	47.676972 17.657833	94000	light injury	normal	sunny	collision with turning
1617	2012-05-03 05:20:00	Győr-Moson-Sopron	47.698833 17.67911	94000	light injury	wet	rainy	collision with turning
1618	2012-05-03 12:10:00	Győr-Moson-Sopron	47.656555 17.634221	83 71+800	light injury	wet	overcast	collision in same direction
1619	2012-05-03 13:35:00	Heves	47.644694 20.336	31 118+400	light injury	normal	sunny	track leaving, with solid object collision
1620	2012-05-03 13:42:00	Győr-Moson-Sopron	47.687418 16.548862	86108 1+368	light injury	normal	overcast	collision in crossing direction
1621	2012-05-03 15:30:00	Győr-Moson-Sopron	47.459694 17.144166	8427-03-01 01:00:00	light injury	normal	sunny	track leaving, with solid object collision
1622	2012-05-03 16:50:00	Győr-Moson-Sopron	47.739517 16.546715	84 128+300	light injury	normal	sunny	collision with turning
1623	2012-05-03 17:58:00	Győr-Moson-Sopron	47.692652 16.580421	94000	light injury	normal	sunny	collision in crossing direction
1624	2012-05-04 05:30:00	Heves	47.693194 19.964722	32103 3+130	light injury	wet	overcast	collosing opposite direction
1625	2012-05-04 15:35:00	Győr-Moson-Sopron	47.595527 17.587114	83 63+377	light injury	wet	overcast	collosing opposite direction
1626	2012-05-05 08:35:00	Győr-Moson-Sopron	47.711139 17.676472	1 121+626	light injury	other	sunny	collision in crossing direction
1627	2012-05-05 10:05:00	Győr-Moson-Sopron	47.640259 16.644438	84 113+100	light injury	normal	sunny	collision in same direction
1628	2012-05-05 10:20:00	Győr-Moson-Sopron	47.588167 17.69211	82 64+150	light injury	normal	sunny	collision with turning
1629	2012-05-05 12:25:00	Győr-Moson-Sopron	47.678528 17.66086	81 811+539	serious injury	normal	sunny	collision with turning
1630	2012-05-05 12:35:00	Heves	47.932021 20.194426	24 0+004	light injury	normal	sunny	track leaving, without solid object collision
1631	2012-05-05 18:00:00	Győr-Moson-Sopron	47.5765 17.691305	94000	light injury	normal	sunny	collision in crossing direction
1632	2012-05-06 01:00:00	Győr-Moson-Sopron	47.586949 17.677548	94000	serious injury	normal	sunny	pedestrian
1633	2012-05-06 17:08:00	Heves	47.804861 19.767472	2402 11+969	light injury	normal	sunny	track leaving, with solid object collision
1634	2012-05-06 17:47:00	Győr-Moson-Sopron	47.674028 17.812222	81139 1+765	serious injury	normal	sunny	track leaving, without solid object collision
1635	2012-05-06 19:10:00	Győr-Moson-Sopron	47.654125 16.489207	86107 9+668	serious injury	normal	sunny	track leaving, without solid object collision
1636	2012-05-07 06:35:00	Győr-Moson-Sopron	47.607695 16.697954	84 109+988	light injury	wet	overcast	collision in crossing direction
1637	2012-05-07 11:00:00	Győr-Moson-Sopron	47.662723 16.557139	94000	serious injury	normal	overcast	pedestrian
1638	2012-05-07 11:55:00	Heves	47.773536 19.923536	3 80+955	light injury	wet	overcast	pedestrian
1639	2012-05-07 23:12:00	Győr-Moson-Sopron	47.668722 17.65386	94000	light injury	normal	sunny	collision in crossing direction
1640	2012-05-08 12:30:00	Győr-Moson-Sopron	47.631472 17.766916	81 72+500	fatal	normal	sunny	collosing opposite direction
1641	2012-05-08 13:00:00	Heves	47.751046 20.414248	33101 1+350	serious injury	normal	sunny	pedestrian
1642	2012-05-08 17:24:00	Győr-Moson-Sopron	47.679729 17.636139	94000	serious injury	normal	sunny	collision in crossing direction
1643	2012-05-10 05:05:00	Győr-Moson-Sopron	47.514 17.52936	8307 0+650	fatal	normal	sunny	collision in crossing direction
1644	2012-05-10 05:40:00	Heves	47.919319 20.328442	24 57+616	serious injury	normal	sunny	track leaving, without solid object collision
1645	2012-05-10 15:50:00	Győr-Moson-Sopron	47.882242 17.27072	94000	serious injury	normal	sunny	collision with turning
1646	2012-05-10 17:45:00	Győr-Moson-Sopron	47.474416 17.166972	86 130+223	serious injury	normal	sunny	track leaving, with solid object collision
1647	2012-05-11 08:00:00	Győr-Moson-Sopron	47.689307 16.577778	94000	light injury	normal	sunny	pedestrian
1648	2012-05-11 09:30:00	Győr-Moson-Sopron	47.681612 16.592695	94000	light injury	normal	sunny	collision in same direction
1649	2012-05-11 09:45:00	Heves	47.763655 19.702418	94000	serious injury	normal	sunny	pedestrian
1650	2012-05-11 11:15:00	Győr-Moson-Sopron	47.684251 16.574278	94000	light injury	normal	sunny	collision in same direction
1651	2012-05-11 11:20:00	Győr-Moson-Sopron	47.689918 16.584112	94000	serious injury	normal	sunny	pedestrian
1652	2012-05-11 13:48:00	Heves	47.847776 20.329194	24129 6+200	light injury	normal	sunny	track leaving, without solid object collision
1653	2012-05-11 15:20:00	Győr-Moson-Sopron	47.73026 17.425809	94000	serious injury	normal	sunny	collision in crossing direction
1654	2012-05-11 17:20:00	Győr-Moson-Sopron	47.739529 16.546723	84 128+300	serious injury	normal	sunny	collision with turning
1655	2012-05-11 17:45:00	Heves	47.774775 19.933659	3 81+765	light injury	normal	sunny	collision with turning
1656	2012-05-11 18:32:00	Győr-Moson-Sopron	47.665611 17.627999	94000	light injury	normal	sunny	collision in same direction
1657	2012-05-11 22:36:00	Győr-Moson-Sopron	45.037146 10.787483	94000	light injury	normal	sunny	track leaving, without solid object collision
1658	2012-05-12 10:30:00	Győr-Moson-Sopron	47.860486 17.275144	94000	serious injury	not a road	sunny	collision in crossing direction
1659	2012-05-12 14:20:00	Győr-Moson-Sopron	47.654222 17.658416	82 71+1198	serious injury	normal	overcast	collision in crossing direction
1660	2012-05-13 04:50:00	Győr-Moson-Sopron	47.589138 16.874361	85 55+450	serious injury	normal	overcast	pedestrian
1661	2012-05-13 16:34:00	Győr-Moson-Sopron	47.44164 17.792888	8302 29+936	serious injury	normal	sunny	collision in crossing direction
1662	2012-05-14 00:25:00	Győr-Moson-Sopron	47.744694 17.576972	94000	serious injury	normal	overcast	track leaving, with solid object collision
1663	2012-05-14 14:50:00	Heves	47.89986 20.37675	94000	light injury	normal	overcast	collosing opposite direction
1664	2012-05-15 08:25:00	Győr-Moson-Sopron	47.866155 17.255616	94000	serious injury	normal	sunny	collosing opposite direction
1665	2012-05-16 09:30:00	Győr-Moson-Sopron	47.718527 17.637527	94000	serious injury	normal	sunny	track leaving, with solid object collision
1666	2012-05-16 16:30:00	Győr-Moson-Sopron	47.429444 16.712916	8614 35+180	light injury	normal	overcast	collision in crossing direction
1667	2012-05-16 19:15:00	Győr-Moson-Sopron	47.684444 17.630749	94000	light injury	normal	sunny	collision in crossing direction
1668	2012-05-16 22:10:00	Heves	47.914821 20.481433	2509-11-30 16:00:00	fatal	wet	overcast	track leaving, with solid object collision
1669	2012-05-17 08:55:00	Győr-Moson-Sopron	47.68275 17.642777	94000	light injury	normal	sunny	collision in same direction
1670	2012-05-17 10:30:00	Győr-Moson-Sopron	47.681584 16.59275	94000	light injury	normal	sunny	pedestrian
1671	2012-05-17 14:40:00	Heves	47.914526 20.369916	25 16+478	light injury	normal	overcast	slipping, carving, overturning on the road
1672	2012-05-17 18:05:00	Győr-Moson-Sopron	47.858777 17.319639	1406 3+500	serious injury	normal	sunny	collision in crossing direction
1673	2012-05-18 07:51:00	Győr-Moson-Sopron	47.694555 17.721944	94000	light injury	normal	sunny	collision with turning
1674	2012-05-18 07:58:00	Győr-Moson-Sopron	47.879798 17.271483	94000	serious injury	normal	sunny	pedestrian
1675	2012-05-18 08:05:00	Győr-Moson-Sopron	47.692057 16.581889	94000	light injury	normal	sunny	pedestrian
1676	2012-05-18 12:49:00	Győr-Moson-Sopron	47.665388 17.417721	8417 0+400	fatal	normal	sunny	track leaving, without solid object collision
1677	2012-05-18 16:20:00	Heves	47.682 19.665528	21 2+071	light injury	normal	sunny	collision in crossing direction
1678	2012-05-18 17:37:00	Győr-Moson-Sopron	47.68575 17.63736	94000	light injury	normal	sunny	collision in crossing direction
1679	2012-05-18 21:30:00	Győr-Moson-Sopron	47.599388 17.024333	8529 0+700	serious injury	normal	sunny	collision in crossing direction
1680	2012-05-19 10:16:00	Győr-Moson-Sopron	47.690972 17.640944	94000	light injury	normal	sunny	pedestrian
1681	2012-05-19 11:05:00	Győr-Moson-Sopron	47.673918 16.582112	94000	light injury	normal	sunny	track leaving, without solid object collision
1682	2012-05-19 11:35:00	Heves	47.883887 20.331416	2416 39+400	serious injury	normal	sunny	slipping, carving, overturning on the road
1683	2012-05-19 14:15:00	Győr-Moson-Sopron	47.695751 16.554528	94000	serious injury	normal	sunny	collosing opposite direction
1684	2012-05-19 15:14:00	Győr-Moson-Sopron	47.570653 17.879307	8224-08-31 16:14:00	light injury	normal	sunny	collision in crossing direction
1685	2012-05-19 16:55:00	Heves	47.67275 19.935778	3203-12-01	light injury	normal	sunny	collosing opposite direction
1686	2012-05-20 13:55:00	Győr-Moson-Sopron	47.673779 16.604056	86107 1+300	light injury	normal	sunny	collision with turning
1687	2012-05-20 14:40:00	Heves	47.765579 20.032284	3 89+300	light injury	normal	sunny	collision with turning
1688	2012-05-20 21:25:00	Győr-Moson-Sopron	47.555778 17.478194	8418-05-31 16:10:00	light injury	normal	sunny	track leaving, without solid object collision
1689	2012-05-20 22:00:00	Heves	48.083498 20.247583	25105 0+1518	light injury	normal	sunny	track leaving, without solid object collision
1690	2012-05-21 11:35:00	Győr-Moson-Sopron	47.582888 16.981388	94000	serious injury	normal	sunny	collision of train and vehicle
1691	2012-05-21 15:25:00	Heves	47.805854 19.950904	24 3+950	light injury	normal	sunny	track leaving, without solid object collision
1692	2012-05-21 15:30:00	Heves	48.031415 20.478416	2505 15+397	light injury	normal	sunny	track leaving, without solid object collision
1693	2012-05-22 06:00:00	Győr-Moson-Sopron	47.850999 17.24675	86 184+050	light injury	wet	overcast	collision in same direction
1694	2012-05-22 13:00:00	Győr-Moson-Sopron	47.8119 17.204022	94000	light injury	wet	rainy	collision in crossing direction
1695	2012-05-22 13:40:00	Heves	47.911971 20.37275	94000	serious injury	normal	sunny	collosing opposite direction
1696	2012-05-22 13:51:00	Győr-Moson-Sopron	47.460964 16.812456	8623-05-31 21:00:00	serious injury	wet	rainy	collision with turning
1697	2012-05-22 16:08:00	Győr-Moson-Sopron	47.679639 17.640527	94000	light injury	wet	rainy	collision with stopped vehicle
1698	2012-05-22 18:30:00	Győr-Moson-Sopron	47.585541 16.770615	85 65+400	light injury	wet	rainy	track leaving, without solid object collision
1699	2012-05-22 18:35:00	Győr-Moson-Sopron	47.560638 17.190249	94000	light injury	wet	overcast	collision in crossing direction
1700	2012-05-22 19:00:00	Győr-Moson-Sopron	47.614711 16.88881	8519-01-31 16:00:00	light injury	wet	rainy	track leaving, without solid object collision
1701	2012-05-22 19:00:00	Győr-Moson-Sopron	47.682333 17.643083	94000	light injury	wet	rainy	collision in same direction
1702	2012-05-23 07:55:00	Heves	47.668611 19.674389	94000	light injury	normal	sunny	collision in crossing direction
1703	2012-05-23 14:00:00	Győr-Moson-Sopron	47.68164 16.592917	94000	light injury	wet	stormy	pedestrian
1704	2012-05-23 15:50:00	Győr-Moson-Sopron	47.674899 17.672476	94000	light injury	normal	sunny	collision with turning
1705	2012-05-23 18:30:00	Heves	47.972026 20.345611	25 23+400	light injury	wet	overcast	collosing opposite direction
1706	2012-05-24 09:55:00	Győr-Moson-Sopron	47.6835 17.647083	94000	light injury	normal	sunny	collision in same direction
1707	2012-05-24 13:20:00	Győr-Moson-Sopron	47.600583 17.243555	94000	fatal	normal	sunny	pedestrian
1708	2012-05-24 16:55:00	Győr-Moson-Sopron	47.690418 16.577278	94000	serious injury	normal	sunny	collision with turning
1709	2012-05-25 08:40:00	Heves	47.602389 19.694756	31121 5+323	serious injury	normal	sunny	collision with turning
1710	2012-05-25 16:33:00	Győr-Moson-Sopron	47.66675 17.644388	94000	serious injury	normal	sunny	collision with turning
1711	2012-05-25 20:00:00	Győr-Moson-Sopron	47.993666 17.198306	94000	serious injury	normal	sunny	collosing opposite direction
1712	2012-05-26 12:30:00	Győr-Moson-Sopron	47.603306 17.652721	94000	light injury	normal	sunny	collision in crossing direction
1713	2012-05-26 18:57:00	Heves	47.685444 19.943	32103 1+300	serious injury	normal	sunny	collosing opposite direction
1714	2012-05-27 00:35:00	Győr-Moson-Sopron	47.860721 17.275028	94000	light injury	normal	sunny	track leaving, without solid object collision
1715	2012-05-28 08:40:00	Győr-Moson-Sopron	47.665166 17.658388	94000	light injury	normal	sunny	collision with stopped vehicle
1716	2012-05-28 16:25:00	Győr-Moson-Sopron	47.661752 16.482945	94000	serious injury	wet	rainy	collosing opposite direction
1717	2012-05-28 16:55:00	Heves	47.790882 19.927627	24136 0+600	light injury	other	sunny	track leaving, without solid object collision
1718	2012-05-28 19:05:00	Heves	47.747888 19.679361	2401-09-30 21:44:00	light injury	normal	sunny	collision in same direction
1719	2012-05-29 15:02:00	Győr-Moson-Sopron	47.674028 17.643555	94000	light injury	normal	sunny	collision in crossing direction
1720	2012-05-30 14:54:00	Győr-Moson-Sopron	47.942938 17.229606	150 8+850	light injury	wet	stormy	collision with turning
1721	2012-05-30 20:25:00	Heves	48.037692 20.337277	94000	light injury	normal	sunny	track leaving, without solid object collision
1722	2012-05-31 09:30:00	Győr-Moson-Sopron	47.553639 17.578277	94000	fatal	normal	sunny	collision in crossing direction
1723	2012-05-31 15:30:00	Győr-Moson-Sopron	47.688474 16.526334	94000	light injury	normal	sunny	collision with turning
1724	2012-05-31 17:17:00	Győr-Moson-Sopron	47.686777 17.627027	94000	light injury	normal	sunny	collision in crossing direction
1725	2012-05-31 17:25:00	Győr-Moson-Sopron	47.687833 17.644083	94000	light injury	normal	overcast	collision with turning
1726	2012-05-31 19:30:00	Heves	47.908026 20.358277	94000	light injury	normal	sunny	track leaving, with solid object collision
1727	2012-06-01 07:05:00	Győr-Moson-Sopron	47.683691 17.692618	94000	serious injury	wet	rainy	collosing opposite direction
1728	2012-06-01 10:00:00	Heves	48.030331 20.329499	2506-03-31 17:50:00	light injury	wet	overcast	collision in crossing direction
1729	2012-06-01 12:35:00	Győr-Moson-Sopron	47.687215 16.589311	94000	light injury	normal	overcast	collision with stopped vehicle
1730	2012-06-02 16:00:00	Győr-Moson-Sopron	47.684083 17.661305	94000	serious injury	not a road	sunny	slipping, carving, overturning on the road
1731	2012-06-03 00:15:00	Győr-Moson-Sopron	47.606278 17.526888	94000	serious injury	normal	sunny	track leaving, without solid object collision
1732	2012-06-03 13:50:00	Győr-Moson-Sopron	47.597361 17.529138	94000	light injury	normal	sunny	collision in crossing direction
1733	2012-06-04 03:57:00	Győr-Moson-Sopron	47.682611 17.628444	94000	light injury	normal	sunny	collision with stopped vehicle
1734	2012-06-04 05:00:00	Győr-Moson-Sopron	47.601722 16.736722	85 66+350	light injury	normal	overcast	track leaving, with solid object collision
1735	2012-06-04 07:45:00	Heves	47.766438 19.922052	94000	light injury	normal	sunny	collision with turning
1736	2012-06-04 08:05:00	Győr-Moson-Sopron	47.685375 16.563836	86107 4+670	light injury	normal	overcast	collision in crossing direction
1737	2012-06-04 12:20:00	Heves	47.665917 19.617145	M3 50+450	serious injury	normal	sunny	track leaving, without solid object collision
1738	2012-06-04 18:15:00	Győr-Moson-Sopron	47.596833 16.814389	85 60+150	light injury	wet	overcast	track leaving, without solid object collision
1739	2012-06-05 14:00:00	Heves	47.78215 19.929726	24 0+801	light injury	normal	sunny	pedestrian
1740	2012-06-05 21:15:00	Győr-Moson-Sopron	47.707833 17.634138	14 2+350	light injury	normal	overcast	collision with turning
1741	2012-06-06 12:30:00	Győr-Moson-Sopron	47.714779 16.613667	8527-03-01 01:00:00	light injury	normal	sunny	track leaving, with solid object collision
1742	2012-06-06 13:30:00	Győr-Moson-Sopron	47.527667 17.490027	94000	light injury	normal	sunny	collision in same direction
1743	2012-06-06 13:30:00	Heves	47.926832 20.024639	24118 0+360	light injury	normal	sunny	track leaving, without solid object collision
1744	2012-06-06 16:40:00	Győr-Moson-Sopron	47.685694 17.640166	1 125+650	light injury	normal	sunny	collision in same direction
1745	2012-06-06 17:00:00	Győr-Moson-Sopron	47.759111 17.644055	94000	light injury	normal	sunny	slipping, carving, overturning on the road
1746	2012-06-06 18:55:00	Győr-Moson-Sopron	47.654125 16.489207	86107 8+000	serious injury	normal	sunny	track leaving, without solid object collision
1747	2012-06-06 21:25:00	Heves	48.055137 20.164805	23 30+106	light injury	normal	sunny	pedestrian
1748	2012-06-07 14:58:00	Győr-Moson-Sopron	47.508571 16.77733	84 95+541	light injury	normal	sunny	collision in crossing direction
1749	2012-06-07 16:15:00	Győr-Moson-Sopron	45.037146 10.787483	94000	serious injury	normal	sunny	collision with turning
1750	2012-06-07 19:28:00	Győr-Moson-Sopron	47.649916 17.626666	94000	light injury	normal	sunny	collision in crossing direction
1751	2012-06-07 21:50:00	Győr-Moson-Sopron	47.868431 17.269628	1 0+159	fatal	normal	sunny	collision in crossing direction
1752	2012-06-08 08:50:00	Győr-Moson-Sopron	47.610305 17.240583	85 26+973	light injury	normal	sunny	collision in crossing direction
1753	2012-06-08 12:30:00	Győr-Moson-Sopron	47.548769 17.751677	94000	light injury	normal	sunny	collision in crossing direction
1754	2012-06-08 14:40:00	Heves	47.6165 20.358722	32113 2+995	light injury	normal	sunny	track leaving, with solid object collision
1755	2012-06-08 19:35:00	Győr-Moson-Sopron	47.666444 17.734388	8136 48+100	serious injury	normal	sunny	slipping, carving, overturning on the road
1756	2012-06-09 08:20:00	Győr-Moson-Sopron	47.593638 17.030111	94000	light injury	normal	sunny	slipping, carving, overturning on the road
1757	2012-06-09 11:30:00	Győr-Moson-Sopron	47.683539 17.634169	94000	light injury	normal	sunny	collision in same direction
1758	2012-06-09 11:30:00	Győr-Moson-Sopron	47.616195 17.727638	8222 6+770	serious injury	normal	sunny	track leaving, without solid object collision
1759	2012-06-09 12:20:00	Győr-Moson-Sopron	47.539611 17.645249	94000	light injury	normal	sunny	track leaving, with solid object collision
1760	2012-06-09 15:25:00	Győr-Moson-Sopron	47.685442 16.563811	86107 4+670	serious injury	wet	rainy	collision in crossing direction
1761	2012-06-09 16:15:00	Heves	47.83986 19.956528	24 9+484	serious injury	normal	sunny	collision with turning
1762	2012-06-09 17:50:00	Győr-Moson-Sopron	47.724362 16.637084	94000	serious injury	wet	rainy	collosing opposite direction
1763	2012-06-09 21:21:00	Heves	47.705375 20.428757	94000	light injury	wet	rainy	track leaving, without solid object collision
1764	2012-06-10 00:35:00	Győr-Moson-Sopron	47.65375 17.631555	83 71+400	light injury	wet	rainy	track leaving, without solid object collision
1765	2012-06-10 21:00:00	Heves	47.763718 19.702456	94000	light injury	normal	overcast	track leaving, without solid object collision
1766	2012-06-11 07:40:00	Győr-Moson-Sopron	47.667639 17.656416	94000	serious injury	wet	overcast	collosing opposite direction
1767	2012-06-11 09:35:00	Győr-Moson-Sopron	47.598998 16.759091	85 64+070	light injury	wet	rainy	collision with turning
1768	2012-06-11 14:02:00	Győr-Moson-Sopron	47.687279 16.550612	86108 1+605	light injury	normal	sunny	collision in crossing direction
1769	2012-06-11 18:30:00	Győr-Moson-Sopron	47.683666 17.25261	94000	light injury	normal	sunny	collision in crossing direction
1770	2012-06-11 19:20:00	Győr-Moson-Sopron	47.703222 17.69036	94000	light injury	normal	sunny	collosing opposite direction
1771	2012-06-12 07:40:00	Heves	47.905693 20.381111	94000	light injury	normal	overcast	pedestrian
1772	2012-06-12 12:52:00	Győr-Moson-Sopron	47.707444 17.487194	M1 135+165	light injury	normal	overcast	track leaving, without solid object collision
1773	2012-06-12 16:35:00	Győr-Moson-Sopron	47.67389 17.661827	94000	light injury	normal	overcast	collision in same direction
1774	2012-06-12 17:38:00	Heves	47.859257 20.370975	25 9+050	light injury	normal	sunny	track leaving, without solid object collision
1775	2012-06-13 07:17:00	Győr-Moson-Sopron	47.595728 16.782407	85 62+250	fatal	wet	rainy	collosing opposite direction
1776	2012-06-13 13:10:00	Győr-Moson-Sopron	47.572367 17.579659	83 60+700	serious injury	normal	sunny	collision in same direction
1777	2012-06-13 14:30:00	Győr-Moson-Sopron	47.684723 16.599945	94000	serious injury	wet	rainy	pedestrian
1778	2012-06-13 20:00:00	Győr-Moson-Sopron	47.696584 16.581084	94000	light injury	normal	sunny	collision with turning
1779	2012-06-13 22:50:00	Heves	47.817054 19.989333	2419-02-01 00:08:00	light injury	normal	sunny	track leaving, without solid object collision
1780	2012-06-14 15:16:00	Győr-Moson-Sopron	47.459555 17.103083	86 124+600	serious injury	normal	sunny	track leaving, with solid object collision
1781	2012-06-14 18:00:00	Heves	47.846085 20.226489	2416 27+200	light injury	normal	sunny	collision with turning
1782	2012-06-14 20:40:00	Heves	47.693687 20.440405	33 9+170	light injury	normal	sunny	track leaving, with solid object collision
1783	2012-06-15 00:40:00	Heves	47.757467 20.251163	3208 0+135	light injury	normal	sunny	track leaving, with solid object collision
1784	2012-06-15 11:00:00	Győr-Moson-Sopron	47.671055 17.680471	94000	light injury	normal	sunny	collision with turning
1785	2012-06-15 11:30:00	Győr-Moson-Sopron	47.685666 17.693833	94000	light injury	normal	sunny	collision in crossing direction
1786	2012-06-15 11:50:00	Heves	47.909443 20.379833	94000	light injury	normal	sunny	collision with turning
1787	2012-06-15 19:50:00	Győr-Moson-Sopron	47.824138 17.326861	1 0+159	fatal	normal	sunny	pedestrian
1788	2012-06-16 01:00:00	Győr-Moson-Sopron	47.588555 17.193277	8602-12-31 16:00:00	fatal	normal	sunny	track leaving, without solid object collision
1789	2012-06-16 11:25:00	Heves	47.706465 20.102023	M3 88+400	serious injury	normal	sunny	track leaving, without solid object collision
1790	2012-06-16 13:02:00	Győr-Moson-Sopron	47.878694 17.265694	94000	light injury	normal	sunny	collision in crossing direction
1791	2012-06-16 18:20:00	Győr-Moson-Sopron	47.617944 17.603944	94000	light injury	normal	sunny	collision with turning
1792	2012-06-17 00:05:00	Győr-Moson-Sopron	47.682506 16.574865	86107 3+425	light injury	normal	sunny	not driver accident
1793	2012-06-17 02:15:00	Győr-Moson-Sopron	47.588527 16.861305	85 56+500	light injury	normal	sunny	collision in crossing direction
1794	2012-06-17 03:50:00	Győr-Moson-Sopron	47.474333 17.097166	94000	serious injury	normal	sunny	track leaving, with solid object collision
1795	2012-06-17 05:35:00	Heves	48.019211 20.095625	23 22+850	serious injury	normal	sunny	collosing opposite direction
1796	2012-06-17 08:11:00	Győr-Moson-Sopron	47.682611 17.634833	94000	light injury	normal	sunny	collosing opposite direction
1797	2012-06-17 08:15:00	Győr-Moson-Sopron	47.503182 16.780719	84 93+750	light injury	normal	sunny	track leaving, without solid object collision
1798	2012-06-17 10:05:00	Győr-Moson-Sopron	47.688777 17.644388	81 83+900	serious injury	normal	sunny	collision in crossing direction
1799	2012-06-17 10:25:00	Győr-Moson-Sopron	47.663917 17.749472	94000	serious injury	normal	sunny	collision in crossing direction
1800	2012-06-17 17:45:00	Győr-Moson-Sopron	47.523389 17.315027	8419 15+400	serious injury	normal	sunny	slipping, carving, overturning on the road
1801	2012-06-17 18:35:00	Győr-Moson-Sopron	47.670956 17.654248	94000	light injury	normal	sunny	collision in crossing direction
1802	2012-06-18 07:40:00	Győr-Moson-Sopron	47.454781 16.772473	8623-08-31 17:43:00	fatal	normal	sunny	collision in crossing direction
1803	2012-06-18 20:15:00	Heves	47.599666 20.26825	94000	light injury	normal	sunny	collision in crossing direction
1804	2012-06-18 20:40:00	Győr-Moson-Sopron	47.604173 17.911042	94000	fatal	normal	sunny	track leaving, with solid object collision
1805	2012-06-18 23:50:00	Heves	47.90044 20.381604	94000	serious injury	normal	sunny	slipping, carving, overturning on the road
1806	2012-06-19 08:20:00	Győr-Moson-Sopron	47.674535 16.601053	86107 1+400	light injury	normal	sunny	collision in same direction
1807	2012-06-19 08:48:00	Győr-Moson-Sopron	47.675083 17.681138	8136 0+150	light injury	normal	sunny	track leaving, without solid object collision
1808	2012-06-19 11:00:00	Heves	47.801147 19.764882	24142 0+010	fatal	normal	sunny	slipping, carving, overturning on the road
1809	2012-06-19 14:50:00	Heves	47.883554 20.384277	94000	light injury	normal	sunny	collision in crossing direction
1810	2012-06-19 15:14:00	Győr-Moson-Sopron	47.715499 17.511166	1 137+430	light injury	normal	sunny	track leaving, without solid object collision
1811	2012-06-19 16:02:00	Győr-Moson-Sopron	47.67325 17.626888	94000	light injury	normal	sunny	collision with stopped vehicle
1812	2012-06-19 21:00:00	Heves	47.910582 20.376722	2504 0+475	serious injury	normal	sunny	collision in same direction
1813	2012-06-20 06:55:00	Győr-Moson-Sopron	47.682747 16.575962	86107 2+850	serious injury	normal	sunny	pedestrian
1814	2012-06-20 07:00:00	Heves	47.62809 20.235659	3204 30+000	light injury	normal	sunny	collision in same direction
1815	2012-06-20 13:05:00	Győr-Moson-Sopron	47.611694 17.250277	85 26+500	light injury	normal	sunny	pedestrian
1816	2012-06-20 18:40:00	Győr-Moson-Sopron	47.669166 17.653583	94000	serious injury	normal	overcast	collision in same direction
1817	2012-06-21 10:15:00	Heves	47.845811 20.22841	2416 27+490	light injury	normal	sunny	collision in crossing direction
1818	2012-06-22 06:25:00	Győr-Moson-Sopron	47.690222 17.661499	94000	serious injury	wet	overcast	collision in crossing direction
1819	2012-06-22 13:10:00	Győr-Moson-Sopron	47.679611 17.638333	94000	light injury	normal	sunny	pedestrian
1820	2012-06-23 07:00:00	Győr-Moson-Sopron	47.671361 17.608971	94000	light injury	normal	overcast	track leaving, without solid object collision
1821	2012-06-23 09:10:00	Győr-Moson-Sopron	47.680939 16.570125	94000	light injury	normal	overcast	collision in crossing direction
1822	2012-06-23 13:00:00	Heves	47.835087 19.963125	24 8+100	serious injury	normal	sunny	track leaving, without solid object collision
1823	2012-06-23 17:55:00	Heves	48.03047 20.478833	2505 15+067	light injury	normal	sunny	track leaving, without solid object collision
1824	2012-06-24 04:30:00	Heves	47.799282 20.354098	25 1+444	light injury	normal	sunny	track leaving, with solid object collision
1825	2012-06-25 10:50:00	Győr-Moson-Sopron	47.891244 17.331529	94000	light injury	wet	rainy	collision in crossing direction
1826	2012-06-25 14:40:00	Győr-Moson-Sopron	47.600166 16.753416	85 63+775	light injury	wet	overcast	track leaving, without solid object collision
1827	2012-06-25 14:45:00	Győr-Moson-Sopron	47.68575 17.640666	1 125+635	light injury	wet	rainy	collision with turning
1828	2012-06-25 14:50:00	Győr-Moson-Sopron	47.621328 16.787546	8518-10-31 20:00:00	light injury	wet	rainy	collision in same direction
1829	2012-06-25 15:30:00	Heves	47.929112 20.119997	94000	serious injury	normal	sunny	collision with solid obstacle
1830	2012-06-25 15:38:00	Győr-Moson-Sopron	47.446973 17.81511	82 45+512	fatal	normal	sunny	collision in crossing direction
1831	2012-06-25 16:00:00	Győr-Moson-Sopron	47.685501 16.563862	86107 4+668	light injury	wet	overcast	collision in crossing direction
1832	2012-06-26 16:48:00	Győr-Moson-Sopron	47.681834 16.5975	94000	serious injury	normal	sunny	collision in crossing direction
1833	2012-06-26 16:50:00	Heves	47.76506 20.511852	M3 116+100	light injury	normal	sunny	track leaving, without solid object collision
1834	2012-06-26 20:40:00	Győr-Moson-Sopron	47.820777 17.498027	1401 17+000	light injury	normal	sunny	track leaving, without solid object collision
1835	2012-06-26 21:35:00	Heves	47.787933 19.977665	2416-01-31 21:47:00	light injury	normal	sunny	track leaving, with solid object collision
1836	2012-06-27 09:44:00	Győr-Moson-Sopron	47.663778 17.635499	94000	light injury	normal	sunny	pedestrian
1837	2012-06-27 16:50:00	Heves	47.908443 20.371583	94000	light injury	normal	sunny	collision in crossing direction
1838	2012-06-27 17:05:00	Győr-Moson-Sopron	47.626098 17.318175	8511-07-01 02:00:00	serious injury	normal	sunny	track leaving, without solid object collision
1839	2012-06-28 07:05:00	Győr-Moson-Sopron	47.712696 16.572612	84 124+750	light injury	normal	sunny	collosing opposite direction
1840	2012-06-28 08:28:00	Győr-Moson-Sopron	47.684083 17.629722	94000	serious injury	normal	sunny	collision in same direction
1841	2012-06-28 10:40:00	Heves	47.707861 19.666861	21 4+130	light injury	normal	overcast	collision with solid obstacle
1842	2012-06-28 16:55:00	Győr-Moson-Sopron	47.618389 17.582083	8418-01-31 17:10:00	light injury	normal	sunny	track leaving, with solid object collision
1843	2012-06-28 17:00:00	Győr-Moson-Sopron	47.666944 17.649388	94000	serious injury	normal	sunny	collision in crossing direction
1844	2012-06-28 18:16:00	Győr-Moson-Sopron	47.887616 17.32166	94000	light injury	normal	sunny	collision with turning
1845	2012-06-29 11:30:00	Győr-Moson-Sopron	47.717527 17.655194	94000	light injury	normal	sunny	collision in crossing direction
1846	2012-06-29 15:30:00	Heves	47.784172 19.927503	94000	light injury	normal	sunny	collision with turning
1847	2012-06-29 16:05:00	Győr-Moson-Sopron	47.599972 16.864361	8521 1+778	serious injury	normal	overcast	collision in crossing direction
1848	2012-06-29 18:10:00	Győr-Moson-Sopron	47.589277 16.999499	85 45+450	light injury	normal	sunny	collosing opposite direction
1849	2012-06-30 09:00:00	Heves	47.895943 20.18425	2415-04-30 18:10:00	light injury	normal	sunny	collosing opposite direction
1850	2012-06-30 10:03:00	Győr-Moson-Sopron	47.703861 17.63361	14 1+912	serious injury	normal	sunny	collision in crossing direction
1851	2012-06-30 13:00:00	Heves	47.815483 19.787891	2406 9+898	light injury	normal	sunny	pedestrian
1852	2012-06-30 20:10:00	Heves	47.895991 20.388628	94000	light injury	normal	sunny	collision with animals
1853	2012-07-01 04:55:00	Heves	47.80486 20.35725	25 2+000	light injury	normal	sunny	track leaving, without solid object collision
1854	2012-07-01 05:35:00	Győr-Moson-Sopron	47.949414 17.347161	94000	light injury	normal	sunny	track leaving, with solid object collision
1855	2012-07-01 10:10:00	Heves	47.870049 19.982025	24134 0+450	light injury	normal	sunny	collosing opposite direction
1856	2012-07-01 15:29:00	Győr-Moson-Sopron	47.734805 17.640277	14 6+180	serious injury	normal	sunny	collision with turning
1857	2012-07-01 16:00:00	Heves	48.00722 20.130722	2412-10-31 23:54:00	light injury	wet	sunny	track leaving, with solid object collision
1858	2012-07-01 19:00:00	Heves	48.057109 20.175166	94000	serious injury	not a road	sunny	track leaving, without solid object collision
1859	2012-07-02 04:30:00	Győr-Moson-Sopron	47.738207 17.434598	M1 140+100	light injury	normal	sunny	track leaving, with solid object collision
1860	2012-07-02 07:05:00	Heves	47.560655 20.520164	94000	serious injury	normal	sunny	collision in crossing direction
1861	2012-07-02 07:35:00	Heves	47.901665 20.383027	94000	light injury	normal	sunny	collosing opposite direction
1862	2012-07-02 09:30:00	Győr-Moson-Sopron	47.638055 17.606916	94000	light injury	normal	sunny	pedestrian
1863	2012-07-02 16:35:00	Győr-Moson-Sopron	47.746805 17.571027	94000	light injury	normal	sunny	collision with turning
1864	2012-07-02 19:45:00	Győr-Moson-Sopron	47.675279 16.599	86107 1+490	serious injury	normal	sunny	collision in crossing direction
1865	2012-07-02 20:03:00	Győr-Moson-Sopron	47.655666 17.529221	94000	light injury	normal	sunny	collision with turning
1866	2012-07-02 20:05:00	Győr-Moson-Sopron	47.661611 17.635999	94000	light injury	normal	sunny	collision in same direction
1867	2012-07-03 08:45:00	Heves	47.895498 20.375305	94000	light injury	normal	overcast	collision in crossing direction
1868	2012-07-03 11:25:00	Heves	47.668032 19.669532	3 57+393	light injury	normal	sunny	collision in crossing direction
1869	2012-07-03 12:00:00	Győr-Moson-Sopron	47.693944 17.663249	94000	light injury	not a road	sunny	pedestrian
1870	2012-07-03 16:00:00	Győr-Moson-Sopron	47.688584 16.562389	94000	light injury	normal	sunny	collision in crossing direction
1871	2012-07-03 21:00:00	Győr-Moson-Sopron	47.453778 17.30911	94000	serious injury	normal	overcast	track leaving, with solid object collision
1872	2012-07-03 22:40:00	Heves	47.918137 20.309916	24 55+429	light injury	normal	sunny	track leaving, with solid object collision
1873	2012-07-04 11:00:00	Heves	47.857887 20.438861	2503-04-30 19:32:00	light injury	normal	sunny	collision in crossing direction
1874	2012-07-04 14:05:00	Győr-Moson-Sopron	47.727723 16.642973	8527 13+500	serious injury	normal	sunny	track leaving, without solid object collision
1875	2012-07-04 14:50:00	Heves	47.845009 19.958439	24 10+310	serious injury	normal	sunny	collision in same direction
1876	2012-07-04 16:50:00	Heves	47.871221 20.388361	2500 0+437	light injury	normal	sunny	collision in same direction
1877	2012-07-04 17:05:00	Heves	47.708626 20.183326	M3 95+750	serious injury	normal	sunny	collision in same direction
1878	2012-07-04 18:30:00	Győr-Moson-Sopron	47.691472 17.564805	94000	serious injury	not a road	sunny	slipping, carving, overturning on the road
1879	2012-07-04 19:30:00	Heves	47.795757 19.93013	24136 1+183	serious injury	normal	sunny	collision in crossing direction
1880	2012-07-04 22:00:00	Győr-Moson-Sopron	47.645444 17.61761	83 70+050	light injury	normal	sunny	collision with animals
1881	2012-07-05 08:35:00	Győr-Moson-Sopron	47.7276 16.642832	8527-01-31 20:00:00	light injury	normal	sunny	collision in same direction
1882	2012-07-05 09:00:00	Győr-Moson-Sopron	47.670556 16.579862	94000	serious injury	normal	sunny	slipping, carving, overturning on the road
1883	2012-07-05 15:15:00	Heves	47.907059 20.36622	25 15+364	serious injury	normal	sunny	collision in same direction
1884	2012-07-05 17:27:00	Győr-Moson-Sopron	47.662278 17.756833	10487 0+274	light injury	normal	sunny	track leaving, without solid object collision
1885	2012-07-06 07:30:00	Heves	47.687801 19.696142	M3 57+000	light injury	normal	sunny	track leaving, without solid object collision
1886	2012-07-06 10:15:00	Heves	47.782154 20.364737	3 120+700	serious injury	normal	sunny	track leaving, without solid object collision
1887	2012-07-06 11:39:00	Heves	47.666926 19.66795	3 57+157	light injury	normal	sunny	collision in crossing direction
1888	2012-07-06 16:00:00	Heves	47.55725 20.356084	32309 0+028	light injury	normal	sunny	track leaving, without solid object collision
1889	2012-07-06 19:05:00	Győr-Moson-Sopron	47.591481 16.886023	94000	serious injury	wet	rainy	collision in crossing direction
1890	2012-07-06 22:45:00	Heves	47.639745 20.643032	33 25+728	serious injury	wet	overcast	pedestrian
1891	2012-07-07 02:35:00	Heves	47.75332 20.415801	33110 1+529	light injury	normal	sunny	collision with solid obstacle
1892	2012-07-07 08:00:00	Heves	47.66616 19.701888	3 59+869	serious injury	normal	sunny	collision in same direction
1893	2012-07-07 09:50:00	Győr-Moson-Sopron	47.430204 17.479853	83 42+050	serious injury	normal	sunny	collosing opposite direction
1894	2012-07-07 10:00:00	Győr-Moson-Sopron	47.676222 17.61211	94000	light injury	normal	sunny	track leaving, without solid object collision
1895	2012-07-07 10:45:00	Győr-Moson-Sopron	47.658731 17.654923	94000	serious injury	normal	sunny	collision in same direction
1896	2012-07-07 11:35:00	Heves	47.726561 20.416183	33 4+800	serious injury	normal	sunny	track leaving, without solid object collision
1897	2012-07-07 15:50:00	Győr-Moson-Sopron	47.698666 17.647027	94000	serious injury	normal	sunny	slipping, carving, overturning on the road
1898	2012-07-07 16:35:00	Heves	47.899114 20.374679	94000	light injury	normal	sunny	collosing opposite direction
1899	2012-07-07 19:35:00	Győr-Moson-Sopron	47.686384 17.807388	M1 106+570	light injury	normal	sunny	track leaving, with solid object collision
1900	2012-07-07 19:45:00	Győr-Moson-Sopron	47.87686 17.26875	150 0+650	light injury	normal	sunny	pedestrian
1901	2012-07-07 23:45:00	Heves	47.771397 20.541752	M3 124+420	light injury	normal	sunny	collision in same direction
1902	2012-07-08 04:00:00	Heves	47.673586 19.639707	M3 52+350	light injury	normal	sunny	collision in same direction
1903	2012-07-08 05:15:00	Győr-Moson-Sopron	47.640416 17.077638	94000	light injury	normal	sunny	track leaving, with solid object collision
1904	2012-07-08 08:55:00	Heves	47.807969 19.953477	24 4+325	light injury	normal	sunny	collosing opposite direction
1905	2012-07-08 13:42:00	Győr-Moson-Sopron	47.690583 17.626333	94000	serious injury	normal	sunny	collision in crossing direction
1906	2012-07-09 11:58:00	Győr-Moson-Sopron	47.691166 17.692027	94000	light injury	normal	sunny	track leaving, without solid object collision
1907	2012-07-09 14:07:00	Heves	47.857448 20.367371	25 8+739	fatal	wet	overcast	collosing opposite direction
1908	2012-07-10 10:55:00	Győr-Moson-Sopron	47.680528 17.657444	94000	light injury	normal	sunny	collision in same direction
1909	2012-07-10 12:45:00	Győr-Moson-Sopron	47.684362 16.573584	94000	light injury	normal	sunny	collision in same direction
1910	2012-07-10 21:05:00	Győr-Moson-Sopron	47.585541 16.770615	85 63+901	serious injury	wet	overcast	track leaving, without solid object collision
1911	2012-07-11 09:01:00	Győr-Moson-Sopron	47.678145 16.54183	86107 6+800	serious injury	normal	sunny	pedestrian
1912	2012-07-11 09:51:00	Győr-Moson-Sopron	47.683277 17.627722	94000	light injury	not a road	sunny	collision in same direction
1913	2012-07-11 12:25:00	Győr-Moson-Sopron	47.871256 17.2772	94000	serious injury	normal	sunny	collision in crossing direction
1914	2012-07-11 13:08:00	Győr-Moson-Sopron	47.691584 16.605389	94000	light injury	normal	overcast	collision in crossing direction
1915	2012-07-11 13:30:00	Győr-Moson-Sopron	47.735666 17.391222	94000	serious injury	normal	sunny	collision in crossing direction
1916	2012-07-11 17:30:00	Győr-Moson-Sopron	47.662361 17.486749	85 7+120	serious injury	normal	overcast	track leaving, without solid object collision
1917	2012-07-12 04:45:00	Heves	47.985079 20.172923	24123 2+700	light injury	wet	overcast	track leaving, with solid object collision
1918	2012-07-12 19:20:00	Heves	47.737922 19.682662	2401-09-01 02:00:00	light injury	normal	sunny	track leaving, without solid object collision
1919	2012-07-13 08:58:00	Győr-Moson-Sopron	47.661889 17.651249	94000	light injury	normal	sunny	collision in crossing direction
1920	2012-07-13 13:38:00	Győr-Moson-Sopron	47.879388 17.264805	94000	light injury	wet	rainy	collision in crossing direction
1921	2012-07-13 15:45:00	Heves	47.704305 20.069791	M3 86+400	serious injury	normal	sunny	track leaving, without solid object collision
1922	2012-07-13 17:20:00	Győr-Moson-Sopron	47.600527 17.291694	8422-01-31 23:40:00	light injury	wet	rainy	collision in same direction
1923	2012-07-13 17:55:00	Győr-Moson-Sopron	47.594305 17.243666	86 0+148	light injury	wet	rainy	collision in same direction
1924	2012-07-14 14:30:00	Győr-Moson-Sopron	47.663972 17.749472	8136 46+047	serious injury	normal	sunny	collision in crossing direction
1925	2012-07-14 21:35:00	Győr-Moson-Sopron	47.692583 17.630944	94000	light injury	wet	rainy	collision with solid obstacle
1926	2012-07-15 00:25:00	Győr-Moson-Sopron	47.563207 17.713315	94000	serious injury	wet	rainy	pedestrian
1927	2012-07-15 11:05:00	Heves	47.648806 20.666472	33 27+797	light injury	normal	overcast	collision in crossing direction
1928	2012-07-15 19:20:00	Heves	47.66647 19.691627	3 59+100	light injury	wet	sunny	collision with turning
1929	2012-07-15 22:05:00	Heves	47.788944 19.736611	94000	light injury	normal	overcast	track leaving, without solid object collision
1930	2012-07-16 10:45:00	Győr-Moson-Sopron	47.869379 17.25395	94000	light injury	normal	sunny	collision in same direction
1931	2012-07-16 12:25:00	Győr-Moson-Sopron	47.647139 17.707888	M1 115+650	serious injury	wet	overcast	track leaving, with solid object collision
1932	2012-07-17 01:40:00	Győr-Moson-Sopron	47.689196 16.519751	94000	serious injury	normal	sunny	slipping, carving, overturning on the road
1933	2012-07-17 10:50:00	Heves	47.789649 19.914114	2406 19+995	light injury	normal	sunny	collision with turning
1934	2012-07-17 15:40:00	Győr-Moson-Sopron	47.63925 17.381971	M85 11+146	light injury	normal	sunny	track leaving, without solid object collision
1935	2012-07-17 16:00:00	Győr-Moson-Sopron	47.679444 17.659333	81 811+742	light injury	normal	sunny	collision in crossing direction
1936	2012-07-17 16:40:00	Heves	47.704305 20.069791	M3 82+450	light injury	normal	sunny	track leaving, without solid object collision
1937	2012-07-18 10:45:00	Győr-Moson-Sopron	47.740027 17.578333	94000	light injury	normal	sunny	collosing opposite direction
1938	2012-07-18 14:50:00	Heves	47.731689 20.034641	94000	light injury	normal	sunny	collision in crossing direction
1939	2012-07-18 17:35:00	Győr-Moson-Sopron	47.589694 17.005027	85 45+350	light injury	normal	sunny	collision in same direction
1940	2012-07-18 22:55:00	Heves	47.495611 20.364167	32111 14+409	serious injury	normal	sunny	collosing opposite direction
1941	2012-07-19	Győr-Moson-Sopron	47.667895 17.640822	94000	serious injury	normal	sunny	collision in same direction
1942	2012-07-19 08:05:00	Győr-Moson-Sopron	47.678416 17.660888	94000	serious injury	normal	sunny	collision in crossing direction
1943	2012-07-19 11:25:00	Heves	47.914408 20.370031	25 16+900	light injury	normal	sunny	collision with turning
1944	2012-07-19 11:35:00	Heves	47.632188 20.32685	31 116+845	serious injury	normal	sunny	collision in same direction
1945	2012-07-19 12:40:00	Heves	47.934333 20.354907	94000	serious injury	normal	sunny	slipping, carving, overturning on the road
1946	2012-07-19 13:20:00	Győr-Moson-Sopron	47.658416 17.655249	82 71+1732	serious injury	normal	sunny	pedestrian
1947	2012-07-19 14:20:00	Győr-Moson-Sopron	47.679694 17.64536	94000	serious injury	normal	sunny	other
1948	2012-07-19 14:30:00	Heves	47.774885 19.940895	3 82+305	serious injury	normal	sunny	collision with turning
1949	2012-07-19 15:15:00	Győr-Moson-Sopron	47.684416 17.635249	94000	light injury	normal	sunny	collision in same direction
1950	2012-07-19 19:05:00	Győr-Moson-Sopron	47.830444 17.473555	1401 19+400	serious injury	wet	stormy	track leaving, without solid object collision
1951	2012-07-20 11:05:00	Győr-Moson-Sopron	47.856721 17.275278	94000	serious injury	normal	sunny	pedestrian
1952	2012-07-20 11:36:00	Győr-Moson-Sopron	47.558555 17.48186	8418 7+760	light injury	normal	sunny	track leaving, without solid object collision
1953	2012-07-20 22:25:00	Győr-Moson-Sopron	47.992666 17.186223	M15 12+098	fatal	wet	rainy	collosing opposite direction
1954	2012-07-21 05:30:00	Győr-Moson-Sopron	47.844332 17.258722	M1 153+138	light injury	wet	rainy	track leaving, with solid object collision
1955	2012-07-21 16:52:00	Győr-Moson-Sopron	47.607398 17.639419	82 691+143	light injury	wet	rainy	track leaving, without solid object collision
1956	2012-07-23 07:20:00	Győr-Moson-Sopron	47.674333 17.637583	94000	light injury	normal	sunny	collision with turning
1957	2012-07-24 11:40:00	Győr-Moson-Sopron	47.861027 17.327583	94000	light injury	normal	sunny	collision with turning
1958	2012-07-24 14:25:00	Heves	47.902915 20.370166	94000	light injury	normal	sunny	track leaving, without solid object collision
1959	2012-07-24 14:30:00	Heves	47.900221 20.383916	94000	serious injury	normal	sunny	collision with stopped vehicle
1960	2012-07-24 17:58:00	Győr-Moson-Sopron	47.668333 17.655999	94000	light injury	not a road	sunny	collision in crossing direction
1961	2012-07-25 02:57:00	Győr-Moson-Sopron	47.655666 17.633333	83 71+800	light injury	wet	stormy	collision in same direction
1962	2012-07-25 08:25:00	Győr-Moson-Sopron	47.666805 17.659499	94000	light injury	normal	overcast	collision with turning
1963	2012-07-25 08:46:00	Győr-Moson-Sopron	47.726194 17.663694	94000	light injury	normal	sunny	collision in crossing direction
1964	2012-07-25 10:05:00	Győr-Moson-Sopron	47.585541 16.770615	85 65+270	fatal	wet	rainy	collosing opposite direction
1965	2012-07-25 18:40:00	Győr-Moson-Sopron	47.69214 16.581778	94000	light injury	normal	overcast	collision in same direction
1966	2012-07-25 21:15:00	Heves	47.811538 20.081325	94000	serious injury	normal	overcast	track leaving, without solid object collision
1967	2012-07-26 10:47:00	Győr-Moson-Sopron	47.683111 17.643972	94000	light injury	normal	sunny	collision in crossing direction
1968	2012-07-26 12:20:00	Heves	47.787743 19.9769	2416-01-31 22:10:00	serious injury	normal	sunny	collision with turning
1969	2012-07-26 13:00:00	Győr-Moson-Sopron	47.678861 17.689222	94000	light injury	normal	sunny	collision in crossing direction
1970	2012-07-26 17:40:00	Győr-Moson-Sopron	47.634361 16.713361	8518 18+000	light injury	normal	overcast	collision in crossing direction
1971	2012-07-27 10:20:00	Győr-Moson-Sopron	47.603638 17.203277	85 29+850	light injury	normal	sunny	track leaving, without solid object collision
1972	2012-07-27 10:45:00	Heves	47.666583 19.685889	94000	fatal	normal	sunny	pedestrian
1973	2012-07-27 10:50:00	Heves	47.899267 20.375129	94000	light injury	normal	sunny	collision in crossing direction
1974	2012-07-27 14:30:00	Győr-Moson-Sopron	47.613547 16.691909	84602 0+046	light injury	normal	sunny	track leaving, without solid object collision
1975	2012-07-27 15:55:00	Heves	47.99063 20.327173	25 26+770	serious injury	wet	rainy	collosing opposite direction
1976	2012-07-28 06:00:00	Heves	47.706166 20.147805	M3 93+100	serious injury	normal	sunny	collision in same direction
1977	2012-07-28 07:50:00	Győr-Moson-Sopron	47.68966 16.577353	94000	light injury	normal	sunny	collision in crossing direction
1978	2012-07-28 07:55:00	Győr-Moson-Sopron	47.499805 16.771833	94000	light injury	normal	sunny	collision with turning
1979	2012-07-28 10:10:00	Heves	48.018748 20.469388	2505 13+204	serious injury	wet	sunny	track leaving, without solid object collision
1980	2012-07-28 11:00:00	Heves	47.810984 19.93783	94000	light injury	normal	sunny	collision in crossing direction
1981	2012-07-29 05:45:00	Győr-Moson-Sopron	47.68625 17.632083	94000	light injury	normal	sunny	slipping, carving, overturning on the road
1982	2012-07-29 05:46:00	Győr-Moson-Sopron	47.590028 17.689555	94000	light injury	normal	overcast	track leaving, with solid object collision
1983	2012-07-29 14:55:00	Heves	47.5935 20.289139	31 0+124	serious injury	normal	sunny	track leaving, without solid object collision
1984	2012-07-29 19:45:00	Heves	47.721163 20.477379	33101 9+140	light injury	normal	overcast	track leaving, without solid object collision
1985	2012-07-29 20:15:00	Heves	47.665504 19.667631	94000	light injury	normal	overcast	collision with turning
1986	2012-07-30 08:39:00	Győr-Moson-Sopron	47.653696 16.48889	86107 12+969	serious injury	normal	sunny	track leaving, without solid object collision
1987	2012-07-30 12:00:00	Győr-Moson-Sopron	47.684 17.632388	94000	light injury	normal	sunny	collision with stopped vehicle
1988	2012-07-31 01:36:00	Győr-Moson-Sopron	47.673028 17.654555	94000	light injury	normal	sunny	collision with stopped vehicle
1989	2012-07-31 17:05:00	Győr-Moson-Sopron	47.663722 17.656388	94000	light injury	normal	sunny	collision in crossing direction
1990	2012-07-31 17:35:00	Győr-Moson-Sopron	47.676973 16.583889	94000	light injury	normal	sunny	collision with turning
1991	2012-07-31 18:50:00	Heves	47.920889 20.369369	25 17+200	light injury	normal	sunny	pedestrian
1992	2012-07-31 18:50:00	Heves	47.790471 19.912774	2406 19+860	serious injury	normal	sunny	track leaving, without solid object collision
1993	2012-08-01 07:40:00	Heves	47.895443 20.386611	94000	serious injury	normal	sunny	pedestrian
1994	2012-08-01 10:20:00	Győr-Moson-Sopron	47.469555 17.294194	8408 18+000	light injury	normal	sunny	track leaving, with solid object collision
1995	2012-08-01 14:00:00	Győr-Moson-Sopron	47.671916 17.641888	94000	light injury	normal	sunny	collision in crossing direction
1996	2012-08-01 17:20:00	Heves	47.654596 20.340577	31 119+550	serious injury	normal	sunny	track leaving, without solid object collision
1997	2012-08-02 10:45:00	Győr-Moson-Sopron	47.879365 17.274896	94000	serious injury	normal	sunny	collision in crossing direction
1998	2012-08-02 12:10:00	Győr-Moson-Sopron	47.567361 16.860277	8627-02-28 21:33:00	light injury	normal	sunny	track leaving, without solid object collision
1999	2012-08-02 13:00:00	Győr-Moson-Sopron	47.575322 17.580044	83 61+000	light injury	normal	sunny	collision in same direction
[truncated: 8,099 more rows]
